# Supplementary material for: DiabeticSense: A Non-Invasive Multi-Sensor IoT-based System for Diabetes Detection Using Breath
Source: Preprints.org preprint supplement (doi:10.20944/preprints202308.1754.v1), 2023-08-25
Supplement: Supplementary file 1 [file supplementary]

Sample_No	Timestamps	Temperature	Humidity	TGS2620	TGS2610	TGS2602	TGS2603	TGS822	TGS2600	TGS826	MQ138	Age	Gender	max_BP	min_BP	Heart_Beat	SPO2	Diabetes	BGL	Other Remarks
1	2023-05-27T07:36:39.910483836Z	29.5	37.9	1.23	0.62	0.82	1.04	0.73	1.02	0.11	2.17	26	0	120	80	93	98	0	92
1	2023-05-27T07:36:42.997131214Z	29.5	38	1.23	0.62	0.82	1.04	0.72	1.02	0.11	2.16	26	0	120	80	93	98	0	92
1	2023-05-27T07:36:45.636865754Z	29.5	38.1	1.23	0.63	0.83	1.04	0.72	1.02	0.11	2.16	26	0	120	80	93	98	0	92
1	2023-05-27T07:36:48.722909666Z	29.5	38.1	1.23	0.63	0.83	1.04	0.71	1.02	0.11	2.15	26	0	120	80	93	98	0	92
1	2023-05-27T07:36:51.791569449Z	29.5	38	1.23	0.64	0.83	1.04	0.71	1.03	0.11	2.14	26	0	120	80	93	98	0	92
1	2023-05-27T07:36:55.697095287Z	29.6	38	1.23	0.64	0.84	1.04	0.7	1.02	0.11	2.13	26	0	120	80	93	98	0	92
1	2023-05-27T07:36:58.741903063Z	29.6	38.1	1.23	0.65	0.84	1.04	0.7	1.02	0.11	2.14	26	0	120	80	93	98	0	92
1	2023-05-27T07:37:02.253312633Z	29.6	38.2	1.23	0.65	0.85	1.04	0.7	1.03	0.11	2.14	26	0	120	80	93	98	0	92
1	2023-05-27T07:37:05.113665168Z	29.6	38.2	1.23	0.66	0.85	1.04	0.69	1.03	0.11	2.14	26	0	120	80	93	98	0	92
1	2023-05-27T07:37:08.28189169Z	29.6	38.1	1.23	0.66	0.85	1.03	0.69	1.02	0.11	2.13	26	0	120	80	93	98	0	92
1	2023-05-27T07:37:11.879560152Z	29.7	37.7	1.23	0.67	0.86	1.03	0.69	1.02	0.11	2.12	26	0	120	80	93	98	0	92
1	2023-05-27T07:37:15.337918225Z	29.7	37.6	1.22	0.67	0.86	1.02	0.69	1.02	0.11	2.13	26	0	120	80	93	98	0	92
1	2023-05-27T07:37:18.828369828Z	29.7	37.5	1.22	0.67	0.86	1.02	0.68	1.01	0.11	2.12	26	0	120	80	93	98	0	92
1	2023-05-27T07:37:22.107174905Z	29.7	37.4	1.22	0.68	0.86	1.02	0.68	1.01	0.11	2.12	26	0	120	80	93	98	0	92
1	2023-05-27T07:37:25.584661004Z	29.8	37.4	1.22	0.68	0.86	1.02	0.68	1.01	0.11	2.12	26	0	120	80	93	98	0	92
1	2023-05-27T07:37:29.315250285Z	29.8	37.4	1.22	0.69	0.86	1.02	0.68	1.01	0.11	2.12	26	0	120	80	93	98	0	92
1	2023-05-27T07:37:31.921360336Z	29.8	37.4	1.22	0.69	0.87	1.02	0.68	1.01	0.11	2.13	26	0	120	80	93	98	0	92
1	2023-05-27T07:37:34.426050047Z	29.8	37.3	1.22	0.69	0.87	1.01	0.68	1.01	0.11	2.13	26	0	120	80	93	98	0	92
1	2023-05-27T07:37:37.475657715Z	29.8	37.3	1.22	0.69	0.87	1.02	0.68	1.01	0.11	2.12	26	0	120	80	93	98	0	92
1	2023-05-27T07:37:40.519601612Z	29.9	37.4	1.22	0.7	0.87	1.02	0.68	1.01	0.11	2.12	26	0	120	80	93	98	0	92
1	2023-05-27T07:37:43.609990019Z	29.9	37.6	1.22	0.7	0.87	1.02	0.68	1.01	0.11	2.13	26	0	120	80	93	98	0	92
1	2023-05-27T07:37:46.925372939Z	29.9	37.4	1.22	0.7	0.87	1.02	0.68	1	0.11	2.14	26	0	120	80	93	98	0	92
1	2023-05-27T07:37:49.544411876Z	29.9	37.2	1.22	0.7	0.87	1.02	0.67	1	0.11	2.12	26	0	120	80	93	98	0	92
1	2023-05-27T07:37:52.403034745Z	29.9	37.3	1.22	0.7	0.88	1.02	0.68	1	0.11	2.12	26	0	120	80	93	98	0	92
1	2023-05-27T07:37:55.26999286Z	30	37.5	1.22	0.71	0.88	1.02	0.67	1	0.11	2.12	26	0	120	80	93	98	0	92
1	2023-05-27T07:37:58.143750774Z	30	37.2	1.22	0.71	0.88	1.03	0.67	1	0.11	2.13	26	0	120	80	93	98	0	92
1	2023-05-27T07:38:01.00797427Z	30	37.3	1.22	0.71	0.88	1.03	0.67	1	0.11	2.13	26	0	120	80	93	98	0	92
1	2023-05-27T07:38:04.286172458Z	30.1	37.5	1.21	0.71	0.88	1.03	0.67	1	0.11	2.13	26	0	120	80	93	98	0	92
1	2023-05-27T07:38:07.387317874Z	30.1	37.3	1.21	0.72	0.88	1.03	0.67	1	0.11	2.14	26	0	120	80	93	98	0	92
1	2023-05-27T07:38:10.240059778Z	30.1	37.3	1.2	0.72	0.88	1.03	0.67	1	0.11	2.13	26	0	120	80	93	98	0	92
1	2023-05-27T07:38:12.697755595Z	30.2	37.1	1.21	0.72	0.88	1.03	0.67	1	0.11	2.12	26	0	120	80	93	98	0	92
1	2023-05-27T07:38:16.36040759Z	30.2	37	1.21	0.72	0.88	1.03	0.67	1	0.11	2.12	26	0	120	80	93	98	0	92
1	2023-05-27T07:38:19.661429534Z	30.2	37	1.21	0.72	0.89	1.03	0.67	1	0.11	2.12	26	0	120	80	93	98	0	92
1	2023-05-27T07:38:22.706181945Z	30.2	37	1.2	0.72	0.89	1.03	0.67	1	0.11	2.12	26	0	120	80	93	98	0	92
1	2023-05-27T07:38:25.597280202Z	30.2	36.8	1.2	0.72	0.89	1.03	0.67	1	0.11	2.13	26	0	120	80	93	98	0	92
1	2023-05-27T07:38:28.668496049Z	30.3	36.9	1.2	0.73	0.89	1.03	0.67	0.99	0.11	2.13	26	0	120	80	93	98	0	92
1	2023-05-27T07:38:31.728976844Z	30.3	36.9	1.2	0.73	0.89	1.03	0.67	1	0.11	2.12	26	0	120	80	93	98	0	92
1	2023-05-27T07:38:35.003373788Z	30.3	36.9	1.2	0.73	0.89	1.03	0.67	1	0.11	2.13	26	0	120	80	93	98	0	92
1	2023-05-27T07:38:38.28883452Z	30.3	36.9	1.2	0.73	0.89	1.03	0.67	1	0.11	2.12	26	0	120	80	93	98	0	92
1	2023-05-27T07:38:40.968886633Z	30.3	36.8	1.2	0.73	0.89	1.03	0.67	1	0.11	2.12	26	0	120	80	93	98	0	92
1	2023-05-27T07:38:43.602044369Z	30.4	36.7	1.2	0.73	0.89	1.03	0.67	1	0.11	2.12	26	0	120	80	93	98	0	92
1	2023-05-27T07:38:46.465398218Z	30.4	36.5	1.2	0.73	0.89	1.03	0.67	1	0.11	2.13	26	0	120	80	93	98	0	92
1	2023-05-27T07:38:49.765441846Z	30.4	36.7	1.2	0.74	0.89	1.03	0.67	0.99	0.11	2.13	26	0	120	80	93	98	0	92
1	2023-05-27T07:38:53.036596347Z	30.4	36.8	1.2	0.74	0.89	1.03	0.67	0.99	0.11	2.12	26	0	120	80	93	98	0	92
1	2023-05-27T07:38:55.908916998Z	30.4	36.7	1.2	0.74	0.89	1.02	0.67	0.99	0.11	2.13	26	0	120	80	93	98	0	92
1	2023-05-27T07:38:58.966375Z	30.5	36.7	1.2	0.74	0.89	1.02	0.67	0.99	0.11	2.14	26	0	120	80	93	98	0	92
1	2023-05-27T07:39:02.451913148Z	30.5	36.8	1.2	0.74	0.9	1.03	0.67	0.99	0.11	2.14	26	0	120	80	93	98	0	92
1	2023-05-27T07:39:05.945170163Z	30.5	36.8	1.2	0.74	0.9	1.04	0.67	0.99	0.11	2.14	26	0	120	80	93	98	0	92
1	2023-05-27T07:39:08.792620887Z	30.6	36.9	1.2	0.74	0.9	1.05	0.67	0.99	0.11	2.14	26	0	120	80	93	98	0	92
1	2023-05-27T07:39:12.949815742Z	30.6	36.9	1.2	0.74	0.9	1.05	0.67	0.99	0.11	2.13	26	0	120	80	93	98	0	92
1	2023-05-27T07:39:16.198261309Z	30.6	37.1	1.21	0.74	0.9	1.05	0.67	0.99	0.11	2.13	26	0	120	80	93	98	0	92
1	2023-05-27T07:39:18.827738296Z	30.7	36.7	1.2	0.74	0.9	1.05	0.67	0.99	0.11	2.13	26	0	120	80	93	98	0	92
1	2023-05-27T07:39:22.321144851Z	30.7	36.5	1.2	0.74	0.89	1.05	0.64	0.99	0.11	1.9	26	0	120	80	93	98	0	92
1	2023-05-27T07:39:25.607473165Z	30.7	36.5	1.17	0.74	0.76	1.07	0.59	0.97	0.11	1.4	26	0	120	80	93	98	0	92
1	2023-05-27T07:39:28.461380671Z	30.5	36.2	1.21	0.73	0.79	1.11	0.59	0.99	0.11	1.72	26	0	120	80	93	98	0	92
1	2023-05-27T07:39:31.546948607Z	30.4	36.2	1.22	0.72	0.84	1.11	0.64	1.01	0.11	2.08	26	0	120	80	93	98	0	92
1	2023-05-27T07:39:34.204302079Z	30.4	36.2	1.22	0.71	0.86	1.09	0.67	1.01	0.11	2.2	26	0	120	80	93	98	0	92
1	2023-05-27T07:39:37.675948381Z	30.4	36.3	1.22	0.71	0.86	1.07	0.68	1.01	0.11	2.23	26	0	120	80	93	98	0	92
1	2023-05-27T07:39:40.545523053Z	30.4	36.6	1.22	0.7	0.86	1.06	0.7	1.01	0.11	2.22	26	0	120	80	93	98	0	92
1	2023-05-27T07:39:44.022062696Z	30.4	36.7	1.22	0.7	0.86	1.05	0.7	1.01	0.11	2.2	26	0	120	80	93	98	0	92
1	2023-05-27T07:39:46.903441954Z	30.5	36.6	1.22	0.7	0.81	1.06	0.69	1.01	0.11	2.07	26	0	120	80	93	98	0	92
1	2023-05-27T07:39:49.971729247Z	30.4	36.4	1.21	0.7	0.78	1.08	0.68	1.01	0.11	2.05	26	0	120	80	93	98	0	92
1	2023-05-27T07:39:52.827032057Z	30.4	36.4	1.21	0.69	0.83	1.08	0.69	1	0.11	2.15	26	0	120	80	93	98	0	92
1	2023-05-27T07:39:55.905851657Z	30.4	36.3	1.2	0.69	0.84	1.07	0.69	1	0.11	2.17	26	0	120	80	93	98	0	92
1	2023-05-27T07:39:58.785206382Z	30.4	36.5	1.21	0.69	0.84	1.05	0.7	1	0.11	2.17	26	0	120	80	93	98	0	92
1	2023-05-27T07:40:02.043747118Z	30.4	36.5	1.21	0.68	0.84	1.04	0.7	1	0.11	2.17	26	0	120	80	93	98	0	92
1	2023-05-27T07:40:05.114283078Z	30.4	36.6	1.21	0.69	0.84	1.03	0.69	1	0.11	2.17	26	0	120	80	93	98	0	92
1	2023-05-27T07:40:07.816836468Z	30.4	36.9	1.21	0.69	0.84	1.03	0.69	1	0.11	2.17	26	0	120	80	93	98	0	92
1	2023-05-27T07:40:10.744413365Z	30.4	37.2	1.21	0.69	0.84	1.02	0.69	1	0.11	2.17	26	0	120	80	93	98	0	92
1	2023-05-27T07:40:14.120790256Z	30.4	37.5	1.21	0.69	0.84	1.02	0.69	1	0.11	2.17	26	0	120	80	93	98	0	92
1	2023-05-27T07:40:17.447465078Z	30.5	37.9	1.21	0.69	0.84	1.03	0.69	1	0.11	2.17	26	0	120	80	93	98	0	92
1	2023-05-27T07:40:21.318827104Z	30.5	38.2	1.26	0.69	1.09	1.24	0.73	1.01	0.11	2.19	26	0	120	80	93	98	0	92
1	2023-05-27T07:40:24.363033819Z	30.5	38.8	1.31	0.7	1.41	1.62	0.77	1.05	0.11	2.22	26	0	120	80	93	98	0	92
1	2023-05-27T07:40:27.437401314Z	30.6	39.4	1.37	0.7	1.77	1.86	0.82	1.09	0.11	2.25	26	0	120	80	93	98	0	92
1	2023-05-27T07:40:30.728410292Z	30.6	39.7	1.43	0.7	2.14	2.1	0.88	1.13	0.11	2.28	26	0	120	80	93	98	0	92
1	2023-05-27T07:40:33.619725603Z	30.6	39.9	1.48	0.7	2.4	2.3	0.93	1.17	0.11	2.31	26	0	120	80	93	98	0	92
1	2023-05-27T07:40:36.236172007Z	30.6	39.9	1.51	0.7	2.51	2.4	0.95	1.2	0.11	2.32	26	0	120	80	93	98	0	92
1	2023-05-27T07:40:38.920008132Z	30.7	40.1	1.54	0.72	2.58	2.48	0.98	1.23	0.13	2.33	26	0	120	80	93	98	0	92
1	2023-05-27T07:40:42.829629838Z	30.7	40.3	1.55	0.71	2.61	2.54	0.99	1.24	0.13	2.34	26	0	120	80	93	98	0	92
1	2023-05-27T07:40:45.936221011Z	30.7	40.5	1.57	0.72	2.62	2.59	1.01	1.26	0.13	2.35	26	0	120	80	93	98	0	92
1	2023-05-27T07:40:48.749286947Z	30.7	40.9	1.58	0.72	2.63	2.63	1.02	1.27	0.13	2.36	26	0	120	80	93	98	0	92
1	2023-05-27T07:40:51.607619251Z	30.8	41.3	1.59	0.72	2.63	2.65	1.04	1.28	0.13	2.36	26	0	120	80	93	98	0	92
1	2023-05-27T07:40:54.885394795Z	30.9	41.7	1.59	0.72	2.63	2.66	1.05	1.29	0.13	2.36	26	0	120	80	93	98	0	92
1	2023-05-27T07:40:58.383302182Z	30.9	42	1.6	0.72	2.62	2.68	1.06	1.3	0.13	2.37	26	0	120	80	93	98	0	92
1	2023-05-27T07:41:01.662107447Z	30.9	42.2	1.6	0.73	2.62	2.69	1.07	1.3	0.13	2.38	26	0	120	80	93	98	0	92
1	2023-05-27T07:41:04.502828807Z	31	42.6	1.61	0.73	2.61	2.69	1.08	1.31	0.13	2.38	26	0	120	80	93	98	0	92
1	2023-05-27T07:41:08.014387924Z	31	42.9	1.61	0.73	2.6	2.7	1.08	1.31	0.13	2.39	26	0	120	80	93	98	0	92
1	2023-05-27T07:41:10.864603844Z	31.1	43.2	1.61	0.73	2.58	2.71	1.09	1.31	0.13	2.39	26	0	120	80	93	98	0	92
1	2023-05-27T07:41:14.345821298Z	31.1	43.5	1.62	0.73	2.58	2.71	1.1	1.32	0.13	2.4	26	0	120	80	93	98	0	92
1	2023-05-27T07:41:18.252549097Z	31.2	43.9	1.62	0.74	2.57	2.71	1.1	1.32	0.13	2.4	26	0	120	80	93	98	0	92
1	2023-05-27T07:41:21.110414102Z	31.2	44.1	1.63	0.74	2.55	2.72	1.11	1.33	0.13	2.41	26	0	120	80	93	98	0	92
1	2023-05-27T07:41:24.387488175Z	31.3	44.4	1.63	0.74	2.54	2.72	1.11	1.33	0.13	2.41	26	0	120	80	93	98	0	92
1	2023-05-27T07:41:27.253572289Z	31.4	44.7	1.63	0.74	2.53	2.72	1.12	1.33	0.13	2.41	26	0	120	80	93	98	0	92
1	2023-05-27T07:41:30.163438493Z	31.4	44.9	1.63	0.74	2.52	2.72	1.12	1.33	0.13	2.42	26	0	120	80	93	98	0	92
1	2023-05-27T07:41:33.459951983Z	31.4	45.2	1.63	0.74	2.51	2.72	1.12	1.34	0.13	2.42	26	0	120	80	93	98	0	92
1	2023-05-27T07:41:36.452993312Z	31.5	45.5	1.63	0.74	2.5	2.72	1.12	1.34	0.13	2.42	26	0	120	80	93	98	0	92
1	2023-05-27T07:41:39.139556589Z	31.6	45.8	1.64	0.74	2.48	2.72	1.13	1.34	0.13	2.43	26	0	120	80	93	98	0	92
1	2023-05-27T07:41:42.601688721Z	31.6	46.1	1.64	0.74	2.47	2.72	1.13	1.34	0.13	2.43	26	0	120	80	93	98	0	92
1	2023-05-27T07:41:45.66677888Z	31.6	46.2	1.64	0.74	2.46	2.72	1.13	1.34	0.13	2.43	26	0	120	80	93	98	0	92
1	2023-05-27T07:41:49.202964125Z	31.7	46.5	1.64	0.75	2.45	2.72	1.13	1.34	0.13	2.44	26	0	120	80	93	98	0	92
1	2023-05-27T07:41:52.643611565Z	31.8	46.8	1.64	0.74	2.43	2.72	1.13	1.34	0.13	2.44	26	0	120	80	93	98	0	92
1	2023-05-27T07:41:55.092970666Z	31.8	47	1.65	0.75	2.42	2.72	1.14	1.35	0.13	2.44	26	0	120	80	93	98	0	92
1	2023-05-27T07:41:58.427287008Z	31.9	47.3	1.65	0.75	2.42	2.72	1.14	1.35	0.13	2.45	26	0	120	80	93	98	0	92
1	2023-05-27T07:42:01.453692176Z	31.9	47.5	1.65	0.75	2.41	2.72	1.14	1.35	0.13	2.45	26	0	120	80	93	98	0	92
1	2023-05-27T07:42:04.304191576Z	32	47.8	1.65	0.75	2.4	2.72	1.14	1.36	0.13	2.45	26	0	120	80	93	98	0	92
1	2023-05-27T07:42:07.158972478Z	32	48	1.65	0.75	2.39	2.71	1.15	1.36	0.13	2.46	26	0	120	80	93	98	0	92
1	2023-05-27T07:42:10.889940253Z	32	48.2	1.65	0.75	2.38	2.71	1.15	1.36	0.13	2.45	26	0	120	80	93	98	0	92
1	2023-05-27T07:42:13.5197994Z	32.1	48.4	1.66	0.75	2.37	2.71	1.15	1.36	0.13	2.46	26	0	120	80	93	98	0	92
1	2023-05-27T07:42:17.004599626Z	32.1	48.6	1.66	0.75	2.35	2.71	1.14	1.36	0.12	2.47	26	0	120	80	93	98	0	92
1	2023-05-27T07:42:20.305005731Z	32.2	48.8	1.65	0.75	2.24	2.61	1.12	1.35	0.12	2.41	26	0	120	80	93	98	0	92
1	2023-05-27T07:42:23.378831484Z	32.2	46.2	1.63	0.76	1.97	2.45	1.07	1.32	0.12	2.3	26	0	120	80	93	98	0	92
1	2023-05-27T07:42:27.249785116Z	32.2	43.1	1.55	0.76	1.84	2.39	1.03	1.28	0.12	2.27	26	0	120	80	93	98	0	92
1	2023-05-27T07:42:30.627718406Z	32.2	40.4	1.48	0.76	1.64	2.24	1	1.23	0.12	2.24	26	0	120	80	93	98	0	92
1	2023-05-27T07:42:34.21854892Z	32.2	38.4	1.43	0.76	1.47	2.11	0.96	1.2	0.12	2.22	26	0	120	80	93	98	0	92
1	2023-05-27T07:42:36.86181136Z	32.2	37.7	1.4	0.76	1.36	2.01	0.93	1.17	0.12	2.2	26	0	120	80	93	98	0	92
1	2023-05-27T07:42:40.139867062Z	32.3	37.1	1.37	0.76	1.29	1.94	0.92	1.15	0.12	2.18	26	0	120	80	93	98	0	92
1	2023-05-27T07:42:44.496651599Z	32.2	36.3	1.35	0.76	1.21	1.84	0.89	1.12	0.12	2.18	26	0	120	80	93	98	0	92
1	2023-05-27T07:42:47.715973159Z	32.2	36.2	1.32	0.76	1.14	1.73	0.87	1.1	0.12	2.15	26	0	120	80	93	98	0	92
1	2023-05-27T07:42:50.997550178Z	32.2	35.9	1.31	0.76	1.09	1.67	0.85	1.08	0.12	2.15	26	0	120	80	93	98	0	92
1	2023-05-27T07:42:54.707254642Z	32.2	35.6	1.3	0.76	1.06	1.62	0.84	1.07	0.12	2.16	26	0	120	80	93	98	0	92
1	2023-05-27T07:42:58.369559158Z	32.2	35.5	1.29	0.77	1.04	1.56	0.82	1.06	0.12	2.15	26	0	120	80	93	98	0	92
1	2023-05-27T07:43:01.632305251Z	32.2	35.3	1.28	0.77	1.02	1.51	0.81	1.04	0.12	2.15	26	0	120	80	93	98	0	92
1	2023-05-27T07:43:04.502023911Z	32.3	35.2	1.27	0.76	1.01	1.48	0.8	1.04	0.12	2.14	26	0	120	80	93	98	0	92
1	2023-05-27T07:43:07.846229611Z	32.3	35.1	1.27	0.76	1	1.45	0.79	1.04	0.12	2.14	26	0	120	80	93	98	0	92
1	2023-05-27T07:43:10.881755504Z	32.3	35	1.26	0.76	0.99	1.44	0.78	1.03	0.12	2.13	26	0	120	80	93	98	0	92
1	2023-05-27T07:43:14.383728773Z	32.3	34.8	1.25	0.77	0.98	1.41	0.78	1.03	0.12	2.13	26	0	120	80	93	98	0	92
1	2023-05-27T07:43:18.097246462Z	32.3	34.8	1.25	0.77	0.98	1.39	0.77	1.02	0.12	2.14	26	0	120	80	93	98	0	92
1	2023-05-27T07:43:21.309402558Z	32.3	34.6	1.24	0.77	0.97	1.36	0.76	1.02	0.12	2.13	26	0	120	80	93	98	0	92
1	2023-05-27T07:43:24.171618445Z	32.3	34.6	1.24	0.77	0.97	1.33	0.76	1.01	0.12	2.13	26	0	120	80	93	98	0	92
1	2023-05-27T07:43:27.494868728Z	32.3	34.4	1.24	0.77	0.96	1.31	0.75	1.01	0.12	2.13	26	0	120	80	93	98	0	92
1	2023-05-27T07:43:30.527534515Z	32.3	34.4	1.23	0.77	0.96	1.29	0.75	1.01	0.12	2.12	26	0	120	80	93	98	0	92
1	2023-05-27T07:43:33.614352564Z	32.3	34.3	1.23	0.77	0.95	1.28	0.74	1	0.12	2.13	26	0	120	80	93	98	0	92
1	2023-05-27T07:43:36.453962386Z	32.3	34.3	1.23	0.77	0.95	1.27	0.74	1	0.12	2.13	26	0	120	80	93	98	0	92
1	2023-05-27T07:43:40.154925227Z	32.3	34.3	1.23	0.77	0.95	1.26	0.73	0.99	0.12	2.06	26	0	120	80	93	98	0	92
1	2023-05-27T07:43:43.701984801Z	32.3	34.4	1.22	0.76	0.9	1.27	0.65	0.98	0.12	1.81	26	0	120	80	93	98	0	92
1	2023-05-27T07:43:46.953837298Z	31.7	33.9	1.21	0.75	0.86	1.28	0.63	1.02	0.12	3.09	26	0	120	80	93	98	0	92
1	2023-05-27T07:43:51.34925988Z	31.5	34	1.23	0.74	0.89	1.28	0.7	1.03	0.12	3.46	26	0	120	80	93	98	0	92
1	2023-05-27T07:43:54.692706566Z	31.6	34.2	1.22	0.72	0.85	1.28	0.7	1.03	0.12	3.17	26	0	120	80	93	98	0	92
1	2023-05-27T07:43:58.17943483Z	31.3	34.4	1.24	0.72	0.89	1.28	0.74	1.04	0.12	3.03	26	0	120	80	93	98	0	92
1	2023-05-27T07:44:02.067425446Z	31.4	34.8	1.24	0.71	0.89	1.24	0.75	1.03	0.12	2.76	26	0	120	80	93	98	0	92
1	2023-05-27T07:44:05.14678306Z	31.4	34.8	1.21	0.71	0.81	1.21	0.72	1.03	0.12	2.45	26	0	120	80	93	98	0	92
1	2023-05-27T07:44:08.337639913Z	31.3	34.8	1.22	0.7	0.75	1.23	0.68	1.02	0.12	2.07	26	0	120	80	93	98	0	92
1	2023-05-27T07:44:11.269836039Z	31.1	34.7	1.25	0.69	0.82	1.26	0.73	1.05	0.12	2.41	26	0	120	80	93	98	0	92
1	2023-05-27T07:44:14.557929893Z	31.1	35	1.23	0.69	0.8	1.25	0.69	1.02	0.12	2.08	26	0	120	80	93	98	0	92
1	2023-05-27T07:44:17.619115068Z	31	35.1	1.27	0.68	0.85	1.25	0.74	1.06	0.12	2.42	26	0	120	80	93	98	0	92
1	2023-05-27T07:44:21.106313823Z	31	35.1	1.25	0.68	0.8	1.23	0.72	1.06	0.12	2.25	26	0	120	80	93	98	0	92
1	2023-05-27T07:44:24.424937913Z	30.9	35	1.25	0.67	0.78	1.25	0.68	1.05	0.12	2.2	26	0	120	80	93	98	0	92
1	2023-05-27T07:44:28.091794086Z	30.7	35	1.27	0.66	0.84	1.24	0.74	1.07	0.12	2.48	26	0	120	80	93	98	0	92
1	2023-05-27T07:44:30.57489179Z	30.7	35	1.23	0.66	0.79	1.2	0.71	1.04	0.12	2.14	26	0	120	80	93	98	0	92
1	2023-05-27T07:44:34.001658017Z	30.6	35.1	1.21	0.65	0.76	1.22	0.62	0.99	0.12	1.75	26	0	120	80	93	98	0	92
1	2023-05-27T07:44:36.887223132Z	30.4	35.2	1.27	0.65	0.82	1.23	0.71	1.08	0.12	2.33	26	0	120	80	93	98	0	92
1	2023-05-27T07:44:39.734862601Z	30.4	35.3	1.26	0.64	0.79	1.21	0.71	1.08	0.12	2.19	26	0	120	80	93	98	0	92
2	2023-05-27T07:44:42.670993546Z	30.1	35.2	1.24	0.64	0.76	1.23	0.63	1.05	0.12	2.04	64	0	140	80	101	98	1	301	pain, eye irritation, kidney issue, uric acid is high
2	2023-05-27T07:44:45.698631583Z	29.9	35.3	1.26	0.63	0.78	1.23	0.67	1.08	0.12	2.32	64	0	140	80	101	98	1	301	pain, eye irritation, kidney issue, uric acid is high
2	2023-05-27T07:44:48.550607351Z	29.9	35.5	1.27	0.63	0.8	1.22	0.73	1.09	0.12	2.51	64	0	140	80	101	98	1	301	pain, eye irritation, kidney issue, uric acid is high
2	2023-05-27T07:44:51.012005253Z	29.8	35.6	1.27	0.62	0.82	1.21	0.79	1.1	0.12	2.59	64	0	140	80	101	98	1	301	pain, eye irritation, kidney issue, uric acid is high
2	2023-05-27T07:44:54.492406528Z	29.8	35.8	1.27	0.62	0.83	1.19	0.81	1.09	0.12	2.55	64	0	140	80	101	98	1	301	pain, eye irritation, kidney issue, uric acid is high
2	2023-05-27T07:44:57.76539996Z	29.9	36	1.27	0.62	0.82	1.16	0.82	1.07	0.12	2.47	64	0	140	80	101	98	1	301	pain, eye irritation, kidney issue, uric acid is high
2	2023-05-27T07:45:01.083234118Z	29.9	36.3	1.26	0.62	0.82	1.15	0.81	1.07	0.12	2.38	64	0	140	80	101	98	1	301	pain, eye irritation, kidney issue, uric acid is high
2	2023-05-27T07:45:03.922824674Z	29.9	36.5	1.26	0.63	0.81	1.13	0.8	1.05	0.12	2.27	64	0	140	80	101	98	1	301	pain, eye irritation, kidney issue, uric acid is high
2	2023-05-27T07:45:06.983143593Z	29.9	36.6	1.21	0.63	0.75	1.14	0.72	1.03	0.12	1.83	64	0	140	80	101	98	1	301	pain, eye irritation, kidney issue, uric acid is high
2	2023-05-27T07:45:10.126480858Z	29.8	36.5	1.26	0.63	0.76	1.19	0.73	1.07	0.12	1.97	64	0	140	80	101	98	1	301	pain, eye irritation, kidney issue, uric acid is high
2	2023-05-27T07:45:13.165687106Z	29.7	36.5	1.28	0.62	0.81	1.19	0.76	1.08	0.12	2.26	64	0	140	80	101	98	1	301	pain, eye irritation, kidney issue, uric acid is high
2	2023-05-27T07:45:16.240417914Z	29.7	36.6	1.29	0.63	0.82	1.17	0.78	1.08	0.12	2.34	64	0	140	80	101	98	1	301	pain, eye irritation, kidney issue, uric acid is high
2	2023-05-27T07:45:19.462262615Z	29.7	36.7	1.28	0.63	0.82	1.15	0.79	1.08	0.12	2.32	64	0	140	80	101	98	1	301	pain, eye irritation, kidney issue, uric acid is high
2	2023-05-27T07:45:23.594195068Z	29.7	36.8	1.28	0.63	0.82	1.13	0.79	1.07	0.12	2.29	64	0	140	80	101	98	1	301	pain, eye irritation, kidney issue, uric acid is high
2	2023-05-27T07:45:27.326869892Z	29.7	36.9	1.27	0.63	0.82	1.12	0.78	1.06	0.12	2.26	64	0	140	80	101	98	1	301	pain, eye irritation, kidney issue, uric acid is high
2	2023-05-27T07:45:30.350857439Z	29.7	36.9	1.26	0.64	0.82	1.12	0.77	1.06	0.12	2.24	64	0	140	80	101	98	1	301	pain, eye irritation, kidney issue, uric acid is high
2	2023-05-27T07:45:33.820777135Z	29.7	36.9	1.26	0.64	0.83	1.11	0.76	1.05	0.12	2.22	64	0	140	80	101	98	1	301	pain, eye irritation, kidney issue, uric acid is high
2	2023-05-27T07:45:36.688283474Z	29.7	36.9	1.26	0.64	0.83	1.1	0.75	1.05	0.12	2.2	64	0	140	80	101	98	1	301	pain, eye irritation, kidney issue, uric acid is high
2	2023-05-27T07:45:39.144988522Z	29.8	37.1	1.25	0.65	0.83	1.09	0.74	1.05	0.12	2.19	64	0	140	80	101	98	1	301	pain, eye irritation, kidney issue, uric acid is high
2	2023-05-27T07:45:42.231894464Z	29.8	36.9	1.25	0.65	0.83	1.1	0.74	1.04	0.12	2.19	64	0	140	80	101	98	1	301	pain, eye irritation, kidney issue, uric acid is high
2	2023-05-27T07:45:45.703489468Z	29.8	37	1.25	0.66	0.84	1.1	0.73	1.04	0.12	2.18	64	0	140	80	101	98	1	301	pain, eye irritation, kidney issue, uric acid is high
2	2023-05-27T07:45:48.550618373Z	29.8	37.2	1.25	0.66	0.84	1.1	0.73	1.04	0.12	2.17	64	0	140	80	101	98	1	301	pain, eye irritation, kidney issue, uric acid is high
2	2023-05-27T07:45:52.044138235Z	29.9	37.5	1.24	0.66	0.84	1.09	0.72	1.03	0.12	2.17	64	0	140	80	101	98	1	301	pain, eye irritation, kidney issue, uric acid is high
2	2023-05-27T07:45:55.319015845Z	29.9	37.4	1.22	0.67	0.8	1.08	0.61	1	0.12	1.64	64	0	140	80	101	98	1	301	pain, eye irritation, kidney issue, uric acid is high
2	2023-05-27T07:45:58.607483007Z	29.7	36.6	1.23	0.67	0.82	1.1	0.6	1.04	0.12	1.89	64	0	140	80	101	98	1	301	pain, eye irritation, kidney issue, uric acid is high
2	2023-05-27T07:46:02.317489692Z	29.7	36.5	1.24	0.66	0.83	1.1	0.67	1.05	0.12	2.13	64	0	140	80	101	98	1	301	pain, eye irritation, kidney issue, uric acid is high
2	2023-05-27T07:46:06.173552255Z	29.7	36.3	1.24	0.66	0.83	1.08	0.7	1.04	0.12	2.16	64	0	140	80	101	98	1	301	pain, eye irritation, kidney issue, uric acid is high
2	2023-05-27T07:46:09.698032483Z	29.7	36.3	1.23	0.66	0.83	1.08	0.72	1.04	0.12	2.16	64	0	140	80	101	98	1	301	pain, eye irritation, kidney issue, uric acid is high
2	2023-05-27T07:46:12.519133119Z	29.7	36.4	1.23	0.66	0.82	1.09	0.68	1.03	0.12	2.03	64	0	140	80	101	98	1	301	pain, eye irritation, kidney issue, uric acid is high
2	2023-05-27T07:46:15.38435399Z	29.6	36.3	1.23	0.66	0.82	1.09	0.71	1.04	0.12	2.15	64	0	140	80	101	98	1	301	pain, eye irritation, kidney issue, uric acid is high
2	2023-05-27T07:46:19.084443403Z	29.6	36.3	1.22	0.66	0.82	1.08	0.72	1.04	0.12	2.18	64	0	140	80	101	98	1	301	pain, eye irritation, kidney issue, uric acid is high
2	2023-05-27T07:46:22.799016721Z	29.6	36.4	1.22	0.66	0.82	1.06	0.73	1.03	0.12	2.18	64	0	140	80	101	98	1	301	pain, eye irritation, kidney issue, uric acid is high
2	2023-05-27T07:46:26.059275087Z	29.7	36.6	1.22	0.66	0.82	1.06	0.73	1.03	0.12	2.18	64	0	140	80	101	98	1	301	pain, eye irritation, kidney issue, uric acid is high
2	2023-05-27T07:46:29.954999505Z	29.7	37	1.22	0.66	0.83	1.05	0.73	1.02	0.12	2.17	64	0	140	80	101	98	1	301	pain, eye irritation, kidney issue, uric acid is high
2	2023-05-27T07:46:33.415909234Z	29.7	37.3	1.22	0.66	0.83	1.05	0.73	1.02	0.12	2.17	64	0	140	80	101	98	1	301	pain, eye irritation, kidney issue, uric acid is high
2	2023-05-27T07:46:36.892970406Z	29.7	37.8	1.22	0.67	0.84	1.06	0.72	1.02	0.12	2.18	64	0	140	80	101	98	1	301	pain, eye irritation, kidney issue, uric acid is high
2	2023-05-27T07:46:39.552325195Z	29.8	38.2	1.22	0.67	0.85	1.06	0.72	1.02	0.12	2.18	64	0	140	80	101	98	1	301	pain, eye irritation, kidney issue, uric acid is high
2	2023-05-27T07:46:42.612706823Z	29.8	38.6	1.22	0.67	0.87	1.07	0.72	1.03	0.12	2.19	64	0	140	80	101	98	1	301	pain, eye irritation, kidney issue, uric acid is high
2	2023-05-27T07:46:45.312142807Z	29.9	39	1.24	0.68	0.99	1.14	0.74	1.04	0.12	2.19	64	0	140	80	101	98	1	301	pain, eye irritation, kidney issue, uric acid is high
2	2023-05-27T07:46:49.012606443Z	29.9	39.5	1.31	0.68	1.55	1.54	0.8	1.09	0.12	2.21	64	0	140	80	101	98	1	301	pain, eye irritation, kidney issue, uric acid is high
2	2023-05-27T07:46:52.879751731Z	29.9	39.3	1.4	0.68	2.1	1.94	0.86	1.15	0.12	2.26	64	0	140	80	101	98	1	301	pain, eye irritation, kidney issue, uric acid is high
2	2023-05-27T07:46:56.041003214Z	30	39	1.46	0.68	2.46	2.19	0.93	1.2	0.12	2.3	64	0	140	80	101	98	1	301	pain, eye irritation, kidney issue, uric acid is high
2	2023-05-27T07:46:59.634584919Z	30	38.8	1.5	0.69	2.61	2.34	0.97	1.22	0.12	2.32	64	0	140	80	101	98	1	301	pain, eye irritation, kidney issue, uric acid is high
2	2023-05-27T07:47:03.102374851Z	30	38.9	1.53	0.69	2.69	2.45	0.99	1.24	0.12	2.33	64	0	140	80	101	98	1	301	pain, eye irritation, kidney issue, uric acid is high
2	2023-05-27T07:47:06.622032358Z	30.1	39.2	1.55	0.69	2.73	2.53	1.02	1.26	0.12	2.34	64	0	140	80	101	98	1	301	pain, eye irritation, kidney issue, uric acid is high
2	2023-05-27T07:47:09.870405692Z	30.1	39.5	1.56	0.69	2.75	2.58	1.03	1.27	0.12	2.35	64	0	140	80	101	98	1	301	pain, eye irritation, kidney issue, uric acid is high
2	2023-05-27T07:47:13.960546588Z	30.2	40	1.57	0.69	2.75	2.61	1.05	1.28	0.12	2.35	64	0	140	80	101	98	1	301	pain, eye irritation, kidney issue, uric acid is high
2	2023-05-27T07:47:17.462402247Z	30.2	40.2	1.58	0.7	2.75	2.64	1.07	1.29	0.12	2.36	64	0	140	80	101	98	1	301	pain, eye irritation, kidney issue, uric acid is high
2	2023-05-27T07:47:20.711682558Z	30.2	40.7	1.59	0.7	2.74	2.66	1.08	1.29	0.12	2.36	64	0	140	80	101	98	1	301	pain, eye irritation, kidney issue, uric acid is high
2	2023-05-27T07:47:23.416140948Z	30.3	41	1.6	0.7	2.74	2.68	1.09	1.3	0.12	2.37	64	0	140	80	101	98	1	301	pain, eye irritation, kidney issue, uric acid is high
2	2023-05-27T07:47:26.935571975Z	30.3	41.4	1.6	0.7	2.73	2.69	1.1	1.3	0.12	2.37	64	0	140	80	101	98	1	301	pain, eye irritation, kidney issue, uric acid is high
2	2023-05-27T07:47:30.583615444Z	30.4	41.7	1.6	0.71	2.72	2.7	1.1	1.3	0.12	2.38	64	0	140	80	101	98	1	301	pain, eye irritation, kidney issue, uric acid is high
2	2023-05-27T07:47:33.814096586Z	30.4	42	1.61	0.71	2.72	2.71	1.11	1.31	0.12	2.38	64	0	140	80	101	98	1	301	pain, eye irritation, kidney issue, uric acid is high
2	2023-05-27T07:47:37.932289278Z	30.5	42.3	1.61	0.71	2.71	2.71	1.11	1.31	0.12	2.39	64	0	140	80	101	98	1	301	pain, eye irritation, kidney issue, uric acid is high
2	2023-05-27T07:47:41.18661572Z	30.6	42.7	1.61	0.72	2.69	2.72	1.12	1.32	0.12	2.39	64	0	140	80	101	98	1	301	pain, eye irritation, kidney issue, uric acid is high
2	2023-05-27T07:47:45.297507966Z	30.7	43.1	1.62	0.72	2.68	2.72	1.12	1.32	0.12	2.4	64	0	140	80	101	98	1	301	pain, eye irritation, kidney issue, uric acid is high
2	2023-05-27T07:47:49.702941534Z	30.7	43.3	1.62	0.72	2.67	2.72	1.13	1.32	0.12	2.4	64	0	140	80	101	98	1	301	pain, eye irritation, kidney issue, uric acid is high
2	2023-05-27T07:47:53.696709035Z	30.8	43.7	1.62	0.72	2.65	2.72	1.13	1.32	0.12	2.4	64	0	140	80	101	98	1	301	pain, eye irritation, kidney issue, uric acid is high
2	2023-05-27T07:47:56.56667569Z	30.9	44.1	1.63	0.72	2.64	2.72	1.13	1.33	0.12	2.41	64	0	140	80	101	98	1	301	pain, eye irritation, kidney issue, uric acid is high
2	2023-05-27T07:48:00.487606394Z	31	44.4	1.63	0.73	2.63	2.72	1.14	1.33	0.12	2.42	64	0	140	80	101	98	1	301	pain, eye irritation, kidney issue, uric acid is high
2	2023-05-27T07:48:04.152662232Z	31.1	44.7	1.63	0.73	2.62	2.72	1.14	1.33	0.12	2.42	64	0	140	80	101	98	1	301	pain, eye irritation, kidney issue, uric acid is high
2	2023-05-27T07:48:07.821501091Z	31.1	45	1.63	0.73	2.6	2.72	1.14	1.33	0.12	2.43	64	0	140	80	101	98	1	301	pain, eye irritation, kidney issue, uric acid is high
2	2023-05-27T07:48:10.888625317Z	31.2	45.3	1.63	0.73	2.59	2.72	1.15	1.33	0.12	2.43	64	0	140	80	101	98	1	301	pain, eye irritation, kidney issue, uric acid is high
2	2023-05-27T07:48:14.406280808Z	31.3	45.6	1.63	0.73	2.58	2.72	1.15	1.33	0.12	2.44	64	0	140	80	101	98	1	301	pain, eye irritation, kidney issue, uric acid is high
2	2023-05-27T07:48:17.658423938Z	31.3	45.8	1.64	0.73	2.56	2.72	1.15	1.34	0.12	2.44	64	0	140	80	101	98	1	301	pain, eye irritation, kidney issue, uric acid is high
2	2023-05-27T07:48:21.13569853Z	31.4	46.1	1.64	0.74	2.56	2.73	1.15	1.34	0.13	2.45	64	0	140	80	101	98	1	301	pain, eye irritation, kidney issue, uric acid is high
2	2023-05-27T07:48:24.661278714Z	31.5	46.4	1.64	0.74	2.45	2.65	1.13	1.33	0.13	2.37	64	0	140	80	101	98	1	301	pain, eye irritation, kidney issue, uric acid is high
2	2023-05-27T07:48:27.891192015Z	31.5	44.8	1.58	0.74	2.3	2.57	1.07	1.3	0.13	2.3	64	0	140	80	101	98	1	301	pain, eye irritation, kidney issue, uric acid is high
2	2023-05-27T07:48:32.006700753Z	31.6	41.8	1.53	0.75	2.06	2.45	1.04	1.27	0.13	2.27	64	0	140	80	101	98	1	301	pain, eye irritation, kidney issue, uric acid is high
2	2023-05-27T07:48:35.274460211Z	31.6	39.9	1.48	0.75	1.78	2.31	0.99	1.23	0.13	2.23	64	0	140	80	101	98	1	301	pain, eye irritation, kidney issue, uric acid is high
2	2023-05-27T07:48:39.19066364Z	31.6	38.4	1.45	0.75	1.64	2.22	0.96	1.2	0.13	2.21	64	0	140	80	101	98	1	301	pain, eye irritation, kidney issue, uric acid is high
2	2023-05-27T07:48:43.038747144Z	31.6	37.7	1.41	0.75	1.46	2.08	0.94	1.16	0.13	2.21	64	0	140	80	101	98	1	301	pain, eye irritation, kidney issue, uric acid is high
2	2023-05-27T07:48:46.1298731Z	31.6	37.4	1.38	0.75	1.35	2	0.91	1.14	0.13	2.19	64	0	140	80	101	98	1	301	pain, eye irritation, kidney issue, uric acid is high
2	2023-05-27T07:48:48.983909361Z	31.6	37.2	1.36	0.76	1.27	1.93	0.89	1.12	0.13	2.19	64	0	140	80	101	98	1	301	pain, eye irritation, kidney issue, uric acid is high
2	2023-05-27T07:48:51.854032453Z	31.6	36.7	1.34	0.76	1.21	1.86	0.88	1.11	0.13	2.17	64	0	140	80	101	98	1	301	pain, eye irritation, kidney issue, uric acid is high
2	2023-05-27T07:48:55.37706679Z	31.6	36.2	1.33	0.76	1.16	1.79	0.87	1.1	0.13	2.16	64	0	140	80	101	98	1	301	pain, eye irritation, kidney issue, uric acid is high
2	2023-05-27T07:48:58.614658777Z	31.6	36	1.32	0.76	1.11	1.72	0.86	1.09	0.13	2.16	64	0	140	80	101	98	1	301	pain, eye irritation, kidney issue, uric acid is high
2	2023-05-27T07:49:02.099085091Z	31.7	35.9	1.32	0.76	1.08	1.67	0.85	1.08	0.13	2.17	64	0	140	80	101	98	1	301	pain, eye irritation, kidney issue, uric acid is high
2	2023-05-27T07:49:05.606544611Z	31.7	35.8	1.31	0.76	1.05	1.61	0.83	1.08	0.13	2.16	64	0	140	80	101	98	1	301	pain, eye irritation, kidney issue, uric acid is high
2	2023-05-27T07:49:08.855175979Z	31.7	35.6	1.3	0.76	1.04	1.57	0.83	1.07	0.13	2.16	64	0	140	80	101	98	1	301	pain, eye irritation, kidney issue, uric acid is high
2	2023-05-27T07:49:12.130310203Z	31.7	35.7	1.3	0.76	1.02	1.54	0.82	1.07	0.13	2.16	64	0	140	80	101	98	1	301	pain, eye irritation, kidney issue, uric acid is high
2	2023-05-27T07:49:15.876708842Z	31.7	35.5	1.29	0.76	1.01	1.52	0.81	1.06	0.13	2.16	64	0	140	80	101	98	1	301	pain, eye irritation, kidney issue, uric acid is high
2	2023-05-27T07:49:19.098960473Z	31.6	35.4	1.29	0.76	0.99	1.48	0.8	1.05	0.13	2.15	64	0	140	80	101	98	1	301	pain, eye irritation, kidney issue, uric acid is high
2	2023-05-27T07:49:23.195185023Z	31.7	35.4	1.28	0.77	0.99	1.44	0.79	1.05	0.13	2.16	64	0	140	80	101	98	1	301	pain, eye irritation, kidney issue, uric acid is high
2	2023-05-27T07:49:26.725181037Z	31.7	35.5	1.27	0.77	0.98	1.4	0.79	1.05	0.13	2.15	64	0	140	80	101	98	1	301	pain, eye irritation, kidney issue, uric acid is high
2	2023-05-27T07:49:29.753063287Z	31.7	35.5	1.27	0.77	0.97	1.38	0.78	1.04	0.13	2.15	64	0	140	80	101	98	1	301	pain, eye irritation, kidney issue, uric acid is high
2	2023-05-27T07:49:33.441005167Z	31.7	35.2	1.27	0.77	0.97	1.37	0.77	1.04	0.13	2.16	64	0	140	80	101	98	1	301	pain, eye irritation, kidney issue, uric acid is high
2	2023-05-27T07:49:36.502325428Z	31.7	35.1	1.26	0.77	0.96	1.35	0.77	1.03	0.13	2.16	64	0	140	80	101	98	1	301	pain, eye irritation, kidney issue, uric acid is high
2	2023-05-27T07:49:39.606079774Z	31.8	35.4	1.26	0.77	0.96	1.34	0.77	1.03	0.13	2.16	64	0	140	80	101	98	1	301	pain, eye irritation, kidney issue, uric acid is high
2	2023-05-27T07:49:42.457295294Z	31.8	35.3	1.26	0.77	0.96	1.32	0.76	1.03	0.13	2.16	64	0	140	80	101	98	1	301	pain, eye irritation, kidney issue, uric acid is high
2	2023-05-27T07:49:45.341355455Z	31.8	35	1.26	0.77	0.95	1.31	0.76	1.03	0.13	2.16	64	0	140	80	101	98	1	301	pain, eye irritation, kidney issue, uric acid is high
2	2023-05-27T07:49:49.746991923Z	31.8	35	1.26	0.77	0.95	1.31	0.76	1.03	0.13	2.15	64	0	140	80	101	98	1	301	pain, eye irritation, kidney issue, uric acid is high
2	2023-05-27T07:49:53.13213413Z	31.8	34.9	1.25	0.77	0.91	1.28	0.71	1.04	0.13	1.91	64	0	140	80	101	98	1	301	pain, eye irritation, kidney issue, uric acid is high
2	2023-05-27T07:49:56.359408651Z	31.6	34.6	1.26	0.76	0.9	1.29	0.69	1.02	0.13	1.81	64	0	140	80	101	98	1	301	pain, eye irritation, kidney issue, uric acid is high
2	2023-05-27T07:49:59.856797043Z	31.2	34.2	1.26	0.75	0.87	1.28	0.56	1.01	0.13	1.4	64	0	140	80	101	98	1	301	pain, eye irritation, kidney issue, uric acid is high
2	2023-05-27T07:50:02.736715412Z	30.6	34.1	1.25	0.74	0.87	1.26	0.6	1.05	0.13	1.87	64	0	140	80	101	98	1	301	pain, eye irritation, kidney issue, uric acid is high
2	2023-05-27T07:50:06.195717648Z	30.6	34.3	1.26	0.73	0.87	1.25	0.64	1.07	0.13	1.89	64	0	140	80	101	98	1	301	pain, eye irritation, kidney issue, uric acid is high
2	2023-05-27T07:50:09.26977774Z	30.4	34.4	1.24	0.72	0.84	1.24	0.67	1.06	0.13	1.86	64	0	140	80	101	98	1	301	pain, eye irritation, kidney issue, uric acid is high
2	2023-05-27T07:50:11.934460097Z	30.2	34.4	1.24	0.71	0.81	1.23	0.65	1.04	0.13	1.82	64	0	140	80	101	98	1	301	pain, eye irritation, kidney issue, uric acid is high
2	2023-05-27T07:50:15.823751066Z	29.7	34.3	1.24	0.7	0.83	1.23	0.74	1.09	0.13	2.26	64	0	140	80	101	98	1	301	pain, eye irritation, kidney issue, uric acid is high
2	2023-05-27T07:50:19.709938533Z	29.9	34.6	1.24	0.69	0.81	1.22	0.7	1.07	0.13	2.21	64	0	140	80	101	98	1	301	pain, eye irritation, kidney issue, uric acid is high
2	2023-05-27T07:50:22.785335238Z	29.7	35	1.25	0.68	0.83	1.22	0.74	1.09	0.13	2.34	64	0	140	80	101	98	1	301	pain, eye irritation, kidney issue, uric acid is high
2	2023-05-27T07:50:26.689529145Z	29.8	35.4	1.24	0.67	0.82	1.21	0.73	1.08	0.13	2.25	64	0	140	80	101	98	1	301	pain, eye irritation, kidney issue, uric acid is high
2	2023-05-27T07:50:29.9527069Z	29.7	35.5	1.25	0.66	0.82	1.2	0.8	1.1	0.13	2.36	64	0	140	80	101	98	1	301	pain, eye irritation, kidney issue, uric acid is high
2	2023-05-27T07:50:34.866505967Z	29.7	35.8	1.25	0.66	0.82	1.17	0.84	1.08	0.13	2.34	64	0	140	80	101	98	1	301	pain, eye irritation, kidney issue, uric acid is high
2	2023-05-27T07:50:38.139916053Z	29.7	36	1.25	0.66	0.82	1.16	0.84	1.07	0.13	2.31	64	0	140	80	101	98	1	301	pain, eye irritation, kidney issue, uric acid is high
2	2023-05-27T07:50:41.436338857Z	29.7	36.1	1.25	0.66	0.81	1.17	0.75	1.03	0.13	1.9	64	0	140	80	101	98	1	301	pain, eye irritation, kidney issue, uric acid is high
2	2023-05-27T07:50:44.297488921Z	29.5	36.1	1.25	0.66	0.82	1.19	0.76	1.09	0.13	2.05	64	0	140	80	101	98	1	301	pain, eye irritation, kidney issue, uric acid is high
2	2023-05-27T07:50:47.770220395Z	29.5	36.1	1.26	0.66	0.83	1.18	0.79	1.1	0.13	2.23	64	0	140	80	101	98	1	301	pain, eye irritation, kidney issue, uric acid is high
2	2023-05-27T07:50:50.848587862Z	29.5	36.2	1.25	0.66	0.83	1.16	0.81	1.1	0.13	2.28	64	0	140	80	101	98	1	301	pain, eye irritation, kidney issue, uric acid is high
2	2023-05-27T07:50:54.132231388Z	29.6	36.4	1.25	0.66	0.82	1.15	0.81	1.09	0.13	2.27	64	0	140	80	101	98	1	301	pain, eye irritation, kidney issue, uric acid is high
2	2023-05-27T07:50:57.590419022Z	29.6	36.6	1.25	0.67	0.82	1.14	0.81	1.08	0.13	2.26	64	0	140	80	101	98	1	301	pain, eye irritation, kidney issue, uric acid is high
2	2023-05-27T07:51:00.497445481Z	29.7	37	1.25	0.67	0.83	1.14	0.8	1.07	0.13	2.25	64	0	140	80	101	98	1	301	pain, eye irritation, kidney issue, uric acid is high
2	2023-05-27T07:51:03.546748755Z	29.7	37.4	1.24	0.65	0.82	1.12	0.77	1.05	0.1	2.22	64	0	140	80	101	98	1	301	pain, eye irritation, kidney issue, uric acid is high
2	2023-05-27T07:51:07.217791118Z	29.7	37.8	1.23	0.65	0.82	1.11	0.75	1.04	0.1	2.2	64	0	140	80	101	98	1	301	pain, eye irritation, kidney issue, uric acid is high
2	2023-05-27T07:51:10.722610994Z	29.7	38.2	1.21	0.64	0.81	1.11	0.74	1.02	0.1	2.17	64	0	140	80	101	98	1	301	pain, eye irritation, kidney issue, uric acid is high
3	2023-05-27T07:52:10.928308586Z	30.4	43.4	1.43	0.44	0.9	2.43	0.29	1.12	0.1	2.44	79	0	150	70	71	99	1	156	Pain, weakness, treatment of ortho
3	2023-05-27T07:52:14.852075139Z	30.4	43	1.61	0.5	1.42	2.55	0.52	1.28	0.1	2.57	79	0	150	70	71	99	1	156	Pain, weakness, treatment of ortho
3	2023-05-27T07:52:18.102857639Z	30.4	42.7	1.63	0.49	1.81	2.59	0.76	1.3	0.1	2.47	79	0	150	70	71	99	1	156	Pain, weakness, treatment of ortho
3	2023-05-27T07:52:20.957303407Z	30.4	42.2	1.64	0.48	2.11	2.68	0.92	1.33	0.1	2.44	79	0	150	70	71	99	1	156	Pain, weakness, treatment of ortho
3	2023-05-27T07:52:24.442358229Z	30.4	41.5	1.76	0.54	2.39	2.78	1.08	1.44	0.1	2.47	79	0	150	70	71	99	1	156	Pain, weakness, treatment of ortho
3	2023-05-27T07:52:28.348565784Z	30.4	40.9	1.74	0.54	2.51	2.77	1.15	1.43	0.1	2.42	79	0	150	70	71	99	1	156	Pain, weakness, treatment of ortho
3	2023-05-27T07:52:31.443740995Z	30.4	40.6	1.7	0.51	2.58	2.81	1.16	1.38	0.1	2.34	79	0	150	70	71	99	1	156	Pain, weakness, treatment of ortho
3	2023-05-27T07:52:34.263246079Z	30.5	40.7	1.71	0.51	2.65	2.87	1.17	1.4	0.1	2.33	79	0	150	70	71	99	1	156	Pain, weakness, treatment of ortho
3	2023-05-27T07:52:38.17001614Z	30.5	40.8	1.71	0.51	2.65	2.87	1.18	1.39	0.1	2.3	79	0	150	70	71	99	1	156	Pain, weakness, treatment of ortho
3	2023-05-27T07:52:41.632445559Z	30.5	41	1.72	0.5	2.68	2.88	1.18	1.4	0.1	2.28	79	0	150	70	71	99	1	156	Pain, weakness, treatment of ortho
3	2023-05-27T07:52:45.54248275Z	30.5	41.3	1.75	0.52	2.7	2.96	1.2	1.44	0.1	2.31	79	0	150	70	71	99	1	156	Pain, weakness, treatment of ortho
3	2023-05-27T07:52:48.790962825Z	30.6	41.7	1.73	0.51	2.65	2.93	1.2	1.43	0.1	2.29	79	0	150	70	71	99	1	156	Pain, weakness, treatment of ortho
3	2023-05-27T07:52:52.49214941Z	30.6	42.1	1.77	0.52	2.71	3	1.23	1.46	0.1	2.35	79	0	150	70	71	99	1	156	Pain, weakness, treatment of ortho
3	2023-05-27T07:52:55.783440113Z	30.6	42.3	1.82	0.56	2.7	2.97	1.27	1.5	0.1	2.36	79	0	150	70	71	99	1	156	Pain, weakness, treatment of ortho
3	2023-05-27T07:52:59.680207988Z	30.6	42.7	1.82	0.57	2.71	2.98	1.29	1.5	0.1	2.37	79	0	150	70	71	99	1	156	Pain, weakness, treatment of ortho
3	2023-05-27T07:53:03.58234819Z	30.7	43.1	1.82	0.57	2.71	2.99	1.3	1.5	0.1	2.37	79	0	150	70	71	99	1	156	Pain, weakness, treatment of ortho
3	2023-05-27T07:53:06.62554252Z	30.7	43.3	1.84	0.59	2.73	3	1.33	1.52	0.1	2.39	79	0	150	70	71	99	1	156	Pain, weakness, treatment of ortho
3	2023-05-27T07:53:09.488371267Z	30.8	43.8	1.84	0.6	2.72	2.99	1.34	1.52	0.1	2.39	79	0	150	70	71	99	1	156	Pain, weakness, treatment of ortho
3	2023-05-27T07:53:12.971027828Z	30.8	44.1	1.83	0.6	2.71	2.98	1.34	1.51	0.1	2.38	79	0	150	70	71	99	1	156	Pain, weakness, treatment of ortho
3	2023-05-27T07:53:16.295377398Z	30.9	44.4	1.81	0.6	2.68	2.96	1.33	1.49	0.1	2.36	79	0	150	70	71	99	1	156	Pain, weakness, treatment of ortho
3	2023-05-27T07:53:19.748296336Z	30.9	44.6	1.79	0.59	2.66	2.96	1.31	1.48	0.1	2.35	79	0	150	70	71	99	1	156	Pain, weakness, treatment of ortho
3	2023-05-27T07:53:23.528459388Z	30.9	44.9	1.77	0.58	2.64	2.95	1.29	1.46	0.1	2.33	79	0	150	70	71	99	1	156	Pain, weakness, treatment of ortho
3	2023-05-27T07:53:26.485508295Z	31	45.2	1.74	0.56	2.6	2.94	1.27	1.43	0.1	2.31	79	0	150	70	71	99	1	156	Pain, weakness, treatment of ortho
3	2023-05-27T07:53:30.38974913Z	31.1	45.6	1.72	0.55	2.57	2.94	1.25	1.42	0.1	2.3	79	0	150	70	71	99	1	156	Pain, weakness, treatment of ortho
3	2023-05-27T07:53:33.868394913Z	31.1	45.8	1.74	0.55	2.56	2.97	1.24	1.43	0.1	2.31	79	0	150	70	71	99	1	156	Pain, weakness, treatment of ortho
3	2023-05-27T07:53:37.354552171Z	31.2	46.2	1.77	0.56	2.56	2.98	1.26	1.46	0.1	2.34	79	0	150	70	71	99	1	156	Pain, weakness, treatment of ortho
3	2023-05-27T07:53:41.229897334Z	31.2	46.4	1.78	0.57	2.56	2.98	1.27	1.47	0.1	2.35	79	0	150	70	71	99	1	156	Pain, weakness, treatment of ortho
3	2023-05-27T07:53:44.32387788Z	31.3	46.7	1.79	0.58	2.55	2.98	1.29	1.48	0.1	2.36	79	0	150	70	71	99	1	156	Pain, weakness, treatment of ortho
3	2023-05-27T07:53:47.574166328Z	31.4	47	1.8	0.59	2.55	2.99	1.3	1.49	0.1	2.38	79	0	150	70	71	99	1	156	Pain, weakness, treatment of ortho
3	2023-05-27T07:53:51.40283203Z	31.4	47.2	1.8	0.59	2.53	2.98	1.31	1.49	0.1	2.38	79	0	150	70	71	99	1	156	Pain, weakness, treatment of ortho
3	2023-05-27T07:53:55.354904307Z	31.4	47.4	1.8	0.59	2.52	2.98	1.31	1.49	0.1	2.38	79	0	150	70	71	99	1	156	Pain, weakness, treatment of ortho
3	2023-05-27T07:53:59.104990902Z	31.5	47.7	1.8	0.6	2.5	2.97	1.31	1.49	0.1	2.38	79	0	150	70	71	99	1	156	Pain, weakness, treatment of ortho
3	2023-05-27T07:54:02.331539992Z	31.6	48	1.8	0.59	2.49	2.96	1.32	1.49	0.1	2.38	79	0	150	70	71	99	1	156	Pain, weakness, treatment of ortho
3	2023-05-27T07:44:30.57489179Z	30.7	35	1.23	0.66	0.79	1.2	0.71	1.04	0.12	2.14	79	0	150	70	71	99	1	156	Pain, weakness, treatment of ortho
3	2023-05-27T07:44:34.001658017Z	30.6	35.1	1.21	0.65	0.76	1.22	0.62	0.99	0.12	1.75	79	0	150	70	71	99	1	156	Pain, weakness, treatment of ortho
3	2023-05-27T07:44:36.887223132Z	30.4	35.2	1.27	0.65	0.82	1.23	0.71	1.08	0.12	2.33	79	0	150	70	71	99	1	156	Pain, weakness, treatment of ortho
3	2023-05-27T07:44:39.734862601Z	30.4	35.3	1.26	0.64	0.79	1.21	0.71	1.08	0.12	2.19	79	0	150	70	71	99	1	156	Pain, weakness, treatment of ortho
3	2023-05-27T07:44:42.670993546Z	30.1	35.2	1.24	0.64	0.76	1.23	0.63	1.05	0.12	2.04	79	0	150	70	71	99	1	156	Pain, weakness, treatment of ortho
3	2023-05-27T07:44:45.698631583Z	29.9	35.3	1.26	0.63	0.78	1.23	0.67	1.08	0.12	2.32	79	0	150	70	71	99	1	156	Pain, weakness, treatment of ortho
3	2023-05-27T07:44:48.550607351Z	29.9	35.5	1.27	0.63	0.8	1.22	0.73	1.09	0.12	2.51	79	0	150	70	71	99	1	156	Pain, weakness, treatment of ortho
3	2023-05-27T07:44:51.012005253Z	29.8	35.6	1.27	0.62	0.82	1.21	0.79	1.1	0.12	2.59	79	0	150	70	71	99	1	156	Pain, weakness, treatment of ortho
3	2023-05-27T07:44:54.492406528Z	29.8	35.8	1.27	0.62	0.83	1.19	0.81	1.09	0.12	2.55	79	0	150	70	71	99	1	156	Pain, weakness, treatment of ortho
3	2023-05-27T07:44:57.76539996Z	29.9	36	1.27	0.62	0.82	1.16	0.82	1.07	0.12	2.47	79	0	150	70	71	99	1	156	Pain, weakness, treatment of ortho
3	2023-05-27T07:45:01.083234118Z	29.9	36.3	1.26	0.62	0.82	1.15	0.81	1.07	0.12	2.38	79	0	150	70	71	99	1	156	Pain, weakness, treatment of ortho
3	2023-05-27T07:45:03.922824674Z	29.9	36.5	1.26	0.63	0.81	1.13	0.8	1.05	0.12	2.27	79	0	150	70	71	99	1	156	Pain, weakness, treatment of ortho
3	2023-05-27T07:45:06.983143593Z	29.9	36.6	1.21	0.63	0.75	1.14	0.72	1.03	0.12	1.83	79	0	150	70	71	99	1	156	Pain, weakness, treatment of ortho
4	2023-05-27T07:45:10.126480858Z	29.8	36.5	1.26	0.63	0.76	1.19	0.73	1.07	0.12	1.97	65	0	130	80	70	97	0	94	chest pain
4	2023-05-27T07:45:13.165687106Z	29.7	36.5	1.28	0.62	0.81	1.19	0.76	1.08	0.12	2.26	65	0	130	80	70	97	0	94	chest pain
4	2023-05-27T07:45:16.240417914Z	29.7	36.6	1.29	0.63	0.82	1.17	0.78	1.08	0.12	2.34	65	0	130	80	70	97	0	94	chest pain
4	2023-05-27T07:45:19.462262615Z	29.7	36.7	1.28	0.63	0.82	1.15	0.79	1.08	0.12	2.32	65	0	130	80	70	97	0	94	chest pain
4	2023-05-27T07:45:23.594195068Z	29.7	36.8	1.28	0.63	0.82	1.13	0.79	1.07	0.12	2.29	65	0	130	80	70	97	0	94	chest pain
4	2023-05-27T07:45:27.326869892Z	29.7	36.9	1.27	0.63	0.82	1.12	0.78	1.06	0.12	2.26	65	0	130	80	70	97	0	94	chest pain
4	2023-05-27T07:45:30.350857439Z	29.7	36.9	1.26	0.64	0.82	1.12	0.77	1.06	0.12	2.24	65	0	130	80	70	97	0	94	chest pain
4	2023-05-27T07:45:33.820777135Z	29.7	36.9	1.26	0.64	0.83	1.11	0.76	1.05	0.12	2.22	65	0	130	80	70	97	0	94	chest pain
4	2023-05-27T07:45:36.688283474Z	29.7	36.9	1.26	0.64	0.83	1.1	0.75	1.05	0.12	2.2	65	0	130	80	70	97	0	94	chest pain
4	2023-05-27T07:45:39.144988522Z	29.8	37.1	1.25	0.65	0.83	1.09	0.74	1.05	0.12	2.19	65	0	130	80	70	97	0	94	chest pain
4	2023-05-27T07:45:42.231894464Z	29.8	36.9	1.25	0.65	0.83	1.1	0.74	1.04	0.12	2.19	65	0	130	80	70	97	0	94	chest pain
4	2023-05-27T07:45:45.703489468Z	29.8	37	1.25	0.66	0.84	1.1	0.73	1.04	0.12	2.18	65	0	130	80	70	97	0	94	chest pain
4	2023-05-27T07:45:48.550618373Z	29.8	37.2	1.25	0.66	0.84	1.1	0.73	1.04	0.12	2.17	65	0	130	80	70	97	0	94	chest pain
4	2023-05-27T07:56:12.218480453Z	29.4	39.6	1.92	0.57	1.77	2.52	1.47	1.59	0.1	2.38	65	0	130	80	70	97	0	94	chest pain
4	2023-05-27T07:56:14.874554273Z	29.4	39.7	1.89	0.57	2.12	2.59	1.48	1.56	0.1	2.33	65	0	130	80	70	97	0	94	chest pain
4	2023-05-27T07:56:17.745399266Z	29.4	39.8	1.88	0.57	2.25	2.63	1.46	1.54	0.1	2.31	65	0	130	80	70	97	0	94	chest pain
4	2023-05-27T07:56:20.599166268Z	29.4	39.8	1.87	0.57	2.4	2.68	1.44	1.53	0.1	2.28	65	0	130	80	70	97	0	94	chest pain
4	2023-05-27T07:56:23.093643567Z	29.4	39.8	1.86	0.57	2.58	2.71	1.42	1.52	0.1	2.27	65	0	130	80	70	97	0	94	chest pain
4	2023-05-27T07:56:26.132095216Z	29.4	39.8	1.85	0.57	2.71	2.76	1.41	1.51	0.1	2.27	65	0	130	80	70	97	0	94	chest pain
4	2023-05-27T07:56:28.798090362Z	29.5	39.7	1.84	0.57	2.79	2.8	1.4	1.5	0.1	2.26	65	0	130	80	70	97	0	94	chest pain
4	2023-05-27T07:56:31.257695631Z	29.5	39.7	1.83	0.57	2.81	2.82	1.38	1.48	0.1	2.25	65	0	130	80	70	97	0	94	chest pain
4	2023-05-27T07:56:33.912067797Z	29.5	39.7	1.82	0.57	2.88	2.85	1.38	1.49	0.1	2.25	65	0	130	80	70	97	0	94	chest pain
4	2023-05-27T07:56:36.811321974Z	29.5	39.5	1.82	0.58	2.93	2.87	1.37	1.48	0.1	2.24	65	0	130	80	70	97	0	94	chest pain
4	2023-05-27T07:56:39.254348474Z	29.5	39.4	1.81	0.58	2.96	2.88	1.37	1.48	0.1	2.24	65	0	130	80	70	97	0	94	chest pain
4	2023-05-27T07:56:41.968243057Z	29.6	39.4	1.8	0.58	2.98	2.89	1.36	1.47	0.1	2.24	65	0	130	80	70	97	0	94	chest pain
4	2023-05-27T07:56:44.787344854Z	29.6	39.4	1.8	0.58	3.01	2.9	1.36	1.47	0.1	2.24	65	0	130	80	70	97	0	94	chest pain
4	2023-05-27T07:56:47.764240918Z	29.6	39.4	1.79	0.58	3.02	2.91	1.36	1.46	0.1	2.23	65	0	130	80	70	97	0	94	chest pain
4	2023-05-27T07:56:50.594478826Z	29.6	39.3	1.79	0.59	3.05	2.92	1.36	1.46	0.1	2.24	65	0	130	80	70	97	0	94	chest pain
4	2023-05-27T07:56:53.004372688Z	29.6	39.2	1.79	0.59	3.06	2.93	1.36	1.46	0.1	2.24	65	0	130	80	70	97	0	94	chest pain
4	2023-05-27T07:56:55.702015992Z	29.6	39.2	1.79	0.59	3.06	2.95	1.36	1.46	0.1	2.24	65	0	130	80	70	97	0	94	chest pain
4	2023-05-27T07:56:59.271146996Z	29.7	39.4	1.79	0.6	3.06	2.97	1.36	1.46	0.1	2.24	65	0	130	80	70	97	0	94	chest pain
4	2023-05-27T07:57:02.21363905Z	29.7	39.6	1.79	0.6	3.06	2.98	1.36	1.46	0.1	2.25	65	0	130	80	70	97	0	94	chest pain
4	2023-05-27T07:57:04.855591059Z	29.7	39.9	1.78	0.6	3.05	2.98	1.35	1.45	0.1	2.24	65	0	130	80	70	97	0	94	chest pain
4	2023-05-27T07:57:07.751365203Z	29.7	40.1	1.79	0.6	3.04	2.99	1.35	1.46	0.1	2.25	65	0	130	80	70	97	0	94	chest pain
4	2023-05-27T07:57:10.186789588Z	29.8	40.5	1.79	0.61	3.04	2.99	1.35	1.45	0.1	2.26	65	0	130	80	70	97	0	94	chest pain
4	2023-05-27T07:57:12.842523249Z	29.9	40.8	1.79	0.61	3.03	3	1.36	1.45	0.1	2.26	65	0	130	80	70	97	0	94	chest pain
4	2023-05-27T07:57:15.513054829Z	29.9	41	1.79	0.61	3.03	2.99	1.35	1.45	0.1	2.26	65	0	130	80	70	97	0	94	chest pain
4	2023-05-27T07:57:18.482885856Z	29.9	41.2	1.79	0.61	3.03	3	1.36	1.45	0.1	2.27	65	0	130	80	70	97	0	94	chest pain
4	2023-05-27T07:57:21.222113439Z	30	41.6	1.79	0.62	3	3	1.35	1.45	0.1	2.28	65	0	130	80	70	97	0	94	chest pain
4	2023-05-27T07:57:23.877351733Z	30	41.8	1.79	0.62	3	3	1.36	1.45	0.1	2.28	65	0	130	80	70	97	0	94	chest pain
4	2023-05-27T07:57:26.527051313Z	30.1	42.1	1.78	0.62	2.99	2.99	1.35	1.45	0.1	2.28	65	0	130	80	70	97	0	94	chest pain
4	2023-05-27T07:57:29.018450835Z	30.1	42.4	1.78	0.62	2.98	3	1.35	1.45	0.1	2.28	65	0	130	80	70	97	0	94	chest pain
4	2023-05-27T07:57:31.471283992Z	30.2	42.7	1.78	0.62	2.97	3	1.34	1.43	0.1	2.27	65	0	130	80	70	97	0	94	chest pain
4	2023-05-27T07:57:34.110374227Z	30.2	42.9	1.78	0.62	2.96	2.99	1.35	1.44	0.1	2.28	65	0	130	80	70	97	0	94	chest pain
4	2023-05-27T07:57:36.774511867Z	30.3	43.2	1.77	0.61	2.92	2.99	1.35	1.45	0.1	2.29	65	0	130	80	70	97	0	94	chest pain
4	2023-05-27T07:57:39.2242028Z	30.3	43.4	1.78	0.62	2.94	2.98	1.35	1.45	0.1	2.29	65	0	130	80	70	97	0	94	chest pain
4	2023-05-27T07:57:42.297912212Z	30.3	43.5	1.78	0.62	2.89	3.01	1.35	1.45	0.1	2.3	65	0	130	80	70	97	0	94	chest pain
4	2023-05-27T07:57:44.959328221Z	30.4	43.9	1.76	0.62	2.9	3	1.33	1.43	0.1	2.3	65	0	130	80	70	97	0	94	chest pain
4	2023-05-27T07:57:47.640576382Z	30.4	44.1	1.79	0.63	2.92	3.02	1.35	1.46	0.1	2.32	65	0	130	80	70	97	0	94	chest pain
4	2023-05-27T07:57:50.318418951Z	30.5	44.3	1.8	0.64	2.91	3.01	1.36	1.46	0.1	2.32	65	0	130	80	70	97	0	94	chest pain
4	2023-05-27T07:57:53.015111152Z	30.5	44.5	1.79	0.64	2.9	3	1.36	1.46	0.1	2.32	65	0	130	80	70	97	0	94	chest pain
4	2023-05-27T07:57:55.43430994Z	30.6	44.8	1.79	0.64	2.89	3	1.36	1.46	0.1	2.32	65	0	130	80	70	97	0	94	chest pain
4	2023-05-27T07:57:58.113405504Z	30.6	45	1.78	0.64	2.87	3	1.35	1.45	0.1	2.32	65	0	130	80	70	97	0	94	chest pain
4	2023-05-27T07:58:01.200766068Z	30.7	45.2	1.79	0.65	2.87	3	1.36	1.45	0.1	2.33	65	0	130	80	70	97	0	94	chest pain
4	2023-05-27T07:58:04.038504685Z	30.7	45.3	1.78	0.64	2.84	2.99	1.36	1.44	0.1	2.33	65	0	130	80	70	97	0	94	chest pain
4	2023-05-27T07:58:06.902896937Z	30.8	45.7	1.76	0.64	2.8	2.96	1.34	1.44	0.1	2.31	65	0	130	80	70	97	0	94	chest pain
4	2023-05-27T07:58:09.79527191Z	30.8	45.9	1.79	0.65	2.83	2.99	1.36	1.46	0.1	2.33	65	0	130	80	70	97	0	94	chest pain
4	2023-05-27T07:58:12.646881189Z	30.9	46.2	1.78	0.65	2.82	2.99	1.36	1.45	0.1	2.34	65	0	130	80	70	97	0	94	chest pain
4	2023-05-27T07:58:15.107400621Z	30.9	46.4	1.77	0.64	2.8	2.99	1.36	1.44	0.1	2.34	65	0	130	80	70	97	0	94	chest pain
4	2023-05-27T07:58:17.730308102Z	31	46.7	1.76	0.64	2.78	2.99	1.35	1.43	0.1	2.33	65	0	130	80	70	97	0	94	chest pain
4	2023-05-27T07:58:20.191598956Z	31	46.8	1.79	0.65	2.79	3	1.36	1.46	0.1	2.35	65	0	130	80	70	97	0	94	chest pain
4	2023-05-27T07:58:22.856916263Z	31.1	47	1.79	0.66	2.79	2.99	1.37	1.46	0.1	2.36	65	0	130	80	70	97	0	94	chest pain
4	2023-05-27T07:58:25.507489226Z	31.1	47.2	1.77	0.64	2.74	2.95	1.34	1.43	0.1	2.33	65	0	130	80	70	97	0	94	chest pain
4	2023-05-27T07:58:28.597443575Z	31.1	47.4	1.79	0.65	2.77	3	1.36	1.46	0.1	2.37	65	0	130	80	70	97	0	94	chest pain
4	2023-05-27T07:58:31.664298221Z	31.2	47.6	1.79	0.66	2.76	2.99	1.37	1.47	0.1	2.37	65	0	130	80	70	97	0	94	chest pain
4	2023-05-27T07:58:34.931416383Z	31.2	47.8	1.79	0.66	2.74	2.98	1.37	1.46	0.1	2.37	65	0	130	80	70	97	0	94	chest pain
4	2023-05-27T07:58:37.40418238Z	31.2	48.1	1.75	0.65	2.68	2.94	1.35	1.43	0.1	2.35	65	0	130	80	70	97	0	94	chest pain
4	2023-05-27T07:58:39.841814776Z	31.3	48.2	1.75	0.65	2.69	2.98	1.35	1.43	0.1	2.33	65	0	130	80	70	97	0	94	chest pain
4	2023-05-27T07:58:42.303318941Z	31.4	48.5	1.77	0.65	2.71	2.98	1.36	1.45	0.1	2.37	65	0	130	80	70	97	0	94	chest pain
4	2023-05-27T07:58:44.979860315Z	31.4	48.7	1.77	0.65	2.66	2.98	1.34	1.43	0.1	2.34	65	0	130	80	70	97	0	94	chest pain
4	2023-05-27T07:58:47.874546324Z	31.4	48.8	1.76	0.65	2.68	2.98	1.35	1.44	0.1	2.37	65	0	130	80	70	97	0	94	chest pain
4	2023-05-27T07:58:50.293061133Z	31.5	49	1.78	0.66	2.68	2.98	1.36	1.46	0.1	2.38	65	0	130	80	70	97	0	94	chest pain
4	2023-05-27T07:58:52.961852214Z	31.5	49.2	1.76	0.66	2.65	2.97	1.36	1.45	0.1	2.38	65	0	130	80	70	97	0	94	chest pain
4	2023-05-27T07:58:55.704901711Z	31.6	49.4	1.79	0.66	2.67	2.99	1.37	1.47	0.1	2.4	65	0	130	80	70	97	0	94	chest pain
4	2023-05-27T07:58:58.290236548Z	31.6	49.5	1.8	0.67	2.67	2.98	1.38	1.48	0.1	2.4	65	0	130	80	70	97	0	94	chest pain
4	2023-05-27T07:59:00.812260326Z	31.6	49.7	1.8	0.68	2.65	2.97	1.38	1.47	0.1	2.4	65	0	130	80	70	97	0	94	chest pain
4	2023-05-27T07:59:03.434582363Z	31.6	49.8	1.76	0.65	2.6	2.92	1.37	1.44	0.1	2.37	65	0	130	80	70	97	0	94	chest pain
4	2023-05-27T07:59:05.911420742Z	31.7	50	1.74	0.64	2.58	2.93	1.34	1.44	0.1	2.37	65	0	130	80	70	97	0	94	chest pain
4	2023-05-27T07:59:08.523965467Z	31.7	50.1	1.79	0.67	2.62	2.97	1.37	1.46	0.1	2.38	65	0	130	80	70	97	0	94	chest pain
4	2023-05-27T07:59:11.201964852Z	31.8	50.4	1.77	0.66	2.6	2.97	1.35	1.45	0.1	2.38	65	0	130	80	70	97	0	94	chest pain
4	2023-05-27T07:59:14.095482321Z	31.8	50.5	1.8	0.67	2.62	2.98	1.37	1.47	0.1	2.41	65	0	130	80	70	97	0	94	chest pain
4	2023-05-27T07:59:16.537775312Z	31.8	50.6	1.8	0.68	2.61	2.96	1.38	1.48	0.1	2.42	65	0	130	80	70	97	0	94	chest pain
4	2023-05-27T07:59:19.187876185Z	31.9	50.8	1.78	0.66	2.56	2.95	1.36	1.44	0.1	2.38	65	0	130	80	70	97	0	94	chest pain
4	2023-05-27T07:59:21.84033814Z	31.9	51	1.77	0.66	2.57	2.96	1.34	1.45	0.1	2.38	65	0	130	80	70	97	0	94	chest pain
4	2023-05-27T07:59:24.322113368Z	32	51.2	1.74	0.64	2.52	2.92	1.34	1.42	0.1	2.38	65	0	130	80	70	97	0	94	chest pain
4	2023-05-27T07:59:27.406504206Z	32	51.3	1.79	0.66	2.57	2.98	1.36	1.46	0.1	2.42	65	0	130	80	70	97	0	94	chest pain
4	2023-05-27T07:59:29.845478151Z	32	51.3	1.77	0.66	2.52	2.93	1.34	1.45	0.1	2.39	65	0	130	80	70	97	0	94	chest pain
4	2023-05-27T07:59:32.498795425Z	32.1	51.6	1.76	0.65	2.51	2.91	1.35	1.44	0.1	2.39	65	0	130	80	70	97	0	94	chest pain
4	2023-05-27T07:59:35.396884984Z	32.1	51.7	1.76	0.65	2.49	2.93	1.34	1.44	0.1	2.38	65	0	130	80	70	97	0	94	chest pain
4	2023-05-27T07:59:38.422852655Z	32.2	51.8	1.76	0.64	2.47	2.93	1.33	1.43	0.1	2.39	65	0	130	80	70	97	0	94	chest pain
4	2023-05-27T07:59:41.168367856Z	32.2	52	1.75	0.64	2.46	2.92	1.32	1.43	0.1	2.38	65	0	130	80	70	97	0	94	chest pain
4	2023-05-27T07:59:43.994735319Z	32.2	52.1	1.79	0.65	2.51	2.98	1.35	1.47	0.1	2.43	65	0	130	80	70	97	0	94	chest pain
4	2023-05-27T07:59:47.316072539Z	32.2	52.2	1.75	0.64	2.44	2.92	1.33	1.44	0.1	2.39	65	0	130	80	70	97	0	94	chest pain
4	2023-05-27T07:59:49.957728006Z	32.3	52.4	1.75	0.63	2.42	2.92	1.31	1.42	0.1	2.34	65	0	130	80	70	97	0	94	chest pain
4	2023-05-27T07:59:52.557579656Z	32.3	50.8	1.76	0.64	2.34	2.89	1.26	1.42	0.1	2.24	65	0	130	80	70	97	0	94	chest pain
4	2023-05-27T07:59:55.262726676Z	32.3	47.3	1.68	0.65	2.16	2.78	1.22	1.4	0.1	2.2	65	0	130	80	70	97	0	94	chest pain
4	2023-05-27T07:59:57.924957754Z	32.3	44.8	1.62	0.65	1.94	2.69	1.18	1.36	0.1	2.18	65	0	130	80	70	97	0	94	chest pain
4	2023-05-27T08:00:00.536593311Z	32.3	42.7	1.58	0.65	1.73	2.57	1.15	1.32	0.1	2.13	65	0	130	80	70	97	0	94	chest pain
4	2023-05-27T08:00:03.009404793Z	32.3	40.7	1.5	0.64	1.25	2.26	1.05	1.26	0.1	1.92	65	0	130	80	70	97	0	94	chest pain
4	2023-05-27T08:00:05.675217698Z	32.1	38	1.44	0.64	0.97	2.14	1.02	1.2	0.1	1.98	65	0	130	80	70	97	0	94	chest pain
4	2023-05-27T08:00:08.335526146Z	32	36.8	1.42	0.64	0.89	2.11	1.02	1.19	0.1	2.04	65	0	130	80	70	97	0	94	chest pain
4	2023-05-27T08:00:11.889142463Z	32	36.2	1.39	0.63	0.83	2.05	1	1.15	0.1	2.05	65	0	130	80	70	97	0	94	chest pain
4	2023-05-27T08:00:14.491647862Z	32	35.9	1.38	0.63	0.8	2	0.97	1.13	0.1	2	65	0	130	80	70	97	0	94	chest pain
4	2023-05-27T08:00:16.995069947Z	31.8	35.2	1.4	0.66	0.78	1.99	0.91	1.14	0.1	1.8	65	0	130	80	70	97	0	94	chest pain
4	2023-05-27T08:00:19.413644702Z	31.7	35	1.37	0.64	0.74	1.9	0.89	1.13	0.1	1.88	65	0	130	80	70	97	0	94	chest pain
4	2023-05-27T08:00:22.148537835Z	31.6	34.9	1.35	0.64	0.71	1.87	0.89	1.11	0.1	1.83	65	0	130	80	70	97	0	94	chest pain
4	2023-05-27T08:00:24.719933966Z	31.3	34.5	1.34	0.63	0.68	1.82	0.88	1.09	0.1	1.81	65	0	130	80	70	97	0	94	chest pain
4	2023-05-27T08:00:27.260996494Z	30.8	34.2	1.3	0.61	0.65	1.77	0.85	1.07	0.1	1.84	65	0	130	80	70	97	0	94	chest pain
4	2023-05-27T08:00:29.857936184Z	30.4	34.1	1.32	0.62	0.66	1.77	0.88	1.1	0.1	2.03	65	0	130	80	70	97	0	94	chest pain
4	2023-05-27T08:00:32.505860176Z	30.3	34.2	1.29	0.61	0.64	1.74	0.9	1.09	0.1	2.17	65	0	130	80	70	97	0	94	chest pain
4	2023-05-27T08:00:35.216000933Z	30.4	34.5	1.3	0.61	0.64	1.74	0.91	1.08	0.1	2.16	65	0	130	80	70	97	0	94	chest pain
4	2023-05-27T08:00:38.115776247Z	30.5	34.8	1.3	0.6	0.64	1.74	0.91	1.07	0.1	2.16	65	0	130	80	70	97	0	94	chest pain
4	2023-05-27T08:00:40.929693209Z	30.5	35.1	1.29	0.59	0.63	1.71	0.9	1.05	0.1	2.11	65	0	130	80	70	97	0	94	chest pain
4	2023-05-27T08:00:44.395808293Z	30.6	35.4	1.22	0.54	0.57	1.63	0.84	0.98	0.1	2	65	0	130	80	70	97	0	94	chest pain
4	2023-05-27T08:00:46.849743848Z	30.6	35.4	1.22	0.55	0.56	1.61	0.84	0.99	0.1	2.02	65	0	130	80	70	97	0	94	chest pain
4	2023-05-27T08:00:49.728531154Z	30.5	35.5	1.28	0.58	0.59	1.63	0.86	1.05	0.1	2.06	65	0	130	80	70	97	0	94	chest pain
4	2023-05-27T08:00:52.415999639Z	30.5	35.6	1.26	0.57	0.57	1.61	0.85	1.03	0.1	2.03	65	0	130	80	70	97	0	94	chest pain
4	2023-05-27T08:00:55.263373838Z	30.5	35.8	1.26	0.57	0.57	1.6	0.84	1.03	0.1	2.01	65	0	130	80	70	97	0	94	chest pain
4	2023-05-27T08:00:58.10924527Z	30.5	35.9	1.25	0.56	0.56	1.59	0.83	1.02	0.1	2.01	65	0	130	80	70	97	0	94	chest pain
4	2023-05-27T08:01:00.792650199Z	30.5	36.3	1.26	0.57	0.56	1.57	0.83	1.02	0.1	2	65	0	130	80	70	97	0	94	chest pain
4	2023-05-27T08:01:04.090899513Z	30.5	36.4	1.26	0.57	0.56	1.55	0.83	1.02	0.1	1.99	65	0	130	80	70	97	0	94	chest pain
4	2023-05-27T08:01:06.695302907Z	30.4	36.4	1.24	0.56	0.55	1.53	0.81	1.01	0.1	1.98	65	0	130	80	70	97	0	94	chest pain
4	2023-05-27T08:01:09.171580424Z	30.4	36.5	1.22	0.55	0.53	1.51	0.8	1	0.1	1.95	65	0	130	80	70	97	0	94	chest pain
4	2023-05-27T08:01:12.079820311Z	30.4	36.4	1.21	0.54	0.52	1.5	0.78	0.98	0.1	1.93	65	0	130	80	70	97	0	94	chest pain
4	2023-05-27T08:01:14.537666956Z	30.4	36.5	1.23	0.55	0.53	1.51	0.79	1	0.1	1.96	65	0	130	80	70	97	0	94	chest pain
4	2023-05-27T08:01:17.243613888Z	30.4	36.5	1.25	0.56	0.53	1.51	0.78	1.01	0.1	1.95	65	0	130	80	70	97	0	94	chest pain
4	2023-05-27T08:01:20.10133375Z	30.4	36.6	1.23	0.55	0.49	1.46	0.71	1	0.1	1.65	65	0	130	80	70	97	0	94	chest pain
4	2023-05-27T08:01:23.192091271Z	30.1	36.2	1.22	0.55	0.46	1.41	0.66	0.99	0.1	1.56	65	0	130	80	70	97	0	94	chest pain
4	2023-05-27T08:01:25.98805854Z	29.9	36	1.23	0.54	0.46	1.4	0.7	1	0.1	1.8	65	0	130	80	70	97	0	94	chest pain
4	2023-05-27T08:01:29.337512943Z	30	36.1	1.41	0.64	0.55	1.49	0.81	1.18	0.1	2.09	65	0	130	80	70	97	0	94	chest pain
4	2023-05-27T08:01:32.534453174Z	30	36.1	1.41	0.64	0.56	1.43	0.81	1.15	0.1	1.92	65	0	130	80	70	97	0	94	chest pain
4	2023-05-27T08:01:35.047064839Z	29.8	35.9	1.37	0.62	0.56	1.42	0.83	1.13	0.1	2.06	65	0	130	80	70	97	0	94	chest pain
4	2023-05-27T08:01:37.898385366Z	29.7	36.1	1.34	0.61	0.55	1.39	0.82	1.09	0.1	2.01	65	0	130	80	70	97	0	94	chest pain
4	2023-05-27T08:01:41.331395855Z	29.7	36	1.31	0.6	0.54	1.37	0.82	1.09	0.1	2.08	65	0	130	80	70	97	0	94	chest pain
4	2023-05-27T08:01:44.0899995Z	29.6	36.2	1.32	0.59	0.55	1.38	0.84	1.09	0.1	2.14	65	0	130	80	70	97	0	94	chest pain
4	2023-05-27T08:01:46.913771707Z	29.6	36.4	1.31	0.59	0.55	1.36	0.85	1.08	0.1	2.13	65	0	130	80	70	97	0	94	chest pain
4	2023-05-27T08:01:49.54361865Z	29.6	36.5	1.29	0.58	0.54	1.34	0.85	1.07	0.1	2.11	65	0	130	80	70	97	0	94	chest pain
4	2023-05-27T08:01:53.097384185Z	29.6	36.7	1.3	0.58	0.55	1.34	0.84	1.06	0.1	2.1	65	0	130	80	70	97	0	94	chest pain
5	2023-05-27T08:01:58.810885413Z	29.6	36.8	1.33	0.6	0.56	1.36	0.86	1.1	0.11	2.14	45	0	110	70	56	99	0	90
5	2023-05-27T08:02:01.195494031Z	29.5	36.8	1.37	0.64	0.61	1.35	0.88	1.13	0.1	2.12	45	0	110	70	56	99	0	90
5	2023-05-27T08:02:04.124277951Z	29.6	37.1	1.35	0.64	0.62	1.34	0.88	1.12	0.11	2.13	45	0	110	70	56	99	0	90
5	2023-05-27T08:02:07.380943652Z	29.6	37.4	1.34	0.63	0.62	1.33	0.88	1.11	0.1	2.11	45	0	110	70	56	99	0	90
5	2023-05-27T08:02:10.084540782Z	29.6	37.7	1.33	0.63	0.63	1.32	0.86	1.09	0.1	2.08	45	0	110	70	56	99	0	90
5	2023-05-27T08:02:12.714793575Z	29.6	38.1	1.29	0.62	0.62	1.3	0.85	1.07	0.1	2.08	45	0	110	70	56	99	0	90
5	2023-05-27T08:02:15.160880471Z	29.7	38.4	1.27	0.61	0.62	1.3	0.83	1.05	0.1	2.05	45	0	110	70	56	99	0	90
5	2023-05-27T08:02:17.832345768Z	29.6	38.6	1.3	0.63	0.64	1.32	0.84	1.07	0.1	2.08	45	0	110	70	56	99	0	90
5	2023-05-27T08:02:20.573587337Z	29.7	38.9	1.32	0.64	0.66	1.33	0.85	1.09	0.1	2.1	45	0	110	70	56	99	0	90
5	2023-05-27T08:02:23.772840107Z	29.7	39.1	1.32	0.65	0.67	1.33	0.85	1.09	0.1	2.1	45	0	110	70	56	99	0	90
5	2023-05-27T08:02:26.4739625Z	29.7	39.3	1.27	0.62	0.67	1.34	0.83	1.04	0.1	2.04	45	0	110	70	56	99	0	90
5	2023-05-27T08:02:29.088475815Z	29.8	39.6	1.31	0.62	0.84	1.48	0.85	1.06	0.1	2.06	45	0	110	70	56	99	0	90
5	2023-05-27T08:02:31.992499761Z	29.9	40	1.41	0.63	1.18	1.77	0.89	1.13	0.1	2.12	45	0	110	70	56	99	0	90
5	2023-05-27T08:02:34.815959761Z	29.9	40.1	1.47	0.65	1.46	2.02	0.93	1.17	0.1	2.15	45	0	110	70	56	99	0	90
5	2023-05-27T08:02:37.482458874Z	30	40.3	1.5	0.65	1.75	2.2	0.97	1.2	0.1	2.17	45	0	110	70	56	99	0	90
5	2023-05-27T08:02:40.423145984Z	30	40.3	1.53	0.65	1.96	2.33	1	1.23	0.1	2.19	45	0	110	70	56	99	0	90
5	2023-05-27T08:02:43.260500437Z	30	40.3	1.56	0.65	2.2	2.43	1.04	1.26	0.1	2.21	45	0	110	70	56	99	0	90
5	2023-05-27T08:02:46.178310116Z	30.1	40.3	1.59	0.65	2.37	2.52	1.07	1.28	0.1	2.22	45	0	110	70	56	99	0	90
5	2023-05-27T08:02:48.987525869Z	30.1	40.3	1.61	0.66	2.49	2.58	1.1	1.29	0.1	2.22	45	0	110	70	56	99	0	90
5	2023-05-27T08:02:52.543180318Z	30.1	40.3	1.62	0.66	2.59	2.64	1.12	1.31	0.1	2.23	45	0	110	70	56	99	0	90
5	2023-05-27T08:02:55.220519561Z	30.1	40.2	1.63	0.66	2.67	2.69	1.14	1.32	0.1	2.23	45	0	110	70	56	99	0	90
5	2023-05-27T08:02:58.016904767Z	30.2	40.2	1.64	0.66	2.71	2.72	1.16	1.33	0.1	2.24	45	0	110	70	56	99	0	90
5	2023-05-27T08:03:00.892289834Z	30.3	40.2	1.65	0.66	2.75	2.75	1.17	1.33	0.1	2.24	45	0	110	70	56	99	0	90
5	2023-05-27T08:03:03.503612708Z	30.2	40.1	1.65	0.66	2.78	2.77	1.19	1.34	0.1	2.24	45	0	110	70	56	99	0	90
5	2023-05-27T08:03:06.0194511Z	30.3	40.1	1.66	0.65	2.79	2.79	1.2	1.34	0.1	2.24	45	0	110	70	56	99	0	90
5	2023-05-27T08:03:08.859711922Z	30.3	40.1	1.66	0.66	2.81	2.8	1.21	1.35	0.1	2.24	45	0	110	70	56	99	0	90
5	2023-05-27T08:03:11.507864808Z	30.3	40.1	1.67	0.66	2.82	2.83	1.22	1.35	0.11	2.25	45	0	110	70	56	99	0	90
5	2023-05-27T08:03:14.136122238Z	30.4	40.2	1.67	0.66	2.83	2.84	1.23	1.34	0.11	2.25	45	0	110	70	56	99	0	90
5	2023-05-27T08:03:17.006086169Z	30.4	40.3	1.68	0.66	2.83	2.85	1.23	1.34	0.11	2.26	45	0	110	70	56	99	0	90
5	2023-05-27T08:03:19.629862588Z	30.4	40.5	1.68	0.66	2.82	2.86	1.24	1.32	0.11	2.25	45	0	110	70	56	99	0	90
5	2023-05-27T08:03:22.283675499Z	30.5	40.5	1.68	0.66	2.82	2.87	1.24	1.33	0.11	2.26	45	0	110	70	56	99	0	90
5	2023-05-27T08:03:24.96147043Z	30.6	40.8	1.69	0.67	2.82	2.88	1.25	1.34	0.11	2.26	45	0	110	70	56	99	0	90
5	2023-05-27T08:03:27.661092033Z	30.6	41	1.69	0.67	2.81	2.88	1.25	1.34	0.11	2.27	45	0	110	70	56	99	0	90
5	2023-05-27T08:03:30.314726334Z	30.6	41.2	1.69	0.66	2.79	2.88	1.25	1.32	0.11	2.26	45	0	110	70	56	99	0	90
5	2023-05-27T08:03:32.97745666Z	30.7	41.4	1.69	0.67	2.77	2.88	1.26	1.31	0.11	2.25	45	0	110	70	56	99	0	90
5	2023-05-27T08:03:35.649912245Z	30.7	41.5	1.67	0.66	2.76	2.85	1.25	1.3	0.11	2.25	45	0	110	70	56	99	0	90
5	2023-05-27T08:03:38.272653639Z	30.8	41.7	1.69	0.66	2.75	2.88	1.26	1.3	0.11	2.26	45	0	110	70	56	99	0	90
5	2023-05-27T08:03:40.735885219Z	30.8	41.8	1.67	0.65	2.71	2.86	1.25	1.28	0.11	2.24	45	0	110	70	56	99	0	90
5	2023-05-27T08:03:43.692778232Z	30.9	42	1.69	0.66	2.73	2.9	1.26	1.3	0.11	2.27	45	0	110	70	56	99	0	90
5	2023-05-27T08:03:46.504346908Z	30.9	42.1	1.71	0.67	2.71	2.88	1.27	1.31	0.11	2.28	45	0	110	70	56	99	0	90
5	2023-05-27T08:03:49.465752404Z	30.9	42.3	1.71	0.68	2.7	2.89	1.28	1.31	0.11	2.28	45	0	110	70	56	99	0	90
5	2023-05-27T08:03:52.619622382Z	31.1	42.5	1.7	0.67	2.69	2.88	1.27	1.3	0.11	2.28	45	0	110	70	56	99	0	90
5	2023-05-27T08:03:55.490143716Z	31.1	42.6	1.7	0.67	2.67	2.88	1.28	1.3	0.11	2.28	45	0	110	70	56	99	0	90
5	2023-05-27T08:03:58.428909145Z	31.2	42.8	1.67	0.67	2.61	2.83	1.26	1.29	0.11	2.26	45	0	110	70	56	99	0	90
5	2023-05-27T08:04:01.052329028Z	31.2	42.9	1.69	0.67	2.64	2.87	1.27	1.31	0.11	2.29	45	0	110	70	56	99	0	90
5	2023-05-27T08:04:03.693392216Z	31.3	43.1	1.69	0.67	2.62	2.84	1.25	1.3	0.11	2.26	45	0	110	70	56	99	0	90
5	2023-05-27T08:04:06.130231843Z	31.3	43.3	1.63	0.64	2.55	2.82	1.23	1.26	0.11	2.23	45	0	110	70	56	99	0	90
5	2023-05-27T08:04:08.706233918Z	31.4	43.5	1.69	0.67	2.59	2.87	1.26	1.31	0.11	2.29	45	0	110	70	56	99	0	90
5	2023-05-27T08:04:11.295823564Z	31.4	43.6	1.66	0.65	2.55	2.83	1.25	1.28	0.11	2.26	45	0	110	70	56	99	0	90
5	2023-05-27T08:04:13.886225038Z	31.4	43.7	1.68	0.66	2.56	2.87	1.26	1.3	0.11	2.29	45	0	110	70	56	99	0	90
5	2023-05-27T08:04:16.403833549Z	31.5	43.8	1.65	0.65	2.51	2.83	1.24	1.27	0.11	2.29	45	0	110	70	56	99	0	90
5	2023-05-27T08:04:18.964192194Z	31.5	43.9	1.66	0.66	2.48	2.8	1.24	1.28	0.11	2.25	45	0	110	70	56	99	0	90
5	2023-05-27T08:04:21.579775444Z	31.6	44.1	1.7	0.68	2.52	2.85	1.27	1.32	0.11	2.31	45	0	110	70	56	99	0	90
5	2023-05-27T08:04:24.453056181Z	31.6	44.2	1.63	0.64	2.44	2.79	1.24	1.27	0.11	2.26	45	0	110	70	56	99	0	90
5	2023-05-27T08:04:27.419259278Z	31.7	44.3	1.7	0.68	2.5	2.85	1.27	1.34	0.11	2.31	45	0	110	70	56	99	0	90
5	2023-05-27T08:04:30.157039403Z	31.7	44.5	1.7	0.68	2.48	2.83	1.28	1.34	0.11	2.31	45	0	110	70	56	99	0	90
5	2023-05-27T08:04:32.618059468Z	31.8	44.7	1.7	0.68	2.43	2.81	1.26	1.33	0.1	2.29	45	0	110	70	56	99	0	90
5	2023-05-27T08:04:35.583948262Z	31.8	44	1.68	0.67	2.19	2.7	1.22	1.32	0.1	2.22	45	0	110	70	56	99	0	90
5	2023-05-27T08:04:38.169881601Z	31.8	41.8	1.57	0.65	1.9	2.63	1.15	1.25	0.1	2.12	45	0	110	70	56	99	0	90
5	2023-05-27T08:04:40.815325864Z	31.9	39.9	1.53	0.65	1.67	2.51	1.11	1.21	0.1	2.08	45	0	110	70	56	99	0	90
5	2023-05-27T08:04:43.441657042Z	31.9	38.6	1.49	0.65	1.47	2.43	1.08	1.19	0.1	2.06	45	0	110	70	56	99	0	90
5	2023-05-27T08:04:46.11064188Z	31.8	37.5	1.47	0.66	1.35	2.34	1.08	1.17	0.1	2.05	45	0	110	70	56	99	0	90
5	2023-05-27T08:04:49.109679053Z	31.8	36.9	1.48	0.67	1.22	2.32	1.05	1.17	0.1	2.07	45	0	110	70	56	99	0	90
5	2023-05-27T08:04:52.396264681Z	31.8	36.5	1.46	0.69	1.12	2.24	1.04	1.16	0.1	2.07	45	0	110	70	56	99	0	90
5	2023-05-27T08:04:55.451117612Z	31.8	36.1	1.42	0.68	0.98	2.08	0.99	1.11	0.1	1.93	45	0	110	70	56	99	0	90
5	2023-05-27T08:04:58.096229117Z	31.8	36	1.32	0.65	0.8	1.92	0.87	1.02	0.1	1.75	45	0	110	70	56	99	0	90
5	2023-05-27T08:05:00.963315884Z	31.1	35.4	1.38	0.68	0.8	1.95	0.9	1.12	0.1	1.95	45	0	110	70	56	99	0	90
5	2023-05-27T08:05:03.517561061Z	31.1	35.6	1.39	0.69	0.8	1.94	0.95	1.14	0.1	2.07	45	0	110	70	56	99	0	90
5	2023-05-27T08:05:06.303089216Z	31.2	35.8	1.38	0.68	0.79	1.93	0.96	1.13	0.1	2.1	45	0	110	70	56	99	0	90
5	2023-05-27T08:05:09.028185096Z	31.2	36	1.38	0.68	0.79	1.91	0.97	1.13	0.1	2.13	45	0	110	70	56	99	0	90
5	2023-05-27T08:05:11.809899208Z	31.2	36.7	1.37	0.68	0.79	1.88	0.98	1.12	0.1	2.13	45	0	110	70	56	99	0	90
5	2023-05-27T08:05:14.75413455Z	31.2	37.4	1.36	0.68	0.78	1.84	0.97	1.1	0.1	2.1	45	0	110	70	56	99	0	90
5	2023-05-27T08:05:17.862355263Z	31.2	36.9	1.34	0.68	0.77	1.78	0.96	1.1	0.1	2.09	45	0	110	70	56	99	0	90
5	2023-05-27T08:05:21.141960984Z	31.1	36.3	1.34	0.67	0.75	1.73	0.94	1.09	0.1	2.02	45	0	110	70	56	99	0	90
5	2023-05-27T08:05:24.239849276Z	31.1	35.8	1.31	0.67	0.68	1.64	0.9	1.08	0.1	1.93	45	0	110	70	56	99	0	90
5	2023-05-27T08:05:26.885033597Z	31	35.6	1.3	0.67	0.67	1.61	0.89	1.07	0.1	1.93	45	0	110	70	56	99	0	90
5	2023-05-27T08:05:30.364809246Z	30.9	35.4	1.28	0.66	0.64	1.57	0.81	1.04	0.1	1.69	45	0	110	70	56	99	0	90
5	2023-05-27T08:05:33.015945334Z	30.7	35.3	1.29	0.65	0.67	1.56	0.85	1.06	0.1	2	45	0	110	70	56	99	0	90
5	2023-05-27T08:05:35.743959698Z	30.7	35.3	1.29	0.65	0.67	1.56	0.86	1.06	0.1	2.08	45	0	110	70	56	99	0	90
5	2023-05-27T08:05:38.554539287Z	30.7	35.4	1.3	0.65	0.68	1.55	0.87	1.05	0.1	2.11	45	0	110	70	56	99	0	90
5	2023-05-27T08:05:41.656204517Z	30.7	35.6	1.3	0.64	0.68	1.54	0.87	1.05	0.1	2.11	45	0	110	70	56	99	0	90
5	2023-05-27T08:05:44.24835193Z	30.6	35.7	1.3	0.64	0.69	1.53	0.87	1.04	0.1	2.1	45	0	110	70	56	99	0	90
5	2023-05-27T08:05:46.945300808Z	30.6	35.9	1.29	0.64	0.69	1.52	0.87	1.04	0.1	2.09	45	0	110	70	56	99	0	90
5	2023-05-27T08:05:50.087246909Z	30.6	36.1	1.3	0.65	0.69	1.52	0.86	1.04	0.1	2.09	45	0	110	70	56	99	0	90
5	2023-05-27T08:05:53.096637996Z	30.6	36.2	1.29	0.64	0.69	1.5	0.85	1.03	0.1	2.07	45	0	110	70	56	99	0	90
5	2023-05-27T08:05:56.167636778Z	30.6	36.1	1.28	0.64	0.69	1.47	0.84	1.03	0.1	2.07	45	0	110	70	56	99	0	90
5	2023-05-27T08:05:59.003409576Z	30.6	36	1.29	0.65	0.69	1.46	0.84	1.03	0.1	2.06	45	0	110	70	56	99	0	90
5	2023-05-27T08:06:01.663581535Z	30.6	36	1.28	0.65	0.69	1.44	0.83	1.03	0.1	2.05	45	0	110	70	56	99	0	90
5	2023-05-27T08:06:04.354639225Z	30.6	36	1.27	0.65	0.69	1.42	0.83	1.03	0.1	2.04	45	0	110	70	56	99	0	90
5	2023-05-27T08:06:06.9586296Z	30.5	36	1.27	0.65	0.69	1.41	0.82	1.03	0.1	2.04	45	0	110	70	56	99	0	90
5	2023-05-27T08:06:09.624936324Z	30.5	36.2	1.27	0.66	0.69	1.4	0.82	1.03	0.1	2.05	45	0	110	70	56	99	0	90
5	2023-05-27T08:06:12.480935321Z	30.5	36.3	1.27	0.66	0.7	1.39	0.81	1.02	0.1	2.04	45	0	110	70	56	99	0	90
5	2023-05-27T08:06:15.410390878Z	30.5	36.3	1.27	0.66	0.7	1.38	0.81	1.03	0.1	2.03	45	0	110	70	56	99	0	90
5	2023-05-27T08:06:18.060666785Z	30.5	36.2	1.25	0.65	0.69	1.35	0.8	1.02	0.1	2.02	45	0	110	70	56	99	0	90
5	2023-05-27T08:06:20.579123722Z	30.5	36.1	1.24	0.65	0.68	1.33	0.79	1.01	0.1	2.01	45	0	110	70	56	99	0	90
5	2023-05-27T08:06:23.173536896Z	30.5	36.1	1.2	0.62	0.65	1.29	0.77	0.97	0.1	1.97	45	0	110	70	56	99	0	90
5	2023-05-27T08:06:25.819128048Z	30.5	36.1	1.17	0.6	0.62	1.27	0.74	0.94	0.1	1.94	45	0	110	70	56	99	0	90
6	2023-05-27T08:06:28.28794148Z	30.5	36.2	1.15	0.59	0.6	1.25	0.72	0.93	0.1	1.94	45	0	110	70	56	99	0	90
6	2023-05-27T08:06:31.41541479Z	30.5	36.4	1.15	0.59	0.6	1.24	0.71	0.94	0.1	1.94	45	0	110	70	56	99	0	90
6	2023-05-27T08:06:34.230512463Z	30.5	36.6	1.16	0.59	0.6	1.25	0.71	0.95	0.1	1.95	45	0	110	70	56	99	0	90
6	2023-05-27T08:06:37.160458893Z	30.5	36.9	1.19	0.61	0.62	1.26	0.72	0.97	0.1	1.98	45	0	110	70	56	99	0	90
6	2023-05-27T08:06:39.972658975Z	30.6	37.2	1.21	0.62	0.64	1.27	0.73	0.99	0.1	2	57	0	117	68	65	99	0	103
6	2023-05-27T08:06:42.642137045Z	30.6	37.5	1.23	0.63	0.65	1.28	0.74	1	0.1	2.01	57	0	117	68	65	99	0	103
6	2023-05-27T08:06:45.286990404Z	30.7	37.8	1.23	0.63	0.66	1.29	0.74	1.01	0.1	2.02	57	0	117	68	65	99	0	103
6	2023-05-27T08:06:48.007355335Z	30.7	38.1	1.23	0.63	0.67	1.29	0.75	1.01	0.1	2.03	57	0	117	68	65	99	0	103
6	2023-05-27T08:06:50.837781485Z	30.8	38.3	1.23	0.63	0.68	1.3	0.75	1.01	0.1	2.04	57	0	117	68	65	99	0	103
6	2023-05-27T08:06:53.701243266Z	30.8	38.5	1.23	0.63	0.69	1.3	0.75	1.01	0.1	2.04	57	0	117	68	65	99	0	103
6	2023-05-27T08:06:56.745706866Z	30.9	38.7	1.23	0.63	0.7	1.31	0.76	1.01	0.1	2.05	57	0	117	68	65	99	0	103
6	2023-05-27T08:06:59.398217048Z	30.9	39	1.24	0.64	0.71	1.32	0.76	1.02	0.1	2.05	57	0	117	68	65	99	0	103
6	2023-05-27T08:07:02.179068057Z	31	39.3	1.24	0.64	0.72	1.33	0.76	1.03	0.1	2.06	57	0	117	68	65	99	0	103
6	2023-05-27T08:07:05.127383054Z	31	39.6	1.25	0.64	0.74	1.35	0.77	1.03	0.1	2.07	57	0	117	68	65	99	0	103
6	2023-05-27T08:07:07.575259012Z	31.1	39.9	1.27	0.65	0.84	1.4	0.79	1.05	0.1	2.08	57	0	117	68	65	99	0	103
6	2023-05-27T08:07:10.250941214Z	31.1	40.1	1.33	0.65	1.25	1.65	0.83	1.09	0.1	2.1	57	0	117	68	65	99	0	103
6	2023-05-27T08:07:12.732707936Z	31.2	40.1	1.39	0.65	1.64	1.91	0.87	1.13	0.1	2.13	57	0	117	68	65	99	0	103
6	2023-05-27T08:07:15.390209063Z	31.2	40	1.43	0.65	1.89	2.08	0.91	1.16	0.1	2.15	57	0	117	68	65	99	0	103
6	2023-05-27T08:07:18.151215729Z	31.2	39.8	1.46	0.65	2.1	2.21	0.94	1.18	0.1	2.16	57	0	117	68	65	99	0	103
6	2023-05-27T08:07:20.682881813Z	31.2	39.5	1.49	0.65	2.27	2.33	0.97	1.21	0.1	2.18	57	0	117	68	65	99	0	103
6	2023-05-27T08:07:23.839011059Z	31.2	39.2	1.51	0.65	2.39	2.4	1	1.22	0.1	2.18	57	0	117	68	65	99	0	103
6	2023-05-27T08:07:26.448728592Z	31.2	38.9	1.52	0.65	2.5	2.48	1.03	1.24	0.1	2.19	57	0	117	68	65	99	0	103
6	2023-05-27T08:07:29.003783943Z	31.2	38.5	1.54	0.65	2.57	2.53	1.04	1.25	0.1	2.19	57	0	117	68	65	99	0	103
6	2023-05-27T08:07:32.386887355Z	31.2	38.3	1.55	0.65	2.61	2.58	1.06	1.26	0.1	2.19	57	0	117	68	65	99	0	103
6	2023-05-27T08:07:35.253879709Z	31.2	38.1	1.57	0.65	2.65	2.62	1.08	1.26	0.1	2.2	57	0	117	68	65	99	0	103
6	2023-05-27T08:07:38.124951856Z	31.2	38.1	1.58	0.65	2.67	2.65	1.09	1.26	0.1	2.21	57	0	117	68	65	99	0	103
6	2023-05-27T08:07:40.824205665Z	31.2	38.2	1.59	0.65	2.67	2.67	1.1	1.26	0.1	2.21	57	0	117	68	65	99	0	103
6	2023-05-27T08:07:43.427894731Z	31.2	38.4	1.58	0.65	2.66	2.68	1.11	1.25	0.1	2.21	57	0	117	68	65	99	0	103
6	2023-05-27T08:07:46.266217Z	31.2	38.6	1.59	0.65	2.65	2.7	1.12	1.26	0.1	2.21	57	0	117	68	65	99	0	103
6	2023-05-27T08:07:48.801466436Z	31.2	38.8	1.6	0.65	2.65	2.71	1.13	1.26	0.1	2.22	57	0	117	68	65	99	0	103
6	2023-05-27T08:07:51.645162128Z	31.3	39	1.61	0.65	2.65	2.73	1.14	1.27	0.1	2.23	57	0	117	68	65	99	0	103
6	2023-05-27T08:07:54.488230941Z	31.3	39.1	1.61	0.66	2.64	2.73	1.15	1.28	0.1	2.23	57	0	117	68	65	99	0	103
6	2023-05-27T08:07:57.188159136Z	31.3	39.4	1.61	0.66	2.63	2.74	1.16	1.27	0.1	2.23	57	0	117	68	65	99	0	103
6	2023-05-27T08:08:03.091534676Z	31.4	39.6	1.62	0.66	2.62	2.74	1.17	1.27	0.1	2.24	57	0	117	68	65	99	0	103
6	2023-05-27T08:08:05.946036518Z	31.4	39.8	1.61	0.66	2.59	2.73	1.17	1.25	0.1	2.23	57	0	117	68	65	99	0	103
6	2023-05-27T08:08:08.513830272Z	31.5	40.2	1.61	0.65	2.58	2.74	1.17	1.26	0.1	2.23	57	0	117	68	65	99	0	103
6	2023-05-27T08:08:11.462603355Z	31.6	40.4	1.61	0.65	2.56	2.74	1.17	1.26	0.1	2.23	57	0	117	68	65	99	0	103
6	2023-05-27T08:08:14.183821619Z	31.6	40.6	1.61	0.65	2.55	2.74	1.17	1.27	0.1	2.24	57	0	117	68	65	99	0	103
6	2023-05-27T08:08:17.390151091Z	31.7	40.9	1.61	0.65	2.52	2.73	1.17	1.27	0.1	2.23	57	0	117	68	65	99	0	103
6	2023-05-27T08:08:19.853429262Z	31.7	41.1	1.61	0.65	2.5	2.74	1.17	1.26	0.1	2.24	57	0	117	68	65	99	0	103
6	2023-05-27T08:08:22.299103238Z	31.8	41.2	1.61	0.65	2.49	2.74	1.17	1.26	0.1	2.24	57	0	117	68	65	99	0	103
6	2023-05-27T08:08:24.978157217Z	31.8	41.4	1.61	0.65	2.48	2.73	1.17	1.27	0.1	2.24	57	0	117	68	65	99	0	103
6	2023-05-27T08:08:27.639186769Z	31.8	41.5	1.6	0.64	2.45	2.73	1.17	1.26	0.1	2.23	57	0	117	68	65	99	0	103
6	2023-05-27T08:08:30.316730279Z	31.9	41.8	1.59	0.64	2.43	2.72	1.16	1.24	0.1	2.22	57	0	117	68	65	99	0	103
6	2023-05-27T08:08:32.754724791Z	31.9	41.8	1.58	0.63	2.4	2.72	1.15	1.23	0.1	2.22	57	0	117	68	65	99	0	103
6	2023-05-27T08:08:35.418219679Z	31.9	42	1.56	0.61	2.37	2.7	1.13	1.21	0.1	2.2	57	0	117	68	65	99	0	103
6	2023-05-27T08:08:38.336595256Z	32	42.1	1.59	0.63	2.38	2.73	1.14	1.24	0.1	2.23	57	0	117	68	65	99	0	103
6	2023-05-27T08:08:41.186968856Z	32	42.2	1.6	0.63	2.37	2.73	1.15	1.25	0.1	2.24	57	0	117	68	65	99	0	103
6	2023-05-27T08:08:44.281766472Z	32	42.4	1.63	0.65	2.37	2.74	1.17	1.27	0.1	2.26	57	0	117	68	65	99	0	103
6	2023-05-27T08:08:46.921556888Z	32.1	42.6	1.68	0.69	2.41	2.76	1.22	1.33	0.1	2.32	57	0	117	68	65	99	0	103
6	2023-05-27T08:08:49.804582396Z	32.2	42.9	1.67	0.68	2.38	2.74	1.21	1.3	0.1	2.3	57	0	117	68	65	99	0	103
6	2023-05-27T08:08:52.251413056Z	32.2	43	1.61	0.65	2.31	2.69	1.19	1.27	0.1	2.26	57	0	117	68	65	99	0	103
6	2023-05-27T08:08:54.761271283Z	32.2	43.1	1.58	0.63	2.28	2.69	1.17	1.25	0.1	2.24	57	0	117	68	65	99	0	103
6	2023-05-27T08:09:11.490576282Z	32.4	44.1	1.85	0.65	2.35	3.18	0.75	1.43	0.1	2.49	57	0	117	68	65	99	0	103
6	2023-05-27T08:09:14.165329298Z	32.5	42.9	1.94	0.76	2.26	2.89	1	1.52	0.1	2.52	57	0	117	68	65	99	0	103
6	2023-05-27T08:09:17.041527196Z	32.5	40.7	1.87	0.79	2.07	2.68	1.18	1.48	0.1	2.46	57	0	117	68	65	99	0	103
6	2023-05-27T08:09:19.91303477Z	32.5	39.1	1.77	0.79	1.85	2.52	1.26	1.41	0.1	2.39	57	0	117	68	65	99	0	103
6	2023-05-27T08:09:22.621037989Z	32.4	37.7	1.69	0.79	1.67	2.37	1.28	1.34	0.1	2.32	57	0	117	68	65	99	0	103
6	2023-05-27T08:09:25.613111036Z	32.4	36.7	1.63	0.78	1.51	2.26	1.27	1.28	0.1	2.28	57	0	117	68	65	99	0	103
6	2023-05-27T08:09:28.628257096Z	32.4	36.2	1.58	0.77	1.35	2.16	1.24	1.24	0.1	2.23	57	0	117	68	65	99	0	103
6	2023-05-27T08:09:31.354498861Z	32.4	35.7	1.53	0.77	1.24	2.06	1.2	1.2	0.1	2.2	57	0	117	68	65	99	0	103
6	2023-05-27T08:09:34.064964431Z	32.4	35.3	1.44	0.76	1.01	1.89	1.11	1.16	0.1	1.88	57	0	117	68	65	99	0	103
6	2023-05-27T08:09:37.08833726Z	32.2	35	1.38	0.76	0.82	1.78	0.98	1.12	0.1	1.68	57	0	117	68	65	99	0	103
6	2023-05-27T08:09:40.078774737Z	31.7	34.5	1.35	0.74	0.79	1.74	0.9	1.1	0.1	1.54	57	0	117	68	65	99	0	103
6	2023-05-27T08:09:43.352540101Z	31.3	34.5	1.31	0.73	0.67	1.7	0.89	1.11	0.1	1.69	57	0	117	68	65	99	0	103
6	2023-05-27T08:09:46.268854452Z	31.2	34.5	1.33	0.71	0.65	1.66	0.88	1.11	0.1	1.75	57	0	117	68	65	99	0	103
6	2023-05-27T08:09:49.758315333Z	31	34.6	1.34	0.69	0.64	1.64	0.88	1.1	0.1	1.81	57	0	117	68	65	99	0	103
6	2023-05-27T08:09:52.463911213Z	30.9	34.8	1.33	0.68	0.63	1.6	0.86	1.1	0.1	1.89	57	0	117	68	65	99	0	103
6	2023-05-27T08:09:55.167582395Z	30.7	34.8	1.33	0.66	0.6	1.58	0.82	1.08	0.1	1.73	57	0	117	68	65	99	0	103
7	2023-05-27T08:09:57.840628193Z	30.5	34.9	1.32	0.65	0.6	1.57	0.78	1.07	0.1	1.67	64	0	140	80	101	98	1	301	pain, eye irritation, kidney issue, uric acid is high
7	2023-05-27T08:10:00.882580511Z	30.3	35	1.37	0.64	0.7	1.58	0.88	1.12	0.1	2.26	64	0	140	80	101	98	1	301	pain, eye irritation, kidney issue, uric acid is high
7	2023-05-27T08:10:03.426579533Z	30.3	35.2	1.37	0.63	0.75	1.57	0.97	1.12	0.1	2.44	64	0	140	80	101	98	1	301	pain, eye irritation, kidney issue, uric acid is high
7	2023-05-27T08:10:05.999469175Z	30.3	35.5	1.36	0.63	0.76	1.55	1	1.11	0.1	2.43	64	0	140	80	101	98	1	301	pain, eye irritation, kidney issue, uric acid is high
7	2023-05-27T08:10:08.882874757Z	30.3	35.6	1.34	0.63	0.77	1.52	1.01	1.1	0.1	2.38	64	0	140	80	101	98	1	301	pain, eye irritation, kidney issue, uric acid is high
7	2023-05-27T08:10:11.605710599Z	30.3	35.9	1.34	0.63	0.79	1.51	1.02	1.09	0.1	2.33	64	0	140	80	101	98	1	301	pain, eye irritation, kidney issue, uric acid is high
7	2023-05-27T08:10:14.432275599Z	30.3	36.3	1.36	0.63	1.13	1.58	1.04	1.11	0.1	2.29	64	0	140	80	101	98	1	301	pain, eye irritation, kidney issue, uric acid is high
7	2023-05-27T08:10:17.343966515Z	30.3	36.6	1.4	0.63	1.45	1.7	1.05	1.13	0.1	2.28	64	0	140	80	101	98	1	301	pain, eye irritation, kidney issue, uric acid is high
7	2023-05-27T08:10:20.081034789Z	30.3	36.8	1.41	0.63	1.57	1.79	1.05	1.14	0.1	2.27	64	0	140	80	101	98	1	301	pain, eye irritation, kidney issue, uric acid is high
7	2023-05-27T08:10:23.218530343Z	30.2	37	1.42	0.63	1.68	1.87	1.05	1.14	0.1	2.26	64	0	140	80	101	98	1	301	pain, eye irritation, kidney issue, uric acid is high
7	2023-05-27T08:10:25.688689934Z	30.3	37.4	1.43	0.64	1.75	1.94	1.04	1.14	0.1	2.25	64	0	140	80	101	98	1	301	pain, eye irritation, kidney issue, uric acid is high
7	2023-05-27T08:10:28.155491836Z	30.3	37.7	1.43	0.64	1.78	1.98	1.04	1.14	0.1	2.24	64	0	140	80	101	98	1	301	pain, eye irritation, kidney issue, uric acid is high
7	2023-05-27T08:10:30.828210191Z	30.3	37.9	1.43	0.64	1.8	2.01	1.03	1.15	0.1	2.24	64	0	140	80	101	98	1	301	pain, eye irritation, kidney issue, uric acid is high
7	2023-05-27T08:10:33.41368795Z	30.3	38.2	1.43	0.65	1.82	2.04	1.03	1.15	0.1	2.23	64	0	140	80	101	98	1	301	pain, eye irritation, kidney issue, uric acid is high
7	2023-05-27T08:10:36.092606608Z	30.3	38.5	1.43	0.65	1.82	2.06	1.02	1.14	0.1	2.23	64	0	140	80	101	98	1	301	pain, eye irritation, kidney issue, uric acid is high
7	2023-05-27T08:10:38.572268668Z	30.3	38.7	1.43	0.66	1.82	2.07	1.02	1.14	0.1	2.23	64	0	140	80	101	98	1	301	pain, eye irritation, kidney issue, uric acid is high
7	2023-05-27T08:10:40.985781892Z	30.4	39	1.43	0.66	1.83	2.08	1.02	1.14	0.1	2.23	64	0	140	80	101	98	1	301	pain, eye irritation, kidney issue, uric acid is high
7	2023-05-27T08:10:43.421836421Z	30.4	39.2	1.43	0.66	1.83	2.09	1.01	1.14	0.1	2.23	64	0	140	80	101	98	1	301	pain, eye irritation, kidney issue, uric acid is high
7	2023-05-27T08:10:45.87630702Z	30.4	39.4	1.43	0.66	1.83	2.09	1.01	1.14	0.1	2.23	64	0	140	80	101	98	1	301	pain, eye irritation, kidney issue, uric acid is high
7	2023-05-27T08:10:48.365622365Z	30.4	39.7	1.43	0.67	1.82	2.09	1.01	1.14	0.1	2.23	64	0	140	80	101	98	1	301	pain, eye irritation, kidney issue, uric acid is high
7	2023-05-27T08:10:50.782232445Z	30.5	40	1.43	0.67	1.82	2.09	1	1.14	0.1	2.23	64	0	140	80	101	98	1	301	pain, eye irritation, kidney issue, uric acid is high
7	2023-05-27T08:10:53.296330943Z	30.5	40.2	1.43	0.67	1.82	2.09	1	1.14	0.1	2.23	64	0	140	80	101	98	1	301	pain, eye irritation, kidney issue, uric acid is high
7	2023-05-27T08:10:55.939111759Z	30.6	40.4	1.43	0.68	1.82	2.09	1	1.14	0.1	2.23	64	0	140	80	101	98	1	301	pain, eye irritation, kidney issue, uric acid is high
7	2023-05-27T08:10:58.761269286Z	30.6	40.6	1.42	0.68	1.81	2.09	0.99	1.14	0.1	2.24	64	0	140	80	101	98	1	301	pain, eye irritation, kidney issue, uric acid is high
7	2023-05-27T08:11:01.532574878Z	30.6	40.8	1.42	0.68	1.81	2.09	0.99	1.14	0.1	2.24	64	0	140	80	101	98	1	301	pain, eye irritation, kidney issue, uric acid is high
7	2023-05-27T08:11:04.161584668Z	30.7	41	1.42	0.69	1.8	2.09	0.99	1.13	0.1	2.24	64	0	140	80	101	98	1	301	pain, eye irritation, kidney issue, uric acid is high
7	2023-05-27T08:11:06.801459293Z	30.7	41.2	1.42	0.69	1.79	2.09	0.99	1.13	0.1	2.25	64	0	140	80	101	98	1	301	pain, eye irritation, kidney issue, uric acid is high
7	2023-05-27T08:11:09.450115015Z	30.8	41.4	1.42	0.69	1.79	2.09	0.99	1.13	0.1	2.25	64	0	140	80	101	98	1	301	pain, eye irritation, kidney issue, uric acid is high
7	2023-05-27T08:11:12.349566872Z	30.8	41.5	1.42	0.69	1.78	2.09	0.98	1.14	0.1	2.25	64	0	140	80	101	98	1	301	pain, eye irritation, kidney issue, uric acid is high
7	2023-05-27T08:11:14.950971058Z	30.8	41.8	1.42	0.7	1.78	2.09	0.98	1.13	0.1	2.25	64	0	140	80	101	98	1	301	pain, eye irritation, kidney issue, uric acid is high
7	2023-05-27T08:11:17.474611306Z	30.9	42	1.42	0.7	1.77	2.09	0.98	1.13	0.1	2.25	64	0	140	80	101	98	1	301	pain, eye irritation, kidney issue, uric acid is high
8	2023-05-29T09:31:05.515063886Z	33.4	38	1.28	0.7	0.86	1.17	0.74	1.04	0.1	1.86	65	1	196	100	82	99	1	117	pain, weakness
8	2023-05-29T09:31:08.247770648Z	33.3	37.1	1.28	0.69	0.82	1.17	0.72	1.06	0.1	1.73	65	1	196	100	82	99	1	117	pain, weakness
8	2023-05-29T09:31:11.04564893Z	33.2	36.8	1.28	0.68	0.8	1.17	0.71	1.06	0.1	1.8	65	1	196	100	82	99	1	117	pain, weakness
8	2023-05-29T09:31:15.142040369Z	33	36.7	1.28	0.67	0.77	1.16	0.73	1.06	0.1	1.9	65	1	196	100	82	99	1	117	pain, weakness
8	2023-05-29T09:31:18.549785117Z	32.8	36.8	1.28	0.65	0.79	1.15	0.85	1.09	0.1	2.3	65	1	196	100	82	99	1	117	pain, weakness
8	2023-05-29T09:31:22.111837188Z	32.9	36.8	1.28	0.64	0.8	1.13	0.9	1.09	0.1	2.35	65	1	196	100	82	99	1	117	pain, weakness
8	2023-05-29T09:31:25.397237638Z	32.8	36.4	1.27	0.63	0.79	1.1	0.92	1.08	0.1	2.32	65	1	196	100	82	99	1	117	pain, weakness
8	2023-05-29T09:31:29.066837698Z	32.8	36.4	1.26	0.63	0.79	1.08	0.92	1.07	0.1	2.27	65	1	196	100	82	99	1	117	pain, weakness
8	2023-05-29T09:31:31.974120301Z	32.8	36.3	1.26	0.63	0.78	1.07	0.91	1.06	0.1	2.21	65	1	196	100	82	99	1	117	pain, weakness
8	2023-05-29T09:31:35.631800604Z	32.8	36.2	1.25	0.63	0.77	1.06	0.91	1.05	0.1	2.2	65	1	196	100	82	99	1	117	pain, weakness
8	2023-05-29T09:31:39.043128719Z	32.8	36.2	1.24	0.62	0.77	1.05	0.89	1.04	0.1	2.16	65	1	196	100	82	99	1	117	pain, weakness
8	2023-05-29T09:31:41.894989898Z	32.8	36.4	1.24	0.62	0.76	1.05	0.88	1.03	0.1	2.14	65	1	196	100	82	99	1	117	pain, weakness
8	2023-05-29T09:31:45.881481234Z	32.7	36.7	1.24	0.62	0.76	1.05	0.88	1.03	0.1	2.14	65	1	196	100	82	99	1	117	pain, weakness
8	2023-05-29T09:31:48.931088783Z	32.7	37	1.25	0.63	0.77	1.06	0.87	1.04	0.1	2.12	65	1	196	100	82	99	1	117	pain, weakness
8	2023-05-29T09:31:52.033406087Z	32.8	37.2	1.25	0.63	0.77	1.05	0.87	1.04	0.1	2.11	65	1	196	100	82	99	1	117	pain, weakness
8	2023-05-29T09:31:56.096036886Z	32.7	37.3	1.25	0.63	0.77	1.05	0.86	1.04	0.1	2.1	65	1	196	100	82	99	1	117	pain, weakness
8	2023-05-29T09:31:59.464442221Z	32.8	37	1.25	0.64	0.77	1.05	0.86	1.04	0.1	2.09	65	1	196	100	82	99	1	117	pain, weakness
8	2023-05-29T09:32:02.280908029Z	32.7	36.9	1.25	0.64	0.77	1.04	0.86	1.04	0.1	2.09	65	1	196	100	82	99	1	117	pain, weakness
8	2023-05-29T09:32:04.921950515Z	32.7	37	1.24	0.64	0.78	1.04	0.85	1.04	0.1	2.09	65	1	196	100	82	99	1	117	pain, weakness
8	2023-05-29T09:32:08.22940741Z	32.7	36.9	1.24	0.64	0.78	1.04	0.85	1.04	0.1	2.08	65	1	196	100	82	99	1	117	pain, weakness
8	2023-05-29T09:32:11.494904559Z	32.7	36.8	1.24	0.64	0.78	1.04	0.85	1.03	0.1	2.08	65	1	196	100	82	99	1	117	pain, weakness
8	2023-05-29T09:32:14.5481072Z	32.7	36.7	1.24	0.65	0.77	1.04	0.85	1.03	0.1	2.07	65	1	196	100	82	99	1	117	pain, weakness
8	2023-05-29T09:32:17.621305947Z	32.8	36.6	1.24	0.65	0.78	1.03	0.84	1.03	0.1	2.07	65	1	196	100	82	99	1	117	pain, weakness
8	2023-05-29T09:32:20.894873866Z	32.7	36.4	1.24	0.65	0.78	1.04	0.84	1.03	0.1	2.07	65	1	196	100	82	99	1	117	pain, weakness
8	2023-05-29T09:32:26.012617052Z	32.8	36.5	1.24	0.65	0.78	1.04	0.84	1.03	0.1	2.06	65	1	196	100	82	99	1	117	pain, weakness
8	2023-05-29T09:32:29.103014606Z	32.8	36.6	1.23	0.66	0.78	1.04	0.84	1.02	0.1	2.06	65	1	196	100	82	99	1	117	pain, weakness
8	2023-05-29T09:32:32.355043212Z	32.8	36.4	1.23	0.66	0.78	1.03	0.84	1.02	0.1	2.06	65	1	196	100	82	99	1	117	pain, weakness
8	2023-05-29T09:32:36.246504035Z	32.8	36.4	1.23	0.66	0.78	1.03	0.83	1.02	0.1	2.05	65	1	196	100	82	99	1	117	pain, weakness
8	2023-05-29T09:32:40.483865558Z	32.8	36.4	1.23	0.66	0.79	1.03	0.83	1.02	0.1	2.05	65	1	196	100	82	99	1	117	pain, weakness
8	2023-05-29T09:32:44.445698807Z	32.8	36.3	1.23	0.66	0.79	1.04	0.83	1.02	0.1	2.06	65	1	196	100	82	99	1	117	pain, weakness
8	2023-05-29T09:32:47.748227307Z	32.8	36.3	1.23	0.66	0.79	1.04	0.83	1.02	0.1	2.06	65	1	196	100	82	99	1	117	pain, weakness
8	2023-05-29T09:32:51.811946615Z	32.8	36.5	1.23	0.66	0.79	1.04	0.83	1.02	0.1	2.06	65	1	196	100	82	99	1	117	pain, weakness
8	2023-05-29T09:32:55.485555404Z	32.8	36.7	1.22	0.67	0.8	1.04	0.83	1.02	0.1	2.05	65	1	196	100	82	99	1	117	pain, weakness
8	2023-05-29T09:32:58.778183413Z	32.8	36.4	1.22	0.67	0.8	1.05	0.83	1.02	0.1	2.05	65	1	196	100	82	99	1	117	pain, weakness
8	2023-05-29T09:33:01.640882927Z	32.8	36.3	1.22	0.67	0.8	1.05	0.83	1.02	0.1	2.05	65	1	196	100	82	99	1	117	pain, weakness
8	2023-05-29T09:33:05.719869286Z	32.8	36.3	1.22	0.67	0.8	1.05	0.82	1.01	0.1	2.05	65	1	196	100	82	99	1	117	pain, weakness
8	2023-05-29T09:33:08.921003673Z	32.8	36.2	1.22	0.67	0.8	1.05	0.82	1.01	0.1	2.05	65	1	196	100	82	99	1	117	pain, weakness
8	2023-05-29T09:33:12.168782879Z	32.8	36	1.22	0.67	0.8	1.05	0.82	1.01	0.1	2.05	65	1	196	100	82	99	1	117	pain, weakness
8	2023-05-29T09:33:14.997463335Z	32.8	36.2	1.21	0.67	0.8	1.05	0.82	1.01	0.1	2.04	65	1	196	100	82	99	1	117	pain, weakness
8	2023-05-29T09:33:17.83254614Z	32.8	36.1	1.21	0.67	0.8	1.06	0.82	1.01	0.1	2.05	65	1	196	100	82	99	1	117	pain, weakness
8	2023-05-29T09:33:21.117821621Z	32.8	36.3	1.22	0.67	0.8	1.06	0.82	1	0.1	2.05	65	1	196	100	82	99	1	117	pain, weakness
8	2023-05-29T09:33:24.181739474Z	32.8	36.3	1.22	0.67	0.8	1.07	0.82	1	0.1	2.04	65	1	196	100	82	99	1	117	pain, weakness
8	2023-05-29T09:33:28.264982132Z	32.8	36	1.21	0.67	0.8	1.06	0.82	1	0.1	2.04	65	1	196	100	82	99	1	117	pain, weakness
8	2023-05-29T09:33:32.170013069Z	32.8	36	1.21	0.67	0.8	1.06	0.82	1	0.1	2.04	65	1	196	100	82	99	1	117	pain, weakness
8	2023-05-29T09:33:35.226966615Z	32.8	36.1	1.21	0.68	0.8	1.06	0.82	1	0.1	2.04	65	1	196	100	82	99	1	117	pain, weakness
8	2023-05-29T09:33:39.179178565Z	32.8	36	1.21	0.68	0.8	1.06	0.82	1	0.1	2.04	65	1	196	100	82	99	1	117	pain, weakness
8	2023-05-29T09:33:43.005653062Z	32.8	36.1	1.21	0.68	0.8	1.06	0.82	1	0.1	2.04	65	1	196	100	82	99	1	117	pain, weakness
8	2023-05-29T09:33:46.074410645Z	32.8	35.9	1.21	0.68	0.8	1.06	0.82	1	0.1	2.05	65	1	196	100	82	99	1	117	pain, weakness
8	2023-05-29T09:33:49.155368003Z	32.8	36	1.21	0.68	0.81	1.06	0.81	1	0.1	2.04	65	1	196	100	82	99	1	117	pain, weakness
8	2023-05-29T09:33:52.429795832Z	32.8	36	1.21	0.68	0.81	1.06	0.81	1	0.1	2.04	65	1	196	100	82	99	1	117	pain, weakness
8	2023-05-29T09:33:55.718882092Z	32.8	36	1.21	0.68	0.81	1.07	0.81	1	0.1	2.04	65	1	196	100	82	99	1	117	pain, weakness
8	2023-05-29T09:33:59.595503686Z	32.8	36	1.21	0.68	0.81	1.06	0.81	1	0.1	2.04	65	1	196	100	82	99	1	117	pain, weakness
8	2023-05-29T09:34:02.671166425Z	32.8	35.9	1.21	0.68	0.81	1.06	0.81	1	0.1	2.04	65	1	196	100	82	99	1	117	pain, weakness
8	2023-05-29T09:34:05.971468127Z	32.8	35.9	1.21	0.68	0.81	1.06	0.81	1	0.1	2.03	65	1	196	100	82	99	1	117	pain, weakness
8	2023-05-29T09:34:09.23123602Z	32.8	35.8	1.2	0.68	0.8	1.06	0.81	1	0.1	2.03	65	1	196	100	82	99	1	117	pain, weakness
8	2023-05-29T09:34:12.111449453Z	32.8	35.8	1.2	0.68	0.8	1.06	0.81	0.99	0.1	2.04	65	1	196	100	82	99	1	117	pain, weakness
8	2023-05-29T09:34:16.203392159Z	32.8	35.8	1.2	0.68	0.8	1.05	0.81	0.99	0.1	2.04	65	1	196	100	82	99	1	117	pain, weakness
8	2023-05-29T09:34:19.265287556Z	32.8	36	1.2	0.68	0.8	1.05	0.81	0.99	0.1	2.19	65	1	196	100	82	99	1	117	pain, weakness
8	2023-05-29T09:34:23.160234182Z	32.8	36.6	1.21	0.68	0.81	1.07	0.82	1	0.1	2.26	65	1	196	100	82	99	1	117	pain, weakness
8	2023-05-29T09:34:27.061995479Z	32.8	37.7	1.22	0.68	0.81	1.07	0.82	1.01	0.1	2.23	65	1	196	100	82	99	1	117	pain, weakness
8	2023-05-29T09:34:30.325206638Z	32.8	39.4	1.23	0.68	0.82	1.09	0.83	1.01	0.1	2.19	65	1	196	100	82	99	1	117	pain, weakness
8	2023-05-29T09:34:33.388474846Z	32.8	38.7	1.23	0.68	0.82	1.09	0.83	1.02	0.1	2.16	65	1	196	100	82	99	1	117	pain, weakness
8	2023-05-29T09:34:36.670315028Z	32.8	38.3	1.24	0.68	0.82	1.1	0.83	1.02	0.1	2.14	65	1	196	100	82	99	1	117	pain, weakness
8	2023-05-29T09:34:39.945977368Z	32.8	37.6	1.24	0.68	0.82	1.1	0.83	1.02	0.1	2.13	65	1	196	100	82	99	1	117	pain, weakness
8	2023-05-29T09:34:43.03321793Z	32.7	37.2	1.23	0.68	0.82	1.09	0.83	1.02	0.1	2.12	65	1	196	100	82	99	1	117	pain, weakness
8	2023-05-29T09:34:46.308600124Z	32.8	37.3	1.23	0.68	0.82	1.09	0.83	1.01	0.1	2.12	65	1	196	100	82	99	1	117	pain, weakness
8	2023-05-29T09:34:49.420850659Z	32.8	37.6	1.23	0.68	0.82	1.09	0.83	1.01	0.1	2.12	65	1	196	100	82	99	1	117	pain, weakness
8	2023-05-29T09:34:52.656314295Z	32.8	37.9	1.23	0.68	0.82	1.09	0.83	1.01	0.1	2.13	65	1	196	100	82	99	1	117	pain, weakness
8	2023-05-29T09:34:56.525616516Z	32.8	38.4	1.23	0.68	0.83	1.1	0.83	1.02	0.1	2.13	65	1	196	100	82	99	1	117	pain, weakness
8	2023-05-29T09:34:59.602230816Z	32.8	38.9	1.24	0.68	0.84	1.11	0.84	1.02	0.1	2.14	65	1	196	100	82	99	1	117	pain, weakness
8	2023-05-29T09:35:03.803043567Z	32.9	39.5	1.24	0.68	0.85	1.12	0.84	1.03	0.1	2.14	65	1	196	100	82	99	1	117	pain, weakness
8	2023-05-29T09:35:07.401386139Z	32.9	40	1.25	0.68	0.86	1.13	0.85	1.03	0.1	2.15	65	1	196	100	82	99	1	117	pain, weakness
8	2023-05-29T09:35:10.664923598Z	33	40.7	1.25	0.68	0.86	1.15	0.85	1.03	0.1	2.15	65	1	196	100	82	99	1	117	pain, weakness
8	2023-05-29T09:35:14.36864753Z	33	41.2	1.26	0.68	0.87	1.16	0.85	1.04	0.1	2.16	65	1	196	100	82	99	1	117	pain, weakness
8	2023-05-29T09:35:18.237177196Z	33.1	41.7	1.26	0.68	0.88	1.17	0.86	1.04	0.1	2.17	65	1	196	100	82	99	1	117	pain, weakness
8	2023-05-29T09:35:21.302002717Z	33.1	42.2	1.27	0.68	0.89	1.18	0.86	1.05	0.1	2.18	65	1	196	100	82	99	1	117	pain, weakness
8	2023-05-29T09:35:25.42669672Z	33.1	42.7	1.27	0.68	0.89	1.19	0.86	1.05	0.1	2.18	65	1	196	100	82	99	1	117	pain, weakness
8	2023-05-29T09:35:28.49388357Z	33.1	43.1	1.27	0.68	0.9	1.21	0.87	1.06	0.1	2.19	65	1	196	100	82	99	1	117	pain, weakness
8	2023-05-29T09:35:32.965965074Z	33.2	43.6	1.28	0.68	0.9	1.22	0.87	1.06	0.1	2.19	65	1	196	100	82	99	1	117	pain, weakness
8	2023-05-29T09:35:36.063480402Z	33.2	44	1.28	0.68	0.91	1.23	0.87	1.07	0.1	2.2	65	1	196	100	82	99	1	117	pain, weakness
8	2023-05-29T09:35:39.351268029Z	33.3	44.6	1.29	0.68	0.92	1.24	0.88	1.07	0.1	2.21	65	1	196	100	82	99	1	117	pain, weakness
8	2023-05-29T09:35:42.509463406Z	33.3	44.9	1.29	0.68	0.92	1.25	0.88	1.07	0.1	2.21	65	1	196	100	82	99	1	117	pain, weakness
8	2023-05-29T09:35:46.507637476Z	33.3	45.3	1.3	0.68	0.93	1.26	0.88	1.08	0.1	2.22	65	1	196	100	82	99	1	117	pain, weakness
8	2023-05-29T09:35:50.18651072Z	33.4	45.8	1.3	0.69	0.94	1.27	0.89	1.09	0.1	2.23	65	1	196	100	82	99	1	117	pain, weakness
8	2023-05-29T09:35:53.479730107Z	33.4	46.2	1.31	0.69	0.94	1.28	0.89	1.09	0.1	2.24	65	1	196	100	82	99	1	117	pain, weakness
8	2023-05-29T09:35:57.368645199Z	33.4	46.6	1.31	0.69	0.95	1.29	0.89	1.09	0.1	2.24	65	1	196	100	82	99	1	117	pain, weakness
8	2023-05-29T09:36:01.27383779Z	33.5	47	1.32	0.69	0.95	1.3	0.9	1.1	0.1	2.25	65	1	196	100	82	99	1	117	pain, weakness
8	2023-05-29T09:36:04.327604468Z	33.5	47.5	1.32	0.69	0.96	1.31	0.9	1.1	0.1	2.25	65	1	196	100	82	99	1	117	pain, weakness
8	2023-05-29T09:36:07.286133581Z	33.6	47.9	1.3	0.68	0.94	1.32	0.9	1.1	0.1	2.26	65	1	196	100	82	99	1	117	pain, weakness
8	2023-05-29T09:36:09.749821752Z	33.6	48.1	1.32	0.68	0.96	1.32	0.9	1.1	0.1	2.25	65	1	196	100	82	99	1	117	pain, weakness
8	2023-05-29T09:36:13.335585127Z	33.6	48.3	1.33	0.68	0.96	1.33	0.9	1.11	0.1	2.26	65	1	196	100	82	99	1	117	pain, weakness
8	2023-05-29T09:36:16.64834255Z	33.7	48.7	1.34	0.68	0.97	1.34	0.91	1.12	0.1	2.27	65	1	196	100	82	99	1	117	pain, weakness
8	2023-05-29T09:36:20.96429464Z	33.7	48.9	1.34	0.69	0.98	1.34	0.91	1.12	0.1	2.28	65	1	196	100	82	99	1	117	pain, weakness
8	2023-05-29T09:36:24.827955344Z	33.7	49.3	1.35	0.69	0.99	1.36	0.92	1.13	0.1	2.28	65	1	196	100	82	99	1	117	pain, weakness
8	2023-05-29T09:36:28.110428442Z	33.7	49.6	1.36	0.69	0.99	1.36	0.95	1.17	0.1	2.3	65	1	196	100	82	99	1	117	pain, weakness
8	2023-05-29T09:36:31.14944428Z	33.8	50.2	1.44	0.69	1.06	1.56	1.06	1.22	0.1	2.33	65	1	196	100	82	99	1	117	pain, weakness
8	2023-05-29T09:36:35.037007799Z	33.8	50.6	1.52	0.69	1.26	1.9	1.15	1.28	0.1	2.37	65	1	196	100	82	99	1	117	pain, weakness
8	2023-05-29T09:36:38.320438986Z	33.8	51	1.61	0.69	1.65	2.24	1.23	1.33	0.1	2.41	65	1	196	100	82	99	1	117	pain, weakness
8	2023-05-29T09:36:41.38017041Z	33.9	51.9	1.66	0.69	1.9	2.46	1.29	1.37	0.1	2.46	65	1	196	100	82	99	1	117	pain, weakness
8	2023-05-29T09:36:44.268379439Z	33.9	52.5	1.71	0.69	2.07	2.59	1.33	1.41	0.1	2.45	65	1	196	100	82	99	1	117	pain, weakness
8	2023-05-29T09:36:47.119975073Z	33.9	52.9	1.74	0.69	2.18	2.64	1.34	1.43	0.1	2.46	65	1	196	100	82	99	1	117	pain, weakness
8	2023-05-29T09:36:50.204431573Z	33.9	53.3	1.76	0.69	2.26	2.68	1.34	1.44	0.1	2.47	65	1	196	100	82	99	1	117	pain, weakness
8	2023-05-29T09:36:54.204353567Z	33.9	53.8	1.76	0.69	2.29	2.71	1.35	1.45	0.1	2.49	65	1	196	100	82	99	1	117	pain, weakness
8	2023-05-29T09:36:58.08138306Z	33.9	54.3	1.76	0.7	2.29	2.74	1.37	1.46	0.1	2.49	65	1	196	100	82	99	1	117	pain, weakness
8	2023-05-29T09:37:01.262308472Z	33.9	54.6	1.75	0.69	2.28	2.74	1.38	1.46	0.1	2.49	65	1	196	100	82	99	1	117	pain, weakness
8	2023-05-29T09:37:04.348682768Z	34	55	1.75	0.69	2.28	2.75	1.38	1.46	0.1	2.5	65	1	196	100	82	99	1	117	pain, weakness
8	2023-05-29T09:37:07.822005655Z	34	55.2	1.75	0.69	2.27	2.75	1.39	1.46	0.1	2.5	65	1	196	100	82	99	1	117	pain, weakness
8	2023-05-29T09:37:11.51235096Z	34	55.4	1.75	0.69	2.26	2.76	1.4	1.46	0.1	2.5	65	1	196	100	82	99	1	117	pain, weakness
8	2023-05-29T09:37:14.84002679Z	34	55.7	1.76	0.69	2.24	2.76	1.4	1.47	0.1	2.5	65	1	196	100	82	99	1	117	pain, weakness
8	2023-05-29T09:37:17.638761837Z	34	55.9	1.76	0.69	2.23	2.76	1.41	1.47	0.1	2.51	65	1	196	100	82	99	1	117	pain, weakness
8	2023-05-29T09:37:21.75697081Z	34	56.2	1.76	0.69	2.22	2.76	1.41	1.47	0.1	2.51	65	1	196	100	82	99	1	117	pain, weakness
8	2023-05-29T09:37:24.835120915Z	34.1	56.4	1.76	0.69	2.21	2.76	1.42	1.47	0.1	2.51	65	1	196	100	82	99	1	117	pain, weakness
8	2023-05-29T09:37:28.919244591Z	34.1	56.7	1.76	0.69	2.2	2.76	1.42	1.47	0.1	2.51	65	1	196	100	82	99	1	117	pain, weakness
8	2023-05-29T09:37:32.601890791Z	34.1	56.9	1.76	0.69	2.18	2.76	1.42	1.47	0.1	2.51	65	1	196	100	82	99	1	117	pain, weakness
8	2023-05-29T09:37:36.900940261Z	34.1	57.2	1.76	0.69	2.17	2.75	1.43	1.48	0.1	2.52	65	1	196	100	82	99	1	117	pain, weakness
8	2023-05-29T09:37:39.807761584Z	34.2	57.5	1.76	0.69	2.16	2.75	1.43	1.48	0.1	2.52	65	1	196	100	82	99	1	117	pain, weakness
8	2023-05-29T09:37:43.064743017Z	34.2	57.7	1.76	0.69	2.15	2.75	1.43	1.48	0.1	2.52	65	1	196	100	82	99	1	117	pain, weakness
8	2023-05-29T09:37:45.946851012Z	34.2	57.9	1.76	0.69	2.14	2.75	1.43	1.48	0.1	2.52	65	1	196	100	82	99	1	117	pain, weakness
8	2023-05-29T09:37:50.09162898Z	34.3	58.1	1.76	0.69	2.13	2.74	1.43	1.48	0.1	2.52	65	1	196	100	82	99	1	117	pain, weakness
8	2023-05-29T09:37:53.08019021Z	34.3	58.4	1.77	0.7	2.12	2.74	1.44	1.48	0.1	2.52	65	1	196	100	82	99	1	117	pain, weakness
8	2023-05-29T09:37:56.642777343Z	34.3	58.6	1.76	0.69	2.1	2.74	1.43	1.48	0.1	2.52	65	1	196	100	82	99	1	117	pain, weakness
8	2023-05-29T09:38:00.24900461Z	34.3	58.8	1.76	0.69	2.09	2.73	1.43	1.48	0.09	2.52	65	1	196	100	82	99	1	117	pain, weakness
8	2023-05-29T09:38:04.161912852Z	34.3	59	1.76	0.69	2.08	2.73	1.43	1.48	0.09	2.52	65	1	196	100	82	99	1	117	pain, weakness
8	2023-05-29T09:38:07.230390853Z	34.3	59.2	1.77	0.7	2.07	2.73	1.44	1.48	0.1	2.53	65	1	196	100	82	99	1	117	pain, weakness
8	2023-05-29T09:38:11.114088704Z	34.4	59.6	1.77	0.69	2.06	2.73	1.44	1.48	0.1	2.53	65	1	196	100	82	99	1	117	pain, weakness
8	2023-05-29T09:38:14.380691245Z	34.4	59.7	1.77	0.7	2.05	2.73	1.44	1.49	0.1	2.53	65	1	196	100	82	99	1	117	pain, weakness
8	2023-05-29T09:38:16.843972666Z	34.4	60	1.77	0.7	2.05	2.72	1.44	1.49	0.1	2.53	65	1	196	100	82	99	1	117	pain, weakness
8	2023-05-29T09:38:19.906054123Z	34.4	60.2	1.77	0.7	2.04	2.72	1.44	1.49	0.1	2.53	65	1	196	100	82	99	1	117	pain, weakness
8	2023-05-29T09:38:24.013937919Z	34.4	60.3	1.77	0.7	2.03	2.72	1.44	1.49	0.1	2.54	65	1	196	100	82	99	1	117	pain, weakness
8	2023-05-29T09:38:27.066873665Z	34.4	60.5	1.77	0.7	2.03	2.72	1.44	1.49	0.1	2.54	65	1	196	100	82	99	1	117	pain, weakness
8	2023-05-29T09:38:30.998909171Z	34.4	60.8	1.77	0.7	2.02	2.71	1.44	1.49	0.1	2.54	65	1	196	100	82	99	1	117	pain, weakness
8	2023-05-29T09:38:34.032312762Z	34.5	61	1.77	0.7	2.01	2.71	1.44	1.49	0.1	2.54	65	1	196	100	82	99	1	117	pain, weakness
8	2023-05-29T09:38:36.903345647Z	34.4	61.2	1.78	0.7	2	2.7	1.44	1.49	0.1	2.54	65	1	196	100	82	99	1	117	pain, weakness
8	2023-05-29T09:38:40.658390936Z	34.4	61.4	1.77	0.7	2	2.7	1.44	1.49	0.1	2.54	65	1	196	100	82	99	1	117	pain, weakness
8	2023-05-29T09:38:43.659234325Z	34.4	61.5	1.78	0.7	1.99	2.7	1.44	1.49	0.1	2.54	65	1	196	100	82	99	1	117	pain, weakness
8	2023-05-29T09:38:47.550836107Z	34.5	61.8	1.78	0.7	1.98	2.7	1.44	1.49	0.1	2.54	65	1	196	100	82	99	1	117	pain, weakness
8	2023-05-29T09:38:50.818308528Z	34.5	62	1.78	0.7	1.97	2.69	1.44	1.49	0.1	2.54	65	1	196	100	82	99	1	117	pain, weakness
8	2023-05-29T09:38:53.920148987Z	34.5	62.2	1.77	0.69	1.95	2.68	1.44	1.48	0.1	2.54	65	1	196	100	82	99	1	117	pain, weakness
8	2023-05-29T09:38:57.183181749Z	34.5	62.4	1.77	0.7	1.95	2.68	1.44	1.49	0.1	2.54	65	1	196	100	82	99	1	117	pain, weakness
8	2023-05-29T09:39:00.268604081Z	34.5	62.6	1.77	0.7	1.95	2.68	1.43	1.49	0.1	2.54	65	1	196	100	82	99	1	117	pain, weakness
8	2023-05-29T09:39:03.955274459Z	34.6	62.9	1.77	0.69	1.91	2.67	1.42	1.48	0.1	2.49	65	1	196	100	82	99	1	117	pain, weakness
8	2023-05-29T09:39:07.6258678Z	34.5	60.8	1.75	0.7	1.83	2.61	1.38	1.46	0.1	2.37	65	1	196	100	82	99	1	117	pain, weakness
8	2023-05-29T09:39:11.318128796Z	34.5	52.3	1.72	0.7	1.7	2.44	1.31	1.4	0.1	2.28	65	1	196	100	82	99	1	117	pain, weakness
8	2023-05-29T09:39:15.302797877Z	34.5	46.8	1.64	0.7	1.56	2.24	1.23	1.34	0.1	2.21	65	1	196	100	82	99	1	117	pain, weakness
8	2023-05-29T09:39:18.278036431Z	34.5	42.4	1.53	0.71	1.35	2.05	1.17	1.27	0.1	2.16	65	1	196	100	82	99	1	117	pain, weakness
8	2023-05-29T09:39:21.455729197Z	34.4	39.6	1.48	0.71	1.23	1.93	1.14	1.22	0.1	2.14	65	1	196	100	82	99	1	117	pain, weakness
8	2023-05-29T09:39:25.229456371Z	34.4	38.6	1.44	0.71	1.12	1.83	1.1	1.19	0.1	2.12	65	1	196	100	82	99	1	117	pain, weakness
8	2023-05-29T09:39:29.117618437Z	34.4	37.7	1.41	0.71	1.04	1.74	1.07	1.16	0.1	2.1	65	1	196	100	82	99	1	117	pain, weakness
8	2023-05-29T09:39:32.19141944Z	34.4	37.2	1.39	0.71	0.99	1.67	1.05	1.14	0.1	2.09	65	1	196	100	82	99	1	117	pain, weakness
8	2023-05-29T09:39:36.314994897Z	34.3	36.7	1.37	0.71	0.95	1.61	1.03	1.12	0.1	2.08	65	1	196	100	82	99	1	117	pain, weakness
8	2023-05-29T09:39:39.378727426Z	34.3	36.4	1.36	0.71	0.93	1.55	1.01	1.11	0.1	2.07	65	1	196	100	82	99	1	117	pain, weakness
8	2023-05-29T09:39:43.264631131Z	34.2	36	1.34	0.71	0.91	1.52	1	1.1	0.1	2.06	65	1	196	100	82	99	1	117	pain, weakness
8	2023-05-29T09:39:47.15235123Z	34.2	35.9	1.33	0.71	0.9	1.48	0.98	1.09	0.1	2.06	65	1	196	100	82	99	1	117	pain, weakness
8	2023-05-29T09:39:50.855754109Z	34.1	35.9	1.32	0.71	0.88	1.43	0.97	1.08	0.1	2.06	65	1	196	100	82	99	1	117	pain, weakness
8	2023-05-29T09:39:54.109217538Z	34.1	36.1	1.32	0.71	0.87	1.39	0.96	1.07	0.1	2.05	65	1	196	100	82	99	1	117	pain, weakness
8	2023-05-29T09:39:56.780669463Z	34.1	36	1.31	0.71	0.86	1.37	0.95	1.07	0.1	2.05	65	1	196	100	82	99	1	117	pain, weakness
8	2023-05-29T09:39:59.636861316Z	34.1	36	1.31	0.71	0.86	1.35	0.95	1.06	0.1	2.06	65	1	196	100	82	99	1	117	pain, weakness
8	2023-05-29T09:40:03.660668206Z	34	36.1	1.3	0.7	0.86	1.36	0.94	1.07	0.1	2	65	1	196	100	82	99	1	117	pain, weakness
8	2023-05-29T09:40:08.264601789Z	34	36.1	1.29	0.7	0.78	1.33	0.9	1.06	0.1	1.86	65	1	196	100	82	99	1	117	pain, weakness
8	2023-05-29T09:40:11.321780234Z	33.7	35.7	1.29	0.68	0.76	1.3	0.87	1.05	0.1	1.76	65	1	196	100	82	99	1	117	pain, weakness
8	2023-05-29T09:40:15.218581182Z	33.4	35.3	1.28	0.66	0.74	1.27	0.83	1.04	0.1	1.66	65	1	196	100	82	99	1	117	pain, weakness
8	2023-05-29T09:40:18.484625406Z	33	35.2	1.27	0.65	0.72	1.26	0.8	1.05	0.1	1.68	65	1	196	100	82	99	1	117	pain, weakness
8	2023-05-29T09:40:22.385839725Z	32.7	35.2	1.28	0.63	0.72	1.26	0.85	1.06	0.1	1.96	65	1	196	100	82	99	1	117	pain, weakness
8	2023-05-29T09:40:27.510737379Z	32.6	35.6	1.29	0.62	0.74	1.25	0.89	1.06	0.1	2.12	65	1	196	100	82	99	1	117	pain, weakness
9	2023-05-29T09:40:30.57196554Z	32.6	35.8	1.26	0.61	0.67	1.25	0.86	1.06	0.1	1.81	85	1	109	57	99	99	1	160	Pain
9	2023-05-29T09:40:33.849512119Z	32.3	36.2	1.29	0.6	0.72	1.25	0.9	1.07	0.1	2.15	85	1	109	57	99	99	1	160	Pain
9	2023-05-29T09:40:36.912829338Z	32.3	36.4	1.3	0.59	0.74	1.24	0.93	1.07	0.1	2.25	85	1	109	57	99	99	1	160	Pain
9	2023-05-29T09:40:39.990286696Z	32.4	36.6	1.31	0.59	0.75	1.22	0.94	1.07	0.1	2.24	85	1	109	57	99	99	1	160	Pain
9	2023-05-29T09:40:43.28310873Z	32.4	36.8	1.31	0.59	0.75	1.2	0.95	1.07	0.1	2.21	85	1	109	57	99	99	1	160	Pain
9	2023-05-29T09:40:47.186173587Z	32.4	37.2	1.3	0.59	0.75	1.19	0.94	1.07	0.1	2.19	85	1	109	57	99	99	1	160	Pain
9	2023-05-29T09:40:51.066687411Z	32.4	37.7	1.3	0.59	0.75	1.19	0.94	1.07	0.1	2.16	85	1	109	57	99	99	1	160	Pain
9	2023-05-29T09:40:54.338343751Z	32.4	38.4	1.3	0.6	0.76	1.19	0.93	1.07	0.1	2.15	85	1	109	57	99	99	1	160	Pain
9	2023-05-29T09:40:57.393291639Z	32.3	38.8	1.3	0.6	0.76	1.19	0.93	1.07	0.1	2.14	85	1	109	57	99	99	1	160	Pain
9	2023-05-29T09:41:01.339756517Z	32.4	39.3	1.3	0.6	0.77	1.19	0.92	1.07	0.1	2.14	85	1	109	57	99	99	1	160	Pain
9	2023-05-29T09:41:05.195849833Z	32.4	39.8	1.31	0.61	0.79	1.2	0.92	1.07	0.1	2.14	85	1	109	57	99	99	1	160	Pain
9	2023-05-29T09:41:08.467625985Z	32.4	40.3	1.31	0.61	0.79	1.21	0.92	1.06	0.1	2.13	85	1	109	57	99	99	1	160	Pain
9	2023-05-29T09:41:11.522191661Z	32.5	40.9	1.31	0.61	0.8	1.22	0.91	1.07	0.1	2.13	85	1	109	57	99	99	1	160	Pain
9	2023-05-29T09:41:14.789509177Z	32.4	41.2	1.31	0.62	0.82	1.23	0.91	1.08	0.1	2.14	85	1	109	57	99	99	1	160	Pain
9	2023-05-29T09:41:17.664293187Z	32.5	41.7	1.32	0.62	0.83	1.24	0.92	1.08	0.1	2.14	85	1	109	57	99	99	1	160	Pain
9	2023-05-29T09:41:20.97083406Z	32.5	42.1	1.32	0.63	0.84	1.25	0.91	1.08	0.1	2.15	85	1	109	57	99	99	1	160	Pain
9	2023-05-29T09:41:24.423758503Z	32.6	42.5	1.32	0.63	0.85	1.26	0.91	1.08	0.1	2.15	85	1	109	57	99	99	1	160	Pain
9	2023-05-29T09:41:28.149230923Z	32.6	42.9	1.32	0.63	0.86	1.27	0.91	1.09	0.1	2.16	85	1	109	57	99	99	1	160	Pain
9	2023-05-29T09:41:32.030790914Z	32.7	43.3	1.33	0.63	0.86	1.28	0.92	1.09	0.1	2.16	85	1	109	57	99	99	1	160	Pain
9	2023-05-29T09:41:35.911513506Z	32.7	43.8	1.33	0.64	0.9	1.29	0.92	1.1	0.1	2.17	85	1	109	57	99	99	1	160	Pain
9	2023-05-29T09:41:39.002728606Z	32.8	44.5	1.41	0.64	1.34	1.6	0.98	1.14	0.1	2.22	85	1	109	57	99	99	1	160	Pain
9	2023-05-29T09:41:42.898660958Z	32.8	46.3	1.5	0.64	1.78	2.03	1.05	1.21	0.1	2.29	85	1	109	57	99	99	1	160	Pain
9	2023-05-29T09:41:46.14595253Z	32.8	48.2	1.58	0.64	2.07	2.33	1.12	1.26	0.1	2.34	85	1	109	57	99	99	1	160	Pain
9	2023-05-29T09:41:48.61914753Z	32.9	49.7	1.63	0.64	2.18	2.5	1.17	1.31	0.1	2.36	85	1	109	57	99	99	1	160	Pain
9	2023-05-29T09:41:52.542943738Z	32.9	50.5	1.64	0.64	2.23	2.56	1.2	1.34	0.1	2.37	85	1	109	57	99	99	1	160	Pain
9	2023-05-29T09:41:55.781421934Z	32.9	50.9	1.67	0.65	2.28	2.63	1.24	1.37	0.1	2.39	85	1	109	57	99	99	1	160	Pain
9	2023-05-29T09:41:58.837778898Z	33	51.4	1.68	0.65	2.3	2.66	1.26	1.38	0.1	2.4	85	1	109	57	99	99	1	160	Pain
9	2023-05-29T09:42:02.120756009Z	33	51.8	1.69	0.65	2.3	2.69	1.27	1.39	0.1	2.4	85	1	109	57	99	99	1	160	Pain
9	2023-05-29T09:42:05.402752684Z	33	52	1.7	0.65	2.31	2.71	1.29	1.4	0.1	2.41	85	1	109	57	99	99	1	160	Pain
9	2023-05-29T09:42:08.265598705Z	33	52.3	1.7	0.66	2.31	2.72	1.31	1.4	0.1	2.42	85	1	109	57	99	99	1	160	Pain
9	2023-05-29T09:42:11.738472127Z	33.1	52.6	1.71	0.66	2.3	2.73	1.32	1.41	0.1	2.42	85	1	109	57	99	99	1	160	Pain
9	2023-05-29T09:42:14.827493071Z	33.1	52.9	1.71	0.66	2.3	2.73	1.33	1.41	0.1	2.42	85	1	109	57	99	99	1	160	Pain
9	2023-05-29T09:42:18.100599441Z	33.1	53.1	1.71	0.66	2.29	2.74	1.33	1.42	0.1	2.43	85	1	109	57	99	99	1	160	Pain
9	2023-05-29T09:42:21.148905433Z	33.2	53.5	1.71	0.66	2.28	2.74	1.34	1.42	0.1	2.43	85	1	109	57	99	99	1	160	Pain
9	2023-05-29T09:42:25.260200997Z	33.2	53.7	1.72	0.66	2.27	2.75	1.35	1.42	0.1	2.43	85	1	109	57	99	99	1	160	Pain
9	2023-05-29T09:42:28.95540304Z	33.2	53.9	1.72	0.67	2.26	2.75	1.36	1.42	0.1	2.44	85	1	109	57	99	99	1	160	Pain
9	2023-05-29T09:42:32.103560106Z	33.2	54.2	1.72	0.67	2.25	2.75	1.36	1.43	0.1	2.44	85	1	109	57	99	99	1	160	Pain
9	2023-05-29T09:42:36.111108602Z	33.3	54.5	1.72	0.67	2.25	2.75	1.37	1.43	0.1	2.44	85	1	109	57	99	99	1	160	Pain
9	2023-05-29T09:42:39.820775616Z	33.4	54.8	1.72	0.67	2.23	2.75	1.38	1.43	0.1	2.45	85	1	109	57	99	99	1	160	Pain
9	2023-05-29T09:42:43.074726477Z	33.4	55	1.73	0.67	2.22	2.75	1.38	1.43	0.1	2.45	85	1	109	57	99	99	1	160	Pain
9	2023-05-29T09:42:46.96322977Z	33.4	55.2	1.73	0.67	2.21	2.75	1.39	1.44	0.1	2.45	85	1	109	57	99	99	1	160	Pain
9	2023-05-29T09:42:50.086868348Z	33.5	55.5	1.73	0.67	2.2	2.74	1.39	1.44	0.1	2.45	85	1	109	57	99	99	1	160	Pain
9	2023-05-29T09:42:53.717654203Z	33.5	55.6	1.73	0.68	2.19	2.74	1.39	1.44	0.1	2.45	85	1	109	57	99	99	1	160	Pain
9	2023-05-29T09:42:58.073252402Z	33.5	55.8	1.73	0.68	2.18	2.74	1.4	1.44	0.1	2.46	85	1	109	57	99	99	1	160	Pain
9	2023-05-29T09:43:01.711956869Z	33.6	56.2	1.73	0.68	2.17	2.73	1.4	1.44	0.1	2.46	85	1	109	57	99	99	1	160	Pain
9	2023-05-29T09:43:04.414953433Z	33.6	56.4	1.73	0.68	2.16	2.73	1.4	1.44	0.1	2.46	85	1	109	57	99	99	1	160	Pain
9	2023-05-29T09:43:07.440938084Z	33.7	56.6	1.74	0.68	2.16	2.73	1.39	1.45	0.1	2.41	85	1	109	57	99	99	1	160	Pain
9	2023-05-29T09:43:11.380841156Z	33.7	55.4	1.72	0.69	2.05	2.67	1.36	1.44	0.1	2.37	85	1	109	57	99	99	1	160	Pain
9	2023-05-29T09:43:14.410398677Z	33.7	51	1.6	0.69	1.58	2.43	1.27	1.38	0.1	2.2	85	1	109	57	99	99	1	160	Pain
9	2023-05-29T09:43:17.888703697Z	33.7	44.9	1.49	0.69	1.07	2.09	1.13	1.29	0.1	2	85	1	109	57	99	99	1	160	Pain
9	2023-05-29T09:43:21.372815884Z	33.7	41.2	1.43	0.68	0.92	1.91	1.05	1.22	0.1	2.01	85	1	109	57	99	99	1	160	Pain
9	2023-05-29T09:43:25.264160261Z	33.5	38.6	1.41	0.67	0.9	1.83	1.09	1.19	0.1	2.15	85	1	109	57	99	99	1	160	Pain
9	2023-05-29T09:43:29.149723559Z	33.5	37.9	1.39	0.66	0.88	1.77	1.09	1.16	0.1	2.17	85	1	109	57	99	99	1	160	Pain
9	2023-05-29T09:43:32.435204787Z	33.4	37.4	1.36	0.66	0.86	1.71	1.08	1.14	0.1	2.16	85	1	109	57	99	99	1	160	Pain
9	2023-05-29T09:43:36.110432272Z	33.4	37.4	1.35	0.66	0.85	1.66	1.06	1.13	0.1	2.14	85	1	109	57	99	99	1	160	Pain
9	2023-05-29T09:43:39.401869324Z	33.4	37.1	1.34	0.66	0.84	1.62	1.04	1.11	0.1	2.12	85	1	109	57	99	99	1	160	Pain
9	2023-05-29T09:43:42.701176442Z	33.3	36.8	1.33	0.66	0.83	1.57	1.03	1.1	0.1	2.1	85	1	109	57	99	99	1	160	Pain
9	2023-05-29T09:43:46.558972983Z	33.3	36.6	1.32	0.66	0.82	1.52	1.01	1.09	0.1	2.09	85	1	109	57	99	99	1	160	Pain
9	2023-05-29T09:43:50.263176754Z	33.3	36.5	1.31	0.66	0.82	1.48	0.99	1.08	0.1	2.08	85	1	109	57	99	99	1	160	Pain
9	2023-05-29T09:43:54.185586515Z	33.2	36.4	1.3	0.66	0.81	1.44	0.98	1.08	0.1	2.07	85	1	109	57	99	99	1	160	Pain
9	2023-05-29T09:43:57.427818071Z	33.2	36.4	1.3	0.66	0.81	1.41	0.97	1.07	0.1	2.06	85	1	109	57	99	99	1	160	Pain
9	2023-05-29T09:44:01.456743253Z	33.2	36.2	1.29	0.66	0.81	1.38	0.95	1.06	0.1	2.06	85	1	109	57	99	99	1	160	Pain
9	2023-05-29T09:44:04.789472829Z	33.2	36.4	1.29	0.67	0.8	1.35	0.94	1.06	0.1	2.05	85	1	109	57	99	99	1	160	Pain
9	2023-05-29T09:44:08.287027144Z	33.2	36.4	1.28	0.67	0.8	1.33	0.93	1.05	0.1	2.05	85	1	109	57	99	99	1	160	Pain
9	2023-05-29T09:44:11.144892472Z	33.1	36.4	1.28	0.67	0.79	1.31	0.91	1.05	0.1	2.02	85	1	109	57	99	99	1	160	Pain
10	2023-05-29T09:44:14.504096892Z	33.1	36.3	1.27	0.67	0.76	1.31	0.89	1.05	0.1	1.96	80	1	110	70	70	95	1	274	Breath problem, pain
10	2023-05-29T09:44:18.527627977Z	33.1	36.5	1.28	0.66	0.8	1.3	0.9	1.06	0.1	2.03	80	1	110	70	70	95	1	274	Breath problem, pain
10	2023-05-29T09:44:21.60825935Z	33.1	36.6	1.28	0.66	0.81	1.28	0.91	1.06	0.1	2.05	80	1	110	70	70	95	1	274	Breath problem, pain
10	2023-05-29T09:44:24.757330558Z	33.1	36.6	1.28	0.66	0.8	1.26	0.9	1.05	0.1	2.05	80	1	110	70	70	95	1	274	Breath problem, pain
10	2023-05-29T09:44:28.165457611Z	33	36.4	1.27	0.66	0.78	1.24	0.88	1.05	0.1	2.01	80	1	110	70	70	95	1	274	Breath problem, pain
10	2023-05-29T09:44:32.642497045Z	33	36.2	1.27	0.65	0.79	1.23	0.89	1.05	0.1	2.04	80	1	110	70	70	95	1	274	Breath problem, pain
10	2023-05-29T09:44:35.519676424Z	32.9	36.1	1.26	0.65	0.78	1.21	0.89	1.04	0.1	2.05	80	1	110	70	70	95	1	274	Breath problem, pain
10	2023-05-29T09:44:38.996661629Z	32.9	36.4	1.26	0.65	0.78	1.21	0.89	1.04	0.1	2.05	80	1	110	70	70	95	1	274	Breath problem, pain
10	2023-05-29T09:44:42.067803349Z	32.9	36.8	1.26	0.65	0.78	1.2	0.89	1.04	0.1	2.06	80	1	110	70	70	95	1	274	Breath problem, pain
10	2023-05-29T09:44:45.558761515Z	32.8	37.2	1.26	0.65	0.79	1.2	0.89	1.04	0.1	2.07	80	1	110	70	70	95	1	274	Breath problem, pain
10	2023-05-29T09:44:48.619211295Z	32.8	37.6	1.27	0.65	0.8	1.21	0.89	1.04	0.1	2.08	80	1	110	70	70	95	1	274	Breath problem, pain
10	2023-05-29T09:44:51.705839247Z	32.9	38.2	1.27	0.66	0.84	1.24	0.91	1.05	0.1	2.09	80	1	110	70	70	95	1	274	Breath problem, pain
10	2023-05-29T09:44:54.563702017Z	32.9	39.1	1.31	0.66	1	1.38	0.93	1.08	0.1	2.1	80	1	110	70	70	95	1	274	Breath problem, pain
10	2023-05-29T09:44:57.43000978Z	32.9	39.8	1.36	0.66	1.14	1.51	0.98	1.11	0.1	2.12	80	1	110	70	70	95	1	274	Breath problem, pain
10	2023-05-29T09:45:00.596216426Z	32.9	40.5	1.42	0.66	1.33	1.72	1.01	1.16	0.1	2.14	80	1	110	70	70	95	1	274	Breath problem, pain
10	2023-05-29T09:45:04.001342482Z	32.9	41	1.46	0.66	1.54	1.89	1.03	1.18	0.1	2.16	80	1	110	70	70	95	1	274	Breath problem, pain
10	2023-05-29T09:45:06.677028255Z	33	41.6	1.48	0.66	1.61	1.98	1.03	1.19	0.1	2.17	80	1	110	70	70	95	1	274	Breath problem, pain
10	2023-05-29T09:45:10.345365381Z	33	42.1	1.48	0.66	1.6	2.04	1.03	1.19	0.1	2.18	80	1	110	70	70	95	1	274	Breath problem, pain
10	2023-05-29T09:45:14.220223313Z	33	42.5	1.47	0.67	1.6	2.07	1.04	1.2	0.1	2.19	80	1	110	70	70	95	1	274	Breath problem, pain
10	2023-05-29T09:45:17.302135802Z	33.1	43.2	1.47	0.67	1.58	2.08	1.05	1.19	0.1	2.21	80	1	110	70	70	95	1	274	Breath problem, pain
10	2023-05-29T09:45:20.352620041Z	33.1	43.6	1.47	0.67	1.57	2.09	1.05	1.2	0.1	2.21	80	1	110	70	70	95	1	274	Breath problem, pain
10	2023-05-29T09:45:23.645822186Z	33.1	44.1	1.47	0.67	1.56	2.1	1.06	1.2	0.1	2.22	80	1	110	70	70	95	1	274	Breath problem, pain
10	2023-05-29T09:45:26.720218536Z	33.1	44.5	1.47	0.67	1.55	2.1	1.06	1.2	0.1	2.23	80	1	110	70	70	95	1	274	Breath problem, pain
10	2023-05-29T09:45:30.015871635Z	33.2	44.9	1.47	0.68	1.55	2.11	1.07	1.2	0.1	2.23	80	1	110	70	70	95	1	274	Breath problem, pain
10	2023-05-29T09:45:33.874824008Z	33.2	45.3	1.45	0.68	1.54	2.11	1.07	1.2	0.1	2.24	80	1	110	70	70	95	1	274	Breath problem, pain
10	2023-05-29T09:45:37.802231909Z	33.2	45.7	1.47	0.68	1.53	2.11	1.08	1.21	0.1	2.25	80	1	110	70	70	95	1	274	Breath problem, pain
10	2023-05-29T09:45:41.061449414Z	33.3	46.2	1.47	0.68	1.53	2.11	1.08	1.21	0.1	2.26	80	1	110	70	70	95	1	274	Breath problem, pain
10	2023-05-29T09:45:44.170512194Z	33.3	46.5	1.47	0.68	1.52	2.11	1.08	1.21	0.1	2.26	80	1	110	70	70	95	1	274	Breath problem, pain
10	2023-05-29T09:45:47.205821258Z	33.3	46.9	1.47	0.68	1.52	2.11	1.09	1.21	0.1	2.27	80	1	110	70	70	95	1	274	Breath problem, pain
10	2023-05-29T09:45:50.087714583Z	33.3	47.2	1.47	0.68	1.52	2.11	1.09	1.22	0.1	2.27	80	1	110	70	70	95	1	274	Breath problem, pain
10	2023-05-29T09:45:53.555263046Z	33.4	47.6	1.48	0.68	1.52	2.11	1.09	1.22	0.1	2.28	80	1	110	70	70	95	1	274	Breath problem, pain
10	2023-05-29T09:45:56.216409119Z	33.4	47.9	1.48	0.69	1.51	2.12	1.1	1.22	0.1	2.28	80	1	110	70	70	95	1	274	Breath problem, pain
10	2023-05-29T09:45:59.681610652Z	33.4	48.2	1.48	0.69	1.51	2.12	1.1	1.22	0.1	2.29	80	1	110	70	70	95	1	274	Breath problem, pain
10	2023-05-29T09:46:03.393875948Z	33.5	48.5	1.49	0.69	1.5	2.12	1.1	1.23	0.1	2.29	80	1	110	70	70	95	1	274	Breath problem, pain
10	2023-05-29T09:46:06.058018151Z	33.5	48.9	1.49	0.69	1.5	2.12	1.1	1.23	0.1	2.3	80	1	110	70	70	95	1	274	Breath problem, pain
10	2023-05-29T09:46:09.713054908Z	33.5	49.3	1.49	0.69	1.5	2.12	1.1	1.23	0.1	2.29	80	1	110	70	70	95	1	274	Breath problem, pain
10	2023-05-29T09:46:12.9907653Z	33.5	49.5	1.49	0.69	1.5	2.13	1.11	1.23	0.1	2.31	80	1	110	70	70	95	1	274	Breath problem, pain
10	2023-05-29T09:46:16.274845586Z	33.6	49.9	1.5	0.69	1.5	2.13	1.11	1.24	0.1	2.31	80	1	110	70	70	95	1	274	Breath problem, pain
10	2023-05-29T09:46:18.745836537Z	33.6	50.3	1.5	0.69	1.49	2.13	1.11	1.24	0.1	2.32	80	1	110	70	70	95	1	274	Breath problem, pain
10	2023-05-29T09:46:22.646171234Z	33.6	50.6	1.5	0.69	1.49	2.13	1.12	1.24	0.1	2.32	80	1	110	70	70	95	1	274	Breath problem, pain
10	2023-05-29T09:46:25.747286551Z	33.6	50.8	1.5	0.69	1.49	2.13	1.12	1.25	0.1	2.32	80	1	110	70	70	95	1	274	Breath problem, pain
10	2023-05-29T09:46:28.598180214Z	33.6	51.1	1.51	0.7	1.49	2.13	1.12	1.25	0.1	2.33	80	1	110	70	70	95	1	274	Breath problem, pain
10	2023-05-29T09:46:31.634903622Z	33.7	51.4	1.51	0.69	1.49	2.13	1.12	1.25	0.1	2.33	80	1	110	70	70	95	1	274	Breath problem, pain
10	2023-05-29T09:46:34.506803628Z	33.7	51.7	1.51	0.7	1.48	2.13	1.12	1.26	0.1	2.34	80	1	110	70	70	95	1	274	Breath problem, pain
10	2023-05-29T09:46:37.366035001Z	33.7	52	1.51	0.7	1.48	2.13	1.13	1.26	0.1	2.34	80	1	110	70	70	95	1	274	Breath problem, pain
10	2023-05-29T09:46:41.278963139Z	33.7	52.2	1.52	0.7	1.48	2.13	1.13	1.26	0.1	2.34	80	1	110	70	70	95	1	274	Breath problem, pain
10	2023-05-29T09:46:44.953888583Z	33.7	52.4	1.52	0.7	1.48	2.13	1.13	1.26	0.1	2.34	80	1	110	70	70	95	1	274	Breath problem, pain
10	2023-05-29T09:46:48.028657165Z	33.7	52.7	1.52	0.7	1.48	2.13	1.13	1.27	0.1	2.35	80	1	110	70	70	95	1	274	Breath problem, pain
10	2023-05-29T09:46:51.508406072Z	33.8	53.1	1.52	0.7	1.47	2.14	1.13	1.27	0.1	2.35	80	1	110	70	70	95	1	274	Breath problem, pain
10	2023-05-29T09:46:54.587180823Z	33.7	53.3	1.51	0.7	1.47	2.13	1.13	1.27	0.1	2.36	80	1	110	70	70	95	1	274	Breath problem, pain
10	2023-05-29T09:46:57.63947536Z	33.7	53.6	1.53	0.7	1.47	2.13	1.13	1.27	0.1	2.36	80	1	110	70	70	95	1	274	Breath problem, pain
10	2023-05-29T09:47:00.332698686Z	33.9	54	1.53	0.7	1.47	2.12	1.13	1.28	0.1	2.35	80	1	110	70	70	95	1	274	Breath problem, pain
10	2023-05-29T09:47:03.378093443Z	33.8	53.7	1.53	0.7	1.41	2.1	1.12	1.28	0.1	2.31	80	1	110	70	70	95	1	274	Breath problem, pain
10	2023-05-29T09:47:06.861562819Z	33.8	51.7	1.5	0.71	1.33	2.02	1.1	1.27	0.1	2.23	80	1	110	70	70	95	1	274	Breath problem, pain
10	2023-05-29T09:47:09.736965348Z	33.8	47.8	1.46	0.71	1.24	1.89	1.07	1.25	0.1	2.19	80	1	110	70	70	95	1	274	Breath problem, pain
10	2023-05-29T09:47:12.991325426Z	33.8	44.4	1.43	0.71	1.16	1.77	1.05	1.22	0.1	2.16	80	1	110	70	70	95	1	274	Breath problem, pain
10	2023-05-29T09:47:16.287061634Z	33.8	42.1	1.4	0.71	1.1	1.68	1.03	1.19	0.1	2.14	80	1	110	70	70	95	1	274	Breath problem, pain
10	2023-05-29T09:47:18.937492148Z	33.8	40.8	1.38	0.71	1.05	1.6	1.01	1.16	0.1	2.13	80	1	110	70	70	95	1	274	Breath problem, pain
10	2023-05-29T09:47:22.034329096Z	33.8	39.6	1.36	0.71	1.01	1.55	0.99	1.14	0.1	2.1	80	1	110	70	70	95	1	274	Breath problem, pain
10	2023-05-29T09:47:25.902115077Z	33.8	38.5	1.34	0.71	0.97	1.48	0.97	1.12	0.1	2.09	80	1	110	70	70	95	1	274	Breath problem, pain
10	2023-05-29T09:47:29.394737089Z	33.8	37.6	1.32	0.71	0.94	1.41	0.96	1.1	0.1	2.08	80	1	110	70	70	95	1	274	Breath problem, pain
10	2023-05-29T09:47:32.067761073Z	33.8	37.2	1.31	0.71	0.92	1.37	0.95	1.09	0.1	2.08	80	1	110	70	70	95	1	274	Breath problem, pain
10	2023-05-29T09:47:36.807978816Z	33.7	37.1	1.31	0.71	0.9	1.34	0.94	1.08	0.1	2.07	80	1	110	70	70	95	1	274	Breath problem, pain
10	2023-05-29T09:47:40.681127381Z	33.7	36.9	1.3	0.71	0.9	1.33	0.93	1.07	0.1	1.97	80	1	110	70	70	95	1	274	Breath problem, pain
10	2023-05-29T09:47:43.937183119Z	33.7	36.8	1.3	0.71	0.88	1.32	0.91	1.08	0.1	1.93	80	1	110	70	70	95	1	274	Breath problem, pain
10	2023-05-29T09:47:56.020928164Z	33.1	36.3	1.29	0.7	0.85	1.3	0.91	1.08	0.1	1.96	80	1	110	70	70	95	1	274	Breath problem, pain
10	2023-05-29T09:47:59.305814883Z	33	36.3	1.29	0.69	0.85	1.26	0.92	1.07	0.1	2.09	80	1	110	70	70	95	1	274	Breath problem, pain
10	2023-05-29T09:48:02.595609578Z	33.1	36.5	1.28	0.68	0.83	1.19	0.9	1.06	0.1	2.09	80	1	110	70	70	95	1	274	Breath problem, pain
10	2023-05-29T09:48:06.235296033Z	33.1	36.5	1.28	0.68	0.83	1.18	0.89	1.05	0.1	2.09	80	1	110	70	70	95	1	274	Breath problem, pain
11	2023-05-29T09:48:13.433656448Z	33.1	36.8	1.27	0.68	0.82	1.17	0.89	1.05	0.1	2.08	46	0	120	80	95	97	1	471	pain, weakness
11	2023-05-29T09:48:16.299351372Z	33.1	36.8	1.27	0.69	0.82	1.16	0.88	1.04	0.1	2.08	46	0	120	80	95	97	1	471	pain, weakness
11	2023-05-29T09:48:19.811092555Z	33.1	37.2	1.26	0.69	0.82	1.16	0.88	1.04	0.1	2.08	46	0	120	80	95	97	1	471	pain, weakness
11	2023-05-29T09:48:22.840006325Z	33.1	37.5	1.27	0.69	0.83	1.16	0.89	1.04	0.1	2.09	46	0	120	80	95	97	1	471	pain, weakness
11	2023-05-29T09:48:26.740859167Z	33.1	38	1.27	0.69	0.84	1.17	0.88	1.04	0.1	2.09	46	0	120	80	95	97	1	471	pain, weakness
11	2023-05-29T09:48:29.802375356Z	33.1	38.5	1.27	0.69	0.84	1.18	0.89	1.05	0.1	2.1	46	0	120	80	95	97	1	471	pain, weakness
11	2023-05-29T09:48:33.906338613Z	33.2	39.1	1.3	0.69	0.93	1.24	0.92	1.06	0.1	2.12	46	0	120	80	95	97	1	471	pain, weakness
11	2023-05-29T09:48:37.589439659Z	33.2	40	1.39	0.69	1.29	1.63	0.97	1.12	0.1	2.16	46	0	120	80	95	97	1	471	pain, weakness
11	2023-05-29T09:48:40.81092398Z	33.2	40.9	1.43	0.69	1.47	1.83	0.98	1.13	0.1	2.17	46	0	120	80	95	97	1	471	pain, weakness
11	2023-05-29T09:48:44.761910903Z	33.3	41.6	1.43	0.69	1.52	1.9	0.99	1.15	0.1	2.18	46	0	120	80	95	97	1	471	pain, weakness
11	2023-05-29T09:48:47.793060486Z	33.3	42.2	1.44	0.69	1.51	1.93	1	1.16	0.1	2.19	46	0	120	80	95	97	1	471	pain, weakness
11	2023-05-29T09:48:50.996194532Z	33.3	42.8	1.44	0.69	1.51	1.94	1.01	1.16	0.1	2.2	46	0	120	80	95	97	1	471	pain, weakness
11	2023-05-29T09:48:55.025189118Z	33.3	43.4	1.44	0.69	1.5	1.95	1.01	1.16	0.1	2.21	46	0	120	80	95	97	1	471	pain, weakness
11	2023-05-29T09:48:58.675960115Z	33.4	43.8	1.44	0.7	1.49	1.97	1.02	1.17	0.1	2.22	46	0	120	80	95	97	1	471	pain, weakness
11	2023-05-29T09:49:01.961250973Z	33.4	44.4	1.45	0.7	1.48	1.98	1.03	1.17	0.1	2.23	46	0	120	80	95	97	1	471	pain, weakness
11	2023-05-29T09:49:05.239627632Z	33.5	44.9	1.45	0.7	1.47	1.99	1.03	1.18	0.1	2.24	46	0	120	80	95	97	1	471	pain, weakness
11	2023-05-29T09:49:08.923627678Z	33.5	45.2	1.45	0.7	1.47	1.99	1.04	1.18	0.1	2.25	46	0	120	80	95	97	1	471	pain, weakness
11	2023-05-29T09:49:12.821155363Z	33.5	45.7	1.45	0.7	1.46	2	1.05	1.19	0.1	2.25	46	0	120	80	95	97	1	471	pain, weakness
11	2023-05-29T09:49:16.104957476Z	33.6	46.2	1.45	0.7	1.45	2	1.05	1.19	0.1	2.26	46	0	120	80	95	97	1	471	pain, weakness
11	2023-05-29T09:49:19.991591446Z	33.6	46.5	1.45	0.7	1.45	2.01	1.05	1.19	0.1	2.26	46	0	120	80	95	97	1	471	pain, weakness
11	2023-05-29T09:49:23.066540797Z	33.6	46.9	1.46	0.7	1.44	2.01	1.06	1.2	0.1	2.27	46	0	120	80	95	97	1	471	pain, weakness
11	2023-05-29T09:49:26.829268284Z	33.7	47.4	1.46	0.7	1.44	2.01	1.06	1.2	0.1	2.27	46	0	120	80	95	97	1	471	pain, weakness
11	2023-05-29T09:49:30.084347183Z	33.7	47.7	1.46	0.7	1.44	2.01	1.07	1.21	0.1	2.28	46	0	120	80	95	97	1	471	pain, weakness
11	2023-05-29T09:49:33.317585363Z	33.7	48.1	1.47	0.7	1.44	2.02	1.07	1.21	0.1	2.28	46	0	120	80	95	97	1	471	pain, weakness
11	2023-05-29T09:49:37.219572844Z	33.7	48.4	1.47	0.7	1.44	2.02	1.07	1.21	0.1	2.29	46	0	120	80	95	97	1	471	pain, weakness
11	2023-05-29T09:49:40.691152277Z	33.7	48.8	1.47	0.7	1.43	2.02	1.08	1.22	0.1	2.3	46	0	120	80	95	97	1	471	pain, weakness
11	2023-05-29T09:49:43.548376022Z	33.8	49.1	1.48	0.7	1.43	2.03	1.08	1.22	0.1	2.3	46	0	120	80	95	97	1	471	pain, weakness
11	2023-05-29T09:49:46.830462409Z	33.8	49.4	1.48	0.7	1.43	2.03	1.08	1.22	0.1	2.31	46	0	120	80	95	97	1	471	pain, weakness
11	2023-05-29T09:49:50.282609926Z	33.8	49.7	1.48	0.7	1.43	2.03	1.09	1.23	0.1	2.31	46	0	120	80	95	97	1	471	pain, weakness
11	2023-05-29T09:49:53.779785258Z	33.9	50.1	1.49	0.7	1.42	2.03	1.09	1.23	0.1	2.32	46	0	120	80	95	97	1	471	pain, weakness
11	2023-05-29T09:49:56.869112009Z	33.9	50.3	1.49	0.7	1.42	2.03	1.09	1.23	0.1	2.32	46	0	120	80	95	97	1	471	pain, weakness
11	2023-05-29T09:50:00.953374261Z	33.9	50.7	1.5	0.71	1.42	2.03	1.09	1.24	0.1	2.32	46	0	120	80	95	97	1	471	pain, weakness
11	2023-05-29T09:50:04.020431268Z	33.9	51	1.5	0.71	1.42	2.03	1.1	1.24	0.1	2.33	46	0	120	80	95	97	1	471	pain, weakness
11	2023-05-29T09:50:07.076985439Z	34	51.4	1.5	0.71	1.42	2.04	1.1	1.24	0.1	2.33	46	0	120	80	95	97	1	471	pain, weakness
11	2023-05-29T09:50:11.188940952Z	34	51.7	1.5	0.71	1.42	2.04	1.1	1.25	0.1	2.34	46	0	120	80	95	97	1	471	pain, weakness
11	2023-05-29T09:50:14.26646099Z	34	51.9	1.51	0.71	1.41	2.04	1.1	1.25	0.1	2.34	46	0	120	80	95	97	1	471	pain, weakness
11	2023-05-29T09:50:17.313035927Z	34	52.3	1.51	0.71	1.41	2.04	1.1	1.25	0.1	2.33	46	0	120	80	95	97	1	471	pain, weakness
11	2023-05-29T09:50:20.263476981Z	34	51.9	1.5	0.71	1.35	2	1.1	1.25	0.1	2.27	46	0	120	80	95	97	1	471	pain, weakness
11	2023-05-29T09:50:23.885921301Z	34	48.7	1.48	0.71	1.3	1.92	1.09	1.24	0.1	2.24	46	0	120	80	95	97	1	471	pain, weakness
11	2023-05-29T09:50:27.150547634Z	34	45.2	1.44	0.71	1.21	1.78	1.06	1.22	0.1	2.18	46	0	120	80	95	97	1	471	pain, weakness
11	2023-05-29T09:50:30.228872305Z	34	42	1.41	0.71	1.14	1.68	1.03	1.19	0.1	2.14	46	0	120	80	95	97	1	471	pain, weakness
11	2023-05-29T09:50:33.394887615Z	34	39.9	1.39	0.71	1.08	1.59	1.01	1.16	0.1	2.13	46	0	120	80	95	97	1	471	pain, weakness
11	2023-05-29T09:50:37.198048938Z	34	38.9	1.37	0.71	1.03	1.52	0.99	1.14	0.1	2.11	46	0	120	80	95	97	1	471	pain, weakness
11	2023-05-29T09:50:40.483688086Z	33.9	38	1.34	0.72	0.98	1.45	0.97	1.12	0.1	2.1	46	0	120	80	95	97	1	471	pain, weakness
11	2023-05-29T09:50:43.548645955Z	34	37.6	1.34	0.72	0.95	1.42	0.96	1.11	0.1	2.09	46	0	120	80	95	97	1	471	pain, weakness
11	2023-05-29T09:50:46.211891529Z	33.9	37.3	1.33	0.72	0.93	1.38	0.95	1.1	0.1	2.08	46	0	120	80	95	97	1	471	pain, weakness
11	2023-05-29T09:50:49.489078256Z	33.9	36.9	1.32	0.72	0.91	1.34	0.94	1.09	0.1	2.08	46	0	120	80	95	97	1	471	pain, weakness
11	2023-05-29T09:50:52.664328712Z	33.9	36.7	1.31	0.72	0.9	1.31	0.93	1.08	0.1	2.05	46	0	120	80	95	97	1	471	pain, weakness
11	2023-05-29T09:50:56.781016964Z	33.8	36.5	1.3	0.71	0.82	1.29	0.89	1.08	0.1	1.99	46	0	120	80	95	97	1	471	pain, weakness
11	2023-05-29T09:51:00.994306567Z	33.8	36.8	1.3	0.7	0.86	1.27	0.91	1.08	0.1	2.07	46	0	120	80	95	97	1	471	pain, weakness
11	2023-05-29T09:51:03.832494388Z	33.7	36.5	1.3	0.7	0.86	1.25	0.91	1.07	0.1	2.08	46	0	120	80	95	97	1	471	pain, weakness
11	2023-05-29T09:51:06.890403279Z	33.7	36.5	1.29	0.69	0.85	1.23	0.91	1.07	0.1	2.07	46	0	120	80	95	97	1	471	pain, weakness
11	2023-05-29T09:51:10.442543445Z	33.7	36.3	1.29	0.69	0.84	1.21	0.9	1.06	0.1	2.07	46	0	120	80	95	97	1	471	pain, weakness
11	2023-05-29T09:51:13.667778597Z	33.7	36.2	1.28	0.68	0.84	1.21	0.9	1.05	0.1	2.01	46	0	120	80	95	97	1	471	pain, weakness
11	2023-05-29T09:51:16.606195075Z	33.7	36.6	1.28	0.68	0.85	1.23	0.9	1.06	0.1	2.06	46	0	120	80	95	97	1	471	pain, weakness
11	2023-05-29T09:51:19.512940109Z	33.6	36.8	1.29	0.68	0.85	1.22	0.9	1.06	0.1	2.06	46	0	120	80	95	97	1	471	pain, weakness
11	2023-05-29T09:51:23.081859029Z	33.6	36.7	1.29	0.68	0.83	1.21	0.84	1.06	0.1	1.72	46	0	120	80	95	97	1	471	pain, weakness
11	2023-05-29T09:51:25.738881363Z	33.2	36.1	1.28	0.68	0.81	1.2	0.84	1.06	0.1	1.91	46	0	120	80	95	97	1	471	pain, weakness
11	2023-05-29T09:51:28.418030758Z	33	36.1	1.28	0.67	0.81	1.19	0.87	1.06	0.1	2.05	46	0	120	80	95	97	1	471	pain, weakness
11	2023-05-29T09:51:31.689139667Z	33.1	36.4	1.28	0.67	0.81	1.17	0.88	1.06	0.1	2.1	46	0	120	80	95	97	1	471	pain, weakness
11	2023-05-29T09:51:35.179519193Z	33	36.5	1.28	0.67	0.81	1.16	0.89	1.06	0.1	2.11	46	0	120	80	95	97	1	471	pain, weakness
11	2023-05-29T09:51:39.46788065Z	33	36.7	1.28	0.66	0.81	1.14	0.89	1.06	0.1	2.11	46	0	120	80	95	97	1	471	pain, weakness
11	2023-05-29T09:51:51.525151213Z	33.1	36.7	1.28	0.66	0.8	1.13	0.89	1.05	0.1	2.1	46	0	120	80	95	97	1	471	pain, weakness
11	2023-05-29T09:51:54.611814465Z	33.1	36.8	1.28	0.67	0.8	1.11	0.89	1.05	0.1	2.1	46	0	120	80	95	97	1	471	pain, weakness
11	2023-05-29T09:51:57.881705108Z	33	37.9	1.28	0.67	0.81	1.12	0.92	1.06	0.1	2.11	46	0	120	80	95	97	1	471	pain, weakness
12	2023-05-29T09:52:01.005975339Z	33	38.6	1.37	0.67	0.88	1.31	1.01	1.1	0.1	2.16	55	1	122	76	81	98	1	92	Weakness
12	2023-05-29T09:52:06.421120792Z	33.1	39.4	1.5	0.67	1.32	1.77	1.11	1.19	0.1	2.2	55	1	122	76	81	98	1	92	Weakness
12	2023-05-29T09:52:10.56949737Z	33.1	41	1.58	0.68	1.78	2.13	1.19	1.26	0.1	2.26	55	1	122	76	81	98	1	92	Weakness
12	2023-05-29T09:52:13.225242173Z	33.1	42.7	1.63	0.68	2.04	2.32	1.25	1.3	0.1	2.29	55	1	122	76	81	98	1	92	Weakness
12	2023-05-29T09:52:24.719494924Z	33.1	44	1.67	0.68	2.17	2.44	1.29	1.34	0.1	2.33	55	1	122	76	81	98	1	92	Weakness
12	2023-05-29T09:52:27.971913317Z	33.1	45	1.8	0.68	2.63	2.82	1.44	1.47	0.1	2.43	55	1	122	76	81	98	1	92	Weakness
12	2023-05-29T09:52:30.707494245Z	33.2	49.8	1.82	0.68	2.69	2.86	1.48	1.49	0.1	2.44	55	1	122	76	81	98	1	92	Weakness
12	2023-05-29T09:52:34.112387788Z	33.2	50.6	1.84	0.68	2.73	2.91	1.5	1.51	0.1	2.45	55	1	122	76	81	98	1	92	Weakness
12	2023-05-29T09:52:39.156828743Z	33.3	51.7	1.85	0.68	2.77	2.95	1.53	1.54	0.1	2.47	55	1	122	76	81	98	1	92	Weakness
12	2023-05-29T09:52:44.849002758Z	33.2	52.8	1.86	0.69	2.79	2.99	1.54	1.55	0.1	2.49	55	1	122	76	81	98	1	92	Weakness
12	2023-05-29T09:52:48.683670951Z	33.3	53.6	1.87	0.69	2.79	3.01	1.56	1.56	0.1	2.5	55	1	122	76	81	98	1	92	Weakness
12	2023-05-29T09:52:52.373772227Z	33.3	54.3	1.85	0.69	2.78	3.01	1.57	1.56	0.1	2.51	55	1	122	76	81	98	1	92	Weakness
12	2023-05-29T09:52:55.015811177Z	33.4	54.6	1.87	0.69	2.77	3.02	1.57	1.56	0.1	2.51	55	1	122	76	81	98	1	92	Weakness
12	2023-05-29T09:52:57.853459465Z	33.4	55	1.87	0.69	2.76	3.03	1.58	1.56	0.1	2.51	55	1	122	76	81	98	1	92	Weakness
12	2023-05-29T09:53:01.997862352Z	33.4	55.1	1.87	0.69	2.75	3.03	1.58	1.56	0.1	2.52	55	1	122	76	81	98	1	92	Weakness
12	2023-05-29T09:53:05.492854185Z	33.4	55.4	1.87	0.69	2.74	3.03	1.59	1.56	0.1	2.52	55	1	122	76	81	98	1	92	Weakness
12	2023-05-29T09:53:08.136459809Z	33.5	55.7	1.87	0.69	2.72	3.02	1.59	1.56	0.1	2.52	55	1	122	76	81	98	1	92	Weakness
12	2023-05-29T09:53:11.252521026Z	33.5	56	1.87	0.7	2.71	3.02	1.59	1.56	0.1	2.52	55	1	122	76	81	98	1	92	Weakness
12	2023-05-29T09:53:14.161731811Z	33.5	56.2	1.87	0.7	2.7	3.02	1.6	1.56	0.1	2.53	55	1	122	76	81	98	1	92	Weakness
12	2023-05-29T09:53:17.570968654Z	33.5	56.3	1.87	0.7	2.69	3.02	1.6	1.56	0.1	2.53	55	1	122	76	81	98	1	92	Weakness
12	2023-05-29T09:53:21.050631644Z	33.6	56.7	1.87	0.7	2.68	3.02	1.6	1.56	0.1	2.53	55	1	122	76	81	98	1	92	Weakness
12	2023-05-29T09:53:24.743097436Z	33.6	56.9	1.87	0.7	2.66	3.01	1.61	1.57	0.1	2.53	55	1	122	76	81	98	1	92	Weakness
12	2023-05-29T09:53:27.170769204Z	33.6	57.1	1.87	0.7	2.65	3.01	1.61	1.56	0.1	2.53	55	1	122	76	81	98	1	92	Weakness
12	2023-05-29T09:53:29.85345393Z	33.7	57.4	1.87	0.7	2.64	3.01	1.61	1.56	0.1	2.53	55	1	122	76	81	98	1	92	Weakness
12	2023-05-29T09:53:35.949932068Z	33.7	57.5	1.87	0.7	2.63	3.01	1.61	1.56	0.1	2.54	55	1	122	76	81	98	1	92	Weakness
12	2023-05-29T09:53:39.261899683Z	33.7	57.7	1.87	0.7	2.61	3	1.61	1.56	0.1	2.54	55	1	122	76	81	98	1	92	Weakness
12	2023-05-29T09:53:46.841621563Z	33.8	58	1.87	0.7	2.6	2.99	1.61	1.57	0.1	2.54	55	1	122	76	81	98	1	92	Weakness
12	2023-05-29T09:53:50.568343691Z	33.9	58.4	1.86	0.7	2.58	2.99	1.61	1.56	0.1	2.54	55	1	122	76	81	98	1	92	Weakness
12	2023-05-29T09:53:53.427181713Z	33.9	58.7	1.86	0.7	2.56	2.99	1.61	1.56	0.1	2.54	55	1	122	76	81	98	1	92	Weakness
12	2023-05-29T09:53:55.867816453Z	34	58.9	1.86	0.71	2.55	2.98	1.61	1.56	0.1	2.54	55	1	122	76	81	98	1	92	Weakness
12	2023-05-29T09:53:58.730219505Z	34	59	1.86	0.71	2.55	2.98	1.61	1.56	0.1	2.54	55	1	122	76	81	98	1	92	Weakness
12	2023-05-29T09:54:01.394025057Z	34	59.2	1.86	0.71	2.54	2.98	1.61	1.56	0.1	2.54	55	1	122	76	81	98	1	92	Weakness
12	2023-05-29T09:54:04.308525901Z	34	59.3	1.86	0.71	2.46	2.96	1.57	1.56	0.1	2.51	55	1	122	76	81	98	1	92	Weakness
12	2023-05-29T09:54:07.328827143Z	34	57	1.83	0.71	2.37	2.88	1.53	1.53	0.1	2.42	55	1	122	76	81	98	1	92	Weakness
12	2023-05-29T09:54:10.091200555Z	34	51.4	1.75	0.71	2.21	2.73	1.47	1.49	0.1	2.34	55	1	122	76	81	98	1	92	Weakness
12	2023-05-29T09:54:12.857660036Z	34	48.2	1.66	0.71	1.99	2.57	1.4	1.42	0.1	2.26	55	1	122	76	81	98	1	92	Weakness
12	2023-05-29T09:54:15.956589645Z	34	44.2	1.6	0.72	1.81	2.44	1.35	1.37	0.1	2.23	55	1	122	76	81	98	1	92	Weakness
12	2023-05-29T09:54:19.023440471Z	34	42.4	1.54	0.72	1.58	2.3	1.3	1.31	0.1	2.2	55	1	122	76	81	98	1	92	Weakness
12	2023-05-29T09:54:22.497071032Z	34	41	1.5	0.72	1.4	2.18	1.26	1.27	0.1	2.18	55	1	122	76	81	98	1	92	Weakness
12	2023-05-29T09:54:25.388622265Z	34	40.1	1.47	0.72	1.28	2.09	1.22	1.23	0.1	2.16	55	1	122	76	81	98	1	92	Weakness
12	2023-05-29T09:54:28.220084562Z	34	39	1.45	0.72	1.2	2.01	1.19	1.21	0.1	2.14	55	1	122	76	81	98	1	92	Weakness
12	2023-05-29T09:54:30.85828701Z	34	38.7	1.42	0.72	1.13	1.94	1.16	1.19	0.1	2.12	55	1	122	76	81	98	1	92	Weakness
12	2023-05-29T09:54:34.15903101Z	34	38.2	1.41	0.72	1.08	1.88	1.14	1.17	0.1	2.11	55	1	122	76	81	98	1	92	Weakness
12	2023-05-29T09:54:37.439835177Z	34	37.9	1.39	0.72	1.04	1.82	1.12	1.15	0.1	2.11	55	1	122	76	81	98	1	92	Weakness
12	2023-05-29T09:54:39.897120308Z	34	37.7	1.38	0.72	1	1.77	1.1	1.14	0.1	2.08	55	1	122	76	81	98	1	92	Weakness
12	2023-05-29T09:54:44.228667871Z	33.9	37.4	1.36	0.72	0.95	1.7	1.07	1.13	0.1	1.88	55	1	122	76	81	98	1	92	Weakness
12	2023-05-29T09:54:47.808451818Z	33.5	36.9	1.35	0.71	0.89	1.64	1.03	1.12	0.1	1.98	55	1	122	76	81	98	1	92	Weakness
12	2023-05-29T09:54:59.347456773Z	33.5	36.9	1.35	0.71	0.89	1.64	1.03	1.12	0.1	1.98	55	1	122	76	81	98	1	92	Weakness
12	2023-05-29T09:55:02.849888196Z	33.2	36.7	1.33	0.7	0.86	1.56	1.03	1.1	0.1	2.09	55	1	122	76	81	98	1	92	Weakness
12	2023-05-29T09:55:05.69100651Z	33.4	37.1	1.26	0.67	0.72	1.51	0.91	1.11	0.1	1.82	55	1	122	76	81	98	1	92	Weakness
12	2023-05-29T09:55:10.62616272Z	32.8	37.2	1.34	0.66	0.77	1.51	0.97	1.12	0.1	2.11	55	1	122	76	81	98	1	92	Weakness
12	2023-05-29T09:55:15.737304251Z	32.9	37.3	1.34	0.65	0.8	1.47	1	1.11	0.1	2.21	55	1	122	76	81	98	1	92	Weakness
12	2023-05-29T09:55:18.415955423Z	32.9	37.6	1.33	0.65	0.8	1.44	1.01	1.1	0.1	2.19	55	1	122	76	81	98	1	92	Weakness
12	2023-05-29T09:55:21.486183543Z	32.8	37.6	1.31	0.64	0.8	1.42	1	1.1	0.1	2.16	55	1	122	76	81	98	1	92	Weakness
12	2023-05-29T09:55:31.895509003Z	32.8	37.4	1.32	0.64	0.79	1.39	0.99	1.09	0.1	2.14	55	1	122	76	81	98	1	92	Weakness
12	2023-05-29T09:55:34.582701049Z	32.8	37.3	1.31	0.65	0.79	1.36	0.98	1.08	0.1	2.12	55	1	122	76	81	98	1	92	Weakness
12	2023-05-29T09:55:38.117974802Z	32.8	37.1	1.3	0.65	0.78	1.3	0.95	1.07	0.1	2.08	55	1	122	76	81	98	1	92	Weakness
12	2023-05-29T09:55:42.57310195Z	32.8	36.9	1.29	0.65	0.78	1.29	0.94	1.07	0.1	2.08	55	1	122	76	81	98	1	92	Weakness
12	2023-05-29T09:55:50.550508172Z	32.7	36.9	1.29	0.66	0.78	1.27	0.93	1.06	0.1	2.07	55	1	122	76	81	98	1	92	Weakness
12	2023-05-29T09:55:53.046885086Z	32.7	37	1.28	0.66	0.78	1.26	0.92	1.06	0.1	2.07	55	1	122	76	81	98	1	92	Weakness
12	2023-05-29T09:55:57.11935328Z	32.7	37.3	1.28	0.66	0.78	1.25	0.92	1.06	0.1	2.06	55	1	122	76	81	98	1	92	Weakness
12	2023-05-29T09:56:03.064385968Z	32.7	37.1	1.28	0.67	0.78	1.24	0.92	1.05	0.1	2.06	55	1	122	76	81	98	1	92	Weakness
12	2023-05-29T09:56:07.412832514Z	32.7	37.4	1.28	0.67	0.79	1.23	0.91	1.05	0.1	2.06	55	1	122	76	81	98	1	92	Weakness
12	2023-05-29T09:56:10.316693745Z	32.7	37.6	1.28	0.67	0.79	1.22	0.91	1.05	0.1	2.05	55	1	122	76	81	98	1	92	Weakness
12	2023-05-29T09:56:13.887204106Z	32.7	37.5	1.27	0.67	0.78	1.21	0.9	1.04	0.1	2.04	55	1	122	76	81	98	1	92	Weakness
12	2023-05-29T09:56:17.671704289Z	32.7	37.4	1.27	0.67	0.78	1.21	0.9	1.05	0.1	2.05	55	1	122	76	81	98	1	92	Weakness
12	2023-05-29T09:56:20.254172765Z	32.7	37.3	1.27	0.68	0.79	1.2	0.9	1.05	0.1	2.05	55	1	122	76	81	98	1	92	Weakness
12	2023-05-29T09:56:23.125224876Z	32.7	37.2	1.27	0.68	0.79	1.19	0.89	1.05	0.1	2.05	55	1	122	76	81	98	1	92	Weakness
12	2023-05-29T09:56:26.994072153Z	32.7	37.1	1.27	0.68	0.79	1.18	0.89	1.05	0.1	2.05	55	1	122	76	81	98	1	92	Weakness
12	2023-05-29T09:56:31.179501448Z	32.7	37.1	1.26	0.68	0.79	1.18	0.89	1.04	0.1	2.05	55	1	122	76	81	98	1	92	Weakness
12	2023-05-29T09:56:34.379547563Z	32.7	37.1	1.27	0.68	0.8	1.17	0.89	1.04	0.1	2.05	55	1	122	76	81	98	1	92	Weakness
12	2023-05-29T09:56:37.850476854Z	32.6	37.2	1.26	0.69	0.8	1.16	0.89	1.04	0.1	2.05	55	1	122	76	81	98	1	92	Weakness
12	2023-05-29T09:56:41.334016826Z	32.6	37.5	1.26	0.69	0.8	1.15	0.88	1.04	0.1	2.06	55	1	122	76	81	98	1	92	Weakness
12	2023-05-29T09:56:45.019750217Z	32.6	37.5	1.26	0.69	0.8	1.15	0.88	1.04	0.1	2.06	55	1	122	76	81	98	1	92	Weakness
12	2023-05-29T09:56:48.499623335Z	32.6	37.4	1.26	0.69	0.8	1.15	0.88	1.04	0.1	2.05	55	1	122	76	81	98	1	92	Weakness
12	2023-05-29T09:56:51.977917696Z	32.6	37.1	1.26	0.69	0.8	1.15	0.88	1.04	0.1	2.06	55	1	122	76	81	98	1	92	Weakness
12	2023-05-29T09:56:54.90025145Z	32.6	37.4	1.25	0.69	0.8	1.14	0.88	1.04	0.1	2.05	55	1	122	76	81	98	1	92	Weakness
12	2023-05-29T09:56:57.854505606Z	32.6	37.3	1.26	0.69	0.8	1.14	0.87	1.03	0.1	2.05	55	1	122	76	81	98	1	92	Weakness
12	2023-05-29T09:57:00.792315267Z	32.6	37.4	1.26	0.69	0.8	1.14	0.87	1.03	0.1	2.05	55	1	122	76	81	98	1	92	Weakness
12	2023-05-29T09:57:04.484012207Z	32.6	37.4	1.25	0.69	0.8	1.14	0.87	1.03	0.1	2.05	55	1	122	76	81	98	1	92	Weakness
12	2023-05-29T09:57:06.92487699Z	32.6	37.4	1.23	0.69	0.8	1.14	0.87	1.03	0.1	2.05	55	1	122	76	81	98	1	92	Weakness
12	2023-05-29T09:57:10.062781141Z	32.6	37.2	1.25	0.69	0.8	1.13	0.87	1.03	0.1	2.05	55	1	122	76	81	98	1	92	Weakness
12	2023-05-29T09:57:13.224661041Z	32.6	37.2	1.25	0.69	0.8	1.13	0.87	1.03	0.1	2.05	55	1	122	76	81	98	1	92	Weakness
12	2023-05-29T09:57:15.936608546Z	32.6	37.4	1.25	0.7	0.8	1.13	0.87	1.03	0.1	2.05	55	1	122	76	81	98	1	92	Weakness
12	2023-05-29T09:57:18.810685859Z	32.5	37.4	1.25	0.7	0.8	1.13	0.86	1.03	0.1	2.05	55	1	122	76	81	98	1	92	Weakness
12	2023-05-29T09:57:22.289578609Z	32.5	37.5	1.25	0.7	0.8	1.13	0.86	1.03	0.1	2.05	55	1	122	76	81	98	1	92	Weakness
12	2023-05-29T09:57:25.576097402Z	32.5	37.4	1.25	0.7	0.8	1.12	0.86	1.03	0.1	2.05	55	1	122	76	81	98	1	92	Weakness
12	2023-05-29T09:57:29.472422053Z	32.6	37.5	1.25	0.7	0.8	1.12	0.86	1.03	0.1	2.06	55	1	122	76	81	98	1	92	Weakness
12	2023-05-29T09:57:33.572857637Z	32.6	37.5	1.25	0.7	0.8	1.11	0.86	1.03	0.1	2.05	55	1	122	76	81	98	1	92	Weakness
12	2023-05-29T09:57:36.235339437Z	32.5	37.2	1.25	0.7	0.8	1.11	0.86	1.02	0.1	2.05	55	1	122	76	81	98	1	92	Weakness
12	2023-05-29T09:57:39.590161154Z	32.5	37.2	1.25	0.7	0.8	1.11	0.86	1.02	0.1	2.05	55	1	122	76	81	98	1	92	Weakness
12	2023-05-29T09:57:43.243550257Z	32.5	37.3	1.25	0.7	0.8	1.12	0.86	1.02	0.1	2.06	55	1	122	76	81	98	1	92	Weakness
12	2023-05-29T09:57:46.451201992Z	32.5	37.6	1.25	0.7	0.81	1.11	0.86	1.02	0.1	2.06	55	1	122	76	81	98	1	92	Weakness
12	2023-05-29T09:57:49.937854312Z	32.5	37.9	1.25	0.7	0.81	1.11	0.86	1.02	0.1	2.05	55	1	122	76	81	98	1	92	Weakness
12	2023-05-29T09:57:53.830031118Z	32.5	37.7	1.24	0.7	0.81	1.11	0.86	1.02	0.1	2.06	55	1	122	76	81	98	1	92	Weakness
13	2023-05-30T06:32:29.233147796Z	32	44.9	1.35	0.96	0.85	1.45	1.11	1.14	0.11	2.22	52	0	122	79	80	95	0	106
13	2023-05-30T06:32:32.110197638Z	32	44.9	1.35	0.96	0.85	1.45	1.11	1.14	0.11	2.22	52	0	122	79	80	95	0	106
13	2023-05-30T06:32:35.629302061Z	32	44.9	1.35	0.96	0.85	1.45	1.11	1.14	0.11	2.21	52	0	122	79	80	95	0	106
13	2023-05-30T06:32:38.886897792Z	32	44.9	1.35	0.96	0.85	1.44	1.11	1.14	0.11	2.21	52	0	122	79	80	95	0	106
13	2023-05-30T06:32:41.796678675Z	32	44.9	1.35	0.95	0.85	1.44	1.1	1.14	0.11	2.21	52	0	122	79	80	95	0	106
13	2023-05-30T06:32:44.96193899Z	32	45	1.35	0.95	0.85	1.44	1.11	1.14	0.11	2.21	52	0	122	79	80	95	0	106
13	2023-05-30T06:32:48.834765339Z	32	45.2	1.35	0.95	0.85	1.44	1.11	1.14	0.11	2.21	52	0	122	79	80	95	0	106
13	2023-05-30T06:32:53.027190358Z	32	45.2	1.35	0.95	0.85	1.44	1.1	1.14	0.11	2.22	52	0	122	79	80	95	0	106
13	2023-05-30T06:32:56.775703116Z	32	45.1	1.35	0.95	0.85	1.44	1.1	1.14	0.11	2.22	52	0	122	79	80	95	0	106
13	2023-05-30T06:33:02.228620849Z	32	45.1	1.35	0.95	0.85	1.44	1.1	1.14	0.11	2.21	52	0	122	79	80	95	0	106
13	2023-05-30T06:33:07.765482605Z	32.1	44.9	1.35	0.95	0.85	1.44	1.1	1.14	0.11	2.21	52	0	122	79	80	95	0	106
13	2023-05-30T06:33:10.845098148Z	32.1	44.8	1.35	0.95	0.85	1.45	1.1	1.14	0.11	2.21	52	0	122	79	80	95	0	106
13	2023-05-30T06:33:14.446680123Z	32.1	45	1.35	0.95	0.85	1.44	1.1	1.14	0.11	2.22	52	0	122	79	80	95	0	106
13	2023-05-30T06:33:17.152731973Z	32	45	1.35	0.95	0.85	1.44	1.1	1.14	0.11	2.21	52	0	122	79	80	95	0	106
13	2023-05-30T06:33:19.821554673Z	32	44.8	1.33	0.95	0.85	1.44	1.1	1.14	0.11	2.21	52	0	122	79	80	95	0	106
13	2023-05-30T06:33:22.281230958Z	32	44.7	1.35	0.95	0.85	1.44	1.1	1.14	0.11	2.21	52	0	122	79	80	95	0	106
13	2023-05-30T06:33:25.351636404Z	32	44.8	1.35	0.95	0.85	1.44	1.1	1.14	0.11	2.22	52	0	122	79	80	95	0	106
13	2023-05-30T06:33:27.793588993Z	32	44.8	1.35	0.95	0.85	1.44	1.1	1.14	0.11	2.22	52	0	122	79	80	95	0	106
13	2023-05-30T06:33:30.264905762Z	32	44.8	1.35	0.95	0.85	1.44	1.1	1.14	0.11	2.22	52	0	122	79	80	95	0	106
13	2023-05-30T06:33:32.709256612Z	32	45	1.35	0.95	0.85	1.44	1.1	1.14	0.11	2.22	52	0	122	79	80	95	0	106
13	2023-05-30T06:33:35.379707171Z	32	45	1.36	0.95	0.85	1.44	1.1	1.14	0.11	2.22	52	0	122	79	80	95	0	106
13	2023-05-30T06:33:37.828268146Z	32	45	1.35	0.95	0.85	1.44	1.1	1.14	0.11	2.22	52	0	122	79	80	95	0	106
13	2023-05-30T06:33:40.504755712Z	32	45	1.35	0.95	0.85	1.44	1.1	1.14	0.11	2.22	52	0	122	79	80	95	0	106
13	2023-05-30T06:33:42.980835186Z	32	44.9	1.35	0.95	0.85	1.44	1.1	1.14	0.11	2.22	52	0	122	79	80	95	0	106
13	2023-05-30T06:33:45.423518166Z	32.1	45.1	1.35	0.95	0.85	1.44	1.1	1.14	0.11	2.22	52	0	122	79	80	95	0	106
13	2023-05-30T06:33:48.096120804Z	32	45	1.35	0.94	0.85	1.44	1.1	1.14	0.11	2.22	52	0	122	79	80	95	0	106
13	2023-05-30T06:33:50.543306594Z	32.1	44.9	1.35	0.94	0.85	1.44	1.1	1.14	0.11	2.23	52	0	122	79	80	95	0	106
13	2023-05-30T06:33:53.197702326Z	32	45	1.35	0.94	0.85	1.44	1.1	1.14	0.11	2.22	52	0	122	79	80	95	0	106
13	2023-05-30T06:33:55.654909753Z	32	45.1	1.35	0.94	0.85	1.44	1.1	1.14	0.11	2.22	52	0	122	79	80	95	0	106
13	2023-05-30T06:33:58.320667003Z	32	45.1	1.35	0.94	0.85	1.44	1.1	1.14	0.11	2.22	52	0	122	79	80	95	0	106
13	2023-05-30T06:34:00.770100296Z	32	44.9	1.35	0.94	0.85	1.44	1.1	1.14	0.11	2.22	52	0	122	79	80	95	0	106
13	2023-05-30T06:34:03.224514466Z	32	44.7	1.35	0.94	0.85	1.44	1.1	1.14	0.11	2.22	52	0	122	79	80	95	0	106
13	2023-05-30T06:34:06.749785045Z	32	44.6	1.35	0.94	0.85	1.44	1.1	1.14	0.11	2.23	52	0	122	79	80	95	0	106
13	2023-05-30T06:34:10.40995973Z	32	44.8	1.36	0.94	0.85	1.44	1.1	1.14	0.11	2.22	52	0	122	79	80	95	0	106
13	2023-05-30T06:34:13.689908267Z	32	44.7	1.35	0.94	0.85	1.44	1.1	1.14	0.11	2.22	52	0	122	79	80	95	0	106
13	2023-05-30T06:34:17.172657716Z	32	44.9	1.35	0.94	0.85	1.44	1.1	1.14	0.11	2.21	52	0	122	79	80	95	0	106
13	2023-05-30T06:34:20.080677454Z	32	44.9	1.35	0.94	0.85	1.44	1.1	1.14	0.11	2.22	52	0	122	79	80	95	0	106
13	2023-05-30T06:34:23.715821948Z	32	44.9	1.35	0.94	0.85	1.43	1.09	1.14	0.11	2.22	52	0	122	79	80	95	0	106
13	2023-05-30T06:34:26.820659927Z	32	44.9	1.35	0.94	0.85	1.43	1.09	1.14	0.11	2.23	52	0	122	79	80	95	0	106
13	2023-05-30T06:34:30.296893053Z	32	44.9	1.35	0.94	0.85	1.43	1.09	1.14	0.11	2.23	52	0	122	79	80	95	0	106
13	2023-05-30T06:34:33.754378076Z	32	45	1.36	0.94	0.85	1.43	1.09	1.14	0.11	2.22	52	0	122	79	80	95	0	106
13	2023-05-30T06:34:37.845961853Z	32	44.8	1.36	0.94	0.85	1.43	1.09	1.14	0.11	2.22	52	0	122	79	80	95	0	106
13	2023-05-30T06:34:41.128707629Z	32	44.8	1.35	0.94	0.85	1.43	1.09	1.14	0.11	2.22	52	0	122	79	80	95	0	106
13	2023-05-30T06:34:43.992091514Z	32	44.9	1.36	0.94	0.85	1.43	1.09	1.14	0.11	2.23	52	0	122	79	80	95	0	106
13	2023-05-30T06:34:47.277942613Z	32.1	45.1	1.36	0.94	0.85	1.43	1.09	1.15	0.11	2.23	52	0	122	79	80	95	0	106
13	2023-05-30T06:34:50.950685884Z	32.1	45.1	1.36	0.94	0.85	1.43	1.09	1.14	0.11	2.23	52	0	122	79	80	95	0	106
13	2023-05-30T06:34:53.620778314Z	32	44.8	1.36	0.94	0.85	1.43	1.09	1.14	0.11	2.23	52	0	122	79	80	95	0	106
13	2023-05-30T06:34:57.106005933Z	32.1	44.8	1.36	0.94	0.85	1.42	1.09	1.14	0.11	2.23	52	0	122	79	80	95	0	106
13	2023-05-30T06:35:01.310183408Z	32.1	44.8	1.36	0.94	0.85	1.42	1.09	1.14	0.11	2.22	52	0	122	79	80	95	0	106
13	2023-05-30T06:35:04.475670819Z	32	44.7	1.36	0.94	0.85	1.42	1.09	1.14	0.11	2.23	52	0	122	79	80	95	0	106
13	2023-05-30T06:35:08.511661608Z	32.1	44.9	1.35	0.94	0.85	1.42	1.09	1.14	0.11	2.23	52	0	122	79	80	95	0	106
13	2023-05-30T06:35:11.878418683Z	32.1	44.8	1.35	0.94	0.85	1.42	1.09	1.14	0.11	2.23	52	0	122	79	80	95	0	106
13	2023-05-30T06:35:23.170244863Z	32.1	44.8	1.35	0.94	0.85	1.42	1.08	1.14	0.11	2.23	52	0	122	79	80	95	0	106
13	2023-05-30T06:35:29.040385398Z	32.1	44.8	1.35	0.94	0.85	1.42	1.09	1.14	0.11	2.23	52	0	122	79	80	95	0	106
13	2023-05-30T06:35:31.717525417Z	32.1	44.5	1.35	0.93	0.85	1.41	1.09	1.14	0.11	2.22	52	0	122	79	80	95	0	106
13	2023-05-30T06:35:34.565634766Z	32.1	44.3	1.35	0.93	0.85	1.41	1.08	1.14	0.11	2.22	52	0	122	79	80	95	0	106
13	2023-05-30T06:35:37.844054807Z	32.1	44.4	1.35	0.93	0.85	1.41	1.08	1.14	0.11	2.23	52	0	122	79	80	95	0	106
13	2023-05-30T06:35:48.497433422Z	32.1	44.4	1.35	0.93	0.85	1.41	1.08	1.14	0.11	2.23	52	0	122	79	80	95	0	106
13	2023-05-30T06:35:51.199820985Z	32.1	44.3	1.35	0.93	0.85	1.41	1.09	1.14	0.11	2.23	52	0	122	79	80	95	0	106
13	2023-05-30T06:35:54.857965544Z	32.1	44.4	1.35	0.93	0.84	1.4	1.08	1.14	0.11	2.23	52	0	122	79	80	95	0	106
13	2023-05-30T06:35:58.53591199Z	32.1	44.7	1.35	0.92	0.84	1.4	1.08	1.14	0.11	2.23	52	0	122	79	80	95	0	106
13	2023-05-30T06:36:06.312370491Z	32.1	44.6	1.35	0.93	0.84	1.4	1.08	1.14	0.11	2.23	52	0	122	79	80	95	0	106
13	2023-05-30T06:36:10.111881292Z	32.1	44.8	1.33	0.92	0.84	1.4	1.08	1.14	0.11	2.23	52	0	122	79	80	95	0	106
13	2023-05-30T06:36:13.280474238Z	32.1	44.7	1.35	0.92	0.84	1.4	1.07	1.14	0.11	2.23	52	0	122	79	80	95	0	106
13	2023-05-30T06:36:16.353597411Z	32.2	44.7	1.34	0.92	0.84	1.4	1.07	1.13	0.11	2.21	52	0	122	79	80	95	0	106
13	2023-05-30T06:36:19.033854054Z	32.2	44.5	1.34	0.92	0.84	1.4	1.07	1.14	0.11	2.22	52	0	122	79	80	95	0	106
13	2023-05-30T06:36:21.889178512Z	32.2	44.3	1.34	0.92	0.84	1.4	1.07	1.14	0.11	2.22	52	0	122	79	80	95	0	106
13	2023-05-30T06:36:33.143037427Z	32.1	44.2	1.34	0.92	0.84	1.4	1.07	1.14	0.11	2.22	52	0	122	79	80	95	0	106
13	2023-05-30T06:36:43.640271712Z	32.1	44.3	1.34	0.92	0.84	1.39	1.07	1.14	0.11	2.22	52	0	122	79	80	95	0	106
13	2023-05-30T06:36:53.836148147Z	32.1	44.3	1.34	0.92	0.84	1.39	1.07	1.14	0.11	2.22	52	0	122	79	80	95	0	106
13	2023-05-30T06:36:57.283310622Z	32.2	44.5	1.35	0.92	0.84	1.4	1.07	1.14	0.11	2.22	52	0	122	79	80	95	0	106
13	2023-05-30T06:37:00.036082099Z	32.2	44.3	1.34	0.91	0.84	1.4	1.07	1.14	0.11	2.23	52	0	122	79	80	95	0	106
13	2023-05-30T06:37:03.880567026Z	32.2	44.5	1.34	0.91	0.84	1.39	1.06	1.14	0.11	2.23	52	0	122	79	80	95	0	106
13	2023-05-30T06:37:10.759180251Z	32.2	44.5	1.34	0.91	0.84	1.39	1.06	1.13	0.11	2.23	52	0	122	79	80	95	0	106
13	2023-05-30T06:37:15.331882302Z	32.2	44.5	1.34	0.91	0.84	1.39	1.06	1.13	0.11	2.23	52	0	122	79	80	95	0	106
13	2023-05-30T06:37:18.203551991Z	32.2	44.4	1.34	0.9	0.84	1.39	1.06	1.13	0.11	2.23	52	0	122	79	80	95	0	106
13	2023-05-30T06:37:20.870263008Z	32.2	44.2	1.34	0.9	0.83	1.39	1.06	1.13	0.11	2.22	52	0	122	79	80	95	0	106
13	2023-05-30T06:37:23.333458431Z	32.2	44.3	1.34	0.9	0.83	1.39	1.06	1.13	0.11	2.22	52	0	122	79	80	95	0	106
13	2023-05-30T06:37:26.189741454Z	32.2	44.3	1.34	0.9	0.83	1.39	1.06	1.13	0.11	2.22	52	0	122	79	80	95	0	106
13	2023-05-30T06:37:29.543403198Z	32.2	44.2	1.34	0.9	0.83	1.39	1.06	1.13	0.11	2.22	52	0	122	79	80	95	0	106
13	2023-05-30T06:37:32.957402337Z	32.2	44.1	1.34	0.9	0.83	1.39	1.06	1.13	0.11	2.23	52	0	122	79	80	95	0	106
13	2023-05-30T06:37:35.834780892Z	32.2	44.2	1.34	0.9	0.83	1.39	1.06	1.13	0.11	2.22	52	0	122	79	80	95	0	106
13	2023-05-30T06:37:38.899309396Z	32.2	44.3	1.33	0.9	0.83	1.39	1.06	1.13	0.11	2.23	52	0	122	79	80	95	0	106
13	2023-05-30T06:37:41.35836085Z	32.2	44.3	1.34	0.9	0.83	1.39	1.06	1.13	0.11	2.23	52	0	122	79	80	95	0	106
13	2023-05-30T06:37:44.839428826Z	32.2	44.2	1.34	0.9	0.83	1.39	1.06	1.13	0.11	2.22	52	0	122	79	80	95	0	106
13	2023-05-30T06:37:48.125506623Z	32.2	44.2	1.34	0.9	0.83	1.39	1.06	1.14	0.11	2.23	52	0	122	79	80	95	0	106
13	2023-05-30T06:37:50.980019307Z	32.2	44.4	1.34	0.89	0.83	1.39	1.06	1.13	0.11	2.23	52	0	122	79	80	95	0	106
13	2023-05-30T06:37:54.256531872Z	32.2	44.5	1.34	0.9	0.83	1.4	1.04	1.14	0.11	2.24	52	0	122	79	80	95	0	106
13	2023-05-30T06:37:57.538027737Z	32.2	44.9	1.34	0.9	0.84	1.4	1.04	1.14	0.11	2.24	52	0	122	79	80	95	0	106
13	2023-05-30T06:38:00.440832303Z	32.1	45.3	1.35	0.9	0.84	1.41	1.04	1.14	0.11	2.25	52	0	122	79	80	95	0	106
13	2023-05-30T06:38:04.307922997Z	32.1	45.7	1.35	0.89	0.84	1.41	1.05	1.14	0.11	2.26	52	0	122	79	80	95	0	106
13	2023-05-30T06:38:07.570905783Z	32.2	46.3	1.35	0.89	0.84	1.42	1.05	1.14	0.11	2.26	52	0	122	79	80	95	0	106
13	2023-05-30T06:38:10.083254419Z	32.2	46.8	1.36	0.89	0.85	1.43	1.06	1.15	0.11	2.27	52	0	122	79	80	95	0	106
13	2023-05-30T06:38:13.389604624Z	32.2	47.3	1.36	0.89	0.85	1.43	1.06	1.15	0.11	2.27	52	0	122	79	80	95	0	106
13	2023-05-30T06:38:16.790184931Z	32.3	47.8	1.36	0.89	0.85	1.43	1.07	1.15	0.11	2.28	52	0	122	79	80	95	0	106
13	2023-05-30T06:38:20.1168754Z	32.3	48.3	1.39	0.89	0.86	1.44	1.09	1.18	0.11	2.31	52	0	122	79	80	95	0	106
13	2023-05-30T06:38:23.334774035Z	32.3	48.9	1.47	0.89	0.94	1.5	1.14	1.23	0.11	2.36	52	0	122	79	80	95	0	106
13	2023-05-30T06:38:26.4516483Z	32.4	49.9	1.57	0.9	1.06	1.62	1.24	1.31	0.11	2.43	52	0	122	79	80	95	0	106
13	2023-05-30T06:38:29.276059513Z	32.4	51.1	1.68	0.91	1.32	1.86	1.35	1.39	0.11	2.5	52	0	122	79	80	95	0	106
13	2023-05-30T06:38:31.955340039Z	32.4	52.5	1.77	0.92	1.58	2.09	1.44	1.47	0.11	2.55	52	0	122	79	80	95	0	106
13	2023-05-30T06:38:35.430143346Z	32.4	53.8	1.85	0.93	1.82	2.29	1.54	1.55	0.11	2.6	52	0	122	79	80	95	0	106
13	2023-05-30T06:38:38.706160636Z	32.4	55.1	1.94	0.94	2.06	2.49	1.64	1.63	0.11	2.66	52	0	122	79	80	95	0	106
13	2023-05-30T06:38:41.774151888Z	32.4	56.3	1.99	0.95	2.21	2.63	1.71	1.69	0.11	2.69	52	0	122	79	80	95	0	106
13	2023-05-30T06:38:44.427658776Z	32.5	57.2	2.02	0.96	2.3	2.72	1.74	1.72	0.1	2.69	52	0	122	79	80	95	0	106
13	2023-05-30T06:38:47.488472331Z	32.4	57.5	2.04	0.96	2.34	2.78	1.76	1.74	0.11	2.71	52	0	122	79	80	95	0	106
13	2023-05-30T06:38:50.168987027Z	32.4	57.8	2.05	0.96	2.38	2.82	1.78	1.75	0.11	2.71	52	0	122	79	80	95	0	106
13	2023-05-30T06:38:53.232995918Z	32.5	58.3	2.06	0.96	2.4	2.84	1.79	1.77	0.11	2.73	52	0	122	79	80	95	0	106
13	2023-05-30T06:38:56.912690337Z	32.5	58.7	2.07	0.96	2.4	2.86	1.8	1.78	0.11	2.73	52	0	122	79	80	95	0	106
13	2023-05-30T06:39:01.065015721Z	32.5	58.9	2.07	0.97	2.4	2.88	1.81	1.79	0.11	2.74	52	0	122	79	80	95	0	106
13	2023-05-30T06:39:05.315156412Z	32.5	59.3	2.08	0.97	2.39	2.88	1.82	1.79	0.11	2.74	52	0	122	79	80	95	0	106
13	2023-05-30T06:39:08.199824567Z	32.6	59.6	2.08	0.97	2.38	2.89	1.82	1.79	0.11	2.74	52	0	122	79	80	95	0	106
13	2023-05-30T06:39:11.066338431Z	32.6	60	2.08	0.97	2.38	2.9	1.82	1.79	0.11	2.74	52	0	122	79	80	95	0	106
13	2023-05-30T06:39:13.712099449Z	32.6	60.2	2.08	0.97	2.37	2.9	1.83	1.79	0.11	2.74	52	0	122	79	80	95	0	106
13	2023-05-30T06:39:16.373899766Z	32.6	60.5	2.08	0.96	2.36	2.9	1.83	1.79	0.11	2.74	52	0	122	79	80	95	0	106
13	2023-05-30T06:39:20.289617962Z	32.7	60.8	2.08	0.96	2.35	2.9	1.83	1.79	0.11	2.74	52	0	122	79	80	95	0	106
13	2023-05-30T06:39:23.154462472Z	32.7	60.9	2.08	0.96	2.34	2.9	1.82	1.79	0.11	2.74	52	0	122	79	80	95	0	106
13	2023-05-30T06:39:26.201392345Z	32.7	61.3	2.08	0.96	2.33	2.9	1.82	1.79	0.11	2.74	52	0	122	79	80	95	0	106
13	2023-05-30T06:39:29.478170251Z	32.8	61.6	2.07	0.96	2.32	2.9	1.82	1.78	0.11	2.74	52	0	122	79	80	95	0	106
13	2023-05-30T06:39:32.988466926Z	32.8	61.9	2.07	0.96	2.3	2.9	1.81	1.78	0.11	2.74	52	0	122	79	80	95	0	106
13	2023-05-30T06:39:35.83502197Z	32.8	62.2	2.07	0.96	2.29	2.89	1.81	1.78	0.11	2.74	52	0	122	79	80	95	0	106
13	2023-05-30T06:39:38.696330008Z	32.8	62.5	2.07	0.96	2.28	2.89	1.81	1.78	0.11	2.74	52	0	122	79	80	95	0	106
13	2023-05-30T06:39:41.557230117Z	32.8	62.7	2.06	0.96	2.27	2.88	1.8	1.77	0.11	2.73	52	0	122	79	80	95	0	106
13	2023-05-30T06:39:44.654639617Z	32.8	63	2.06	0.96	2.26	2.88	1.8	1.77	0.11	2.73	52	0	122	79	80	95	0	106
13	2023-05-30T06:39:47.565113403Z	32.9	63.3	2.06	0.95	2.25	2.88	1.8	1.77	0.11	2.73	52	0	122	79	80	95	0	106
13	2023-05-30T06:39:50.580074535Z	32.9	63.5	2.06	0.95	2.24	2.87	1.8	1.77	0.11	2.73	52	0	122	79	80	95	0	106
13	2023-05-30T06:39:53.434445154Z	32.9	63.8	2.05	0.95	2.23	2.87	1.8	1.76	0.11	2.73	52	0	122	79	80	95	0	106
13	2023-05-30T06:39:56.308722986Z	32.9	64	2.05	0.95	2.22	2.87	1.79	1.76	0.11	2.73	52	0	122	79	80	95	0	106
13	2023-05-30T06:39:59.186682485Z	32.9	64.2	2.05	0.95	2.21	2.86	1.79	1.76	0.11	2.73	52	0	122	79	80	95	0	106
13	2023-05-30T06:40:01.845506376Z	32.9	64.4	2.04	0.95	2.21	2.86	1.79	1.75	0.11	2.73	52	0	122	79	80	95	0	106
13	2023-05-30T06:40:05.165887752Z	33	64.7	2.04	0.95	2.2	2.86	1.78	1.75	0.11	2.73	52	0	122	79	80	95	0	106
13	2023-05-30T06:40:07.778527207Z	33	64.8	2.04	0.95	2.18	2.85	1.78	1.75	0.11	2.73	52	0	122	79	80	95	0	106
13	2023-05-30T06:40:10.457415715Z	33	65	2.04	0.94	2.18	2.85	1.78	1.75	0.11	2.72	52	0	122	79	80	95	0	106
13	2023-05-30T06:40:14.43662524Z	33	65.3	2.04	0.94	2.17	2.85	1.77	1.74	0.11	2.72	52	0	122	79	80	95	0	106
13	2023-05-30T06:40:17.448674856Z	33.1	65.5	2.03	0.94	2.15	2.84	1.77	1.74	0.11	2.72	52	0	122	79	80	95	0	106
13	2023-05-30T06:40:20.092332353Z	33.1	65.8	2.03	0.94	2.14	2.84	1.77	1.74	0.11	2.72	52	0	122	79	80	95	0	106
13	2023-05-30T06:40:23.562183347Z	33.1	65.9	2.03	0.94	2.14	2.84	1.77	1.73	0.11	2.72	52	0	122	79	80	95	0	106
13	2023-05-30T06:40:26.886876524Z	33.1	66.2	2.02	0.94	2.13	2.83	1.76	1.73	0.11	2.72	52	0	122	79	80	95	0	106
13	2023-05-30T06:40:29.707562618Z	33.1	66.4	2.02	0.94	2.12	2.83	1.76	1.73	0.11	2.72	52	0	122	79	80	95	0	106
13	2023-05-30T06:40:32.558571016Z	33.1	66.7	2.01	0.93	2.1	2.82	1.75	1.72	0.11	2.72	52	0	122	79	80	95	0	106
13	2023-05-30T06:40:35.436988195Z	33.1	66.8	2.01	0.93	2.1	2.82	1.75	1.72	0.11	2.71	52	0	122	79	80	95	0	106
13	2023-05-30T06:40:38.718006497Z	33.1	67	2.01	0.93	2.09	2.82	1.75	1.72	0.11	2.72	52	0	122	79	80	95	0	106
13	2023-05-30T06:40:41.821158288Z	33.1	67.2	2.01	0.93	2.08	2.81	1.74	1.72	0.11	2.71	52	0	122	79	80	95	0	106
13	2023-05-30T06:40:45.06288893Z	33.1	67.4	2	0.93	2.06	2.81	1.74	1.71	0.11	2.71	52	0	122	79	80	95	0	106
13	2023-05-30T06:40:47.722266138Z	33.2	67.7	2	0.93	1.99	2.79	1.72	1.7	0.11	2.67	52	0	122	79	80	95	0	106
13	2023-05-30T06:40:50.805615728Z	33.2	64.3	1.98	0.92	1.85	2.73	1.64	1.66	0.11	2.57	52	0	122	79	80	95	0	106
13	2023-05-30T06:40:56.835332354Z	33.2	59.6	1.9	0.92	1.72	2.6	1.58	1.6	0.11	2.51	52	0	122	79	80	95	0	106
13	2023-05-30T06:40:59.385819323Z	33.2	55	1.76	0.91	1.43	2.34	1.46	1.48	0.11	2.4	52	0	122	79	80	95	0	106
13	2023-05-30T06:41:03.314814581Z	33.1	49.4	1.71	0.91	1.3	2.23	1.41	1.44	0.11	2.38	52	0	122	79	80	95	0	106
13	2023-05-30T06:41:06.349693929Z	33.1	48.4	1.67	0.9	1.21	2.14	1.37	1.39	0.11	2.34	52	0	122	79	80	95	0	106
13	2023-05-30T06:41:09.647165603Z	33.1	47.5	1.63	0.9	1.16	2.07	1.34	1.36	0.11	2.32	52	0	122	79	80	95	0	106
13	2023-05-30T06:41:12.293366928Z	33.1	46.9	1.6	0.9	1.1	2.01	1.31	1.33	0.11	2.31	52	0	122	79	80	95	0	106
13	2023-05-30T06:41:15.07667531Z	33.1	46.3	1.58	0.89	1.06	1.96	1.29	1.31	0.11	2.3	52	0	122	79	80	95	0	106
13	2023-05-30T06:41:18.041024651Z	33.1	46	1.55	0.88	1.03	1.92	1.27	1.29	0.11	2.28	52	0	122	79	80	95	0	106
13	2023-05-30T06:41:20.524324045Z	33.1	45.8	1.54	0.89	1.01	1.87	1.26	1.28	0.11	2.28	52	0	122	79	80	95	0	106
13	2023-05-30T06:41:23.96862269Z	33.1	45.4	1.53	0.89	0.99	1.83	1.24	1.27	0.11	2.27	52	0	122	79	80	95	0	106
13	2023-05-30T06:41:27.47326155Z	33	45.1	1.52	0.89	0.97	1.78	1.23	1.26	0.11	2.27	52	0	122	79	80	95	0	106
13	2023-05-30T06:41:30.799346204Z	33	44.8	1.51	0.89	0.96	1.75	1.22	1.25	0.11	2.27	52	0	122	79	80	95	0	106
13	2023-05-30T06:41:33.993699847Z	33	44.5	1.5	0.88	0.95	1.71	1.21	1.24	0.11	2.26	52	0	122	79	80	95	0	106
13	2023-05-30T06:41:37.495567682Z	33	44.7	1.49	0.88	0.95	1.7	1.2	1.23	0.11	2.26	52	0	122	79	80	95	0	106
13	2023-05-30T06:41:40.558391779Z	32.9	44.7	1.48	0.88	0.94	1.67	1.19	1.23	0.11	2.25	52	0	122	79	80	95	0	106
13	2023-05-30T06:41:44.249412395Z	32.9	44.6	1.47	0.88	0.93	1.65	1.18	1.22	0.11	2.25	52	0	122	79	80	95	0	106
13	2023-05-30T06:41:47.307090353Z	32.9	44.5	1.46	0.88	0.93	1.63	1.18	1.22	0.11	2.25	52	0	122	79	80	95	0	106
13	2023-05-30T06:41:50.78524896Z	32.9	44.2	1.46	0.87	0.92	1.61	1.17	1.21	0.11	2.24	52	0	122	79	80	95	0	106
13	2023-05-30T06:41:53.922746541Z	32.9	44.4	1.45	0.87	0.92	1.6	1.16	1.2	0.11	2.25	52	0	122	79	80	95	0	106
13	2023-05-30T06:41:57.362993777Z	32.9	44.5	1.45	0.87	0.91	1.58	1.15	1.2	0.11	2.24	52	0	122	79	80	95	0	106
13	2023-05-30T06:42:00.245328843Z	32.8	44.4	1.44	0.87	0.91	1.57	1.15	1.2	0.11	2.24	52	0	122	79	80	95	0	106
13	2023-05-30T06:42:03.087198024Z	32.9	44.4	1.44	0.87	0.91	1.56	1.14	1.19	0.11	2.24	52	0	122	79	80	95	0	106
13	2023-05-30T06:42:06.155246129Z	32.9	44.5	1.44	0.87	0.91	1.55	1.14	1.19	0.11	2.23	52	0	122	79	80	95	0	106
13	2023-05-30T06:42:09.432811653Z	32.9	44.4	1.43	0.87	0.91	1.54	1.14	1.19	0.11	2.24	52	0	122	79	80	95	0	106
13	2023-05-30T06:42:12.917771529Z	32.9	44.3	1.43	0.87	0.9	1.53	1.13	1.19	0.11	2.23	52	0	122	79	80	95	0	106
13	2023-05-30T06:42:16.283787484Z	32.9	44.2	1.43	0.86	0.9	1.53	1.13	1.18	0.11	2.23	52	0	122	79	80	95	0	106
13	2023-05-30T06:42:19.865387311Z	32.9	44.2	1.42	0.86	0.9	1.53	1.12	1.18	0.11	2.23	52	0	122	79	80	95	0	106
13	2023-05-30T06:42:22.535026143Z	32.9	44	1.42	0.86	0.9	1.52	1.12	1.18	0.11	2.23	52	0	122	79	80	95	0	106
13	2023-05-30T06:42:26.021712312Z	32.9	44.1	1.42	0.86	0.9	1.52	1.12	1.18	0.11	2.23	52	0	122	79	80	95	0	106
13	2023-05-30T06:42:28.895231402Z	32.8	43.9	1.41	0.86	0.9	1.51	1.11	1.18	0.11	2.23	52	0	122	79	80	95	0	106
13	2023-05-30T06:42:32.370945674Z	32.9	44	1.41	0.86	0.89	1.51	1.11	1.18	0.11	2.23	52	0	122	79	80	95	0	106
13	2023-05-30T06:42:35.654014269Z	32.8	44.1	1.41	0.86	0.9	1.5	1.11	1.17	0.11	2.23	52	0	122	79	80	95	0	106
13	2023-05-30T06:42:38.510959863Z	32.8	44.1	1.41	0.86	0.9	1.5	1.1	1.17	0.11	2.24	52	0	122	79	80	95	0	106
13	2023-05-30T06:42:41.394828954Z	32.8	44.4	1.41	0.86	0.9	1.5	1.1	1.17	0.11	2.24	52	0	122	79	80	95	0	106
13	2023-05-30T06:42:45.082687176Z	32.8	44.6	1.41	0.86	0.9	1.49	1.1	1.17	0.11	2.24	52	0	122	79	80	95	0	106
13	2023-05-30T06:42:48.554272209Z	32.8	44.4	1.41	0.86	0.89	1.48	1.1	1.17	0.11	2.23	52	0	122	79	80	95	0	106
13	2023-05-30T06:42:51.635856126Z	32.8	44.2	1.41	0.86	0.89	1.48	1.1	1.17	0.11	2.23	52	0	122	79	80	95	0	106
13	2023-05-30T06:42:55.308354171Z	32.8	44	1.4	0.85	0.89	1.48	1.1	1.17	0.11	2.23	52	0	122	79	80	95	0	106
13	2023-05-30T06:42:58.166853135Z	32.8	44	1.4	0.85	0.89	1.47	1.09	1.17	0.11	2.23	52	0	122	79	80	95	0	106
13	2023-05-30T06:43:01.242042142Z	32.8	43.9	1.4	0.85	0.89	1.47	1.09	1.17	0.11	2.23	52	0	122	79	80	95	0	106
13	2023-05-30T06:43:04.730771419Z	32.8	43.9	1.4	0.85	0.89	1.47	1.09	1.17	0.11	2.23	52	0	122	79	80	95	0	106
13	2023-05-30T06:43:08.434210755Z	32.8	43.8	1.4	0.85	0.89	1.46	1.09	1.17	0.11	2.22	52	0	122	79	80	95	0	106
13	2023-05-30T06:43:12.407657095Z	32.8	43.9	1.39	0.85	0.89	1.46	1.09	1.16	0.11	2.22	52	0	122	79	80	95	0	106
13	2023-05-30T06:43:14.978825466Z	32.8	43.9	1.39	0.85	0.88	1.46	1.08	1.16	0.11	2.22	52	0	122	79	80	95	0	106
13	2023-05-30T06:43:18.263494911Z	32.7	43.8	1.39	0.85	0.88	1.46	1.08	1.16	0.11	2.23	52	0	122	79	80	95	0	106
13	2023-05-30T06:43:21.314752696Z	32.8	43.9	1.39	0.85	0.88	1.46	1.08	1.16	0.1	2.22	52	0	122	79	80	95	0	106
13	2023-05-30T06:43:23.97523159Z	32.8	43.8	1.39	0.85	0.88	1.45	1.08	1.16	0.11	2.22	52	0	122	79	80	95	0	106
13	2023-05-30T06:43:27.049153434Z	32.7	43.7	1.39	0.85	0.88	1.45	1.08	1.16	0.11	2.22	52	0	122	79	80	95	0	106
13	2023-05-30T06:43:30.334902345Z	32.7	43.4	1.38	0.84	0.88	1.45	1.08	1.16	0.11	2.22	52	0	122	79	80	95	0	106
13	2023-05-30T06:43:33.825622699Z	32.7	43.4	1.38	0.84	0.88	1.45	1.08	1.16	0.11	2.22	52	0	122	79	80	95	0	106
13	2023-05-30T06:43:36.897982732Z	32.8	43.5	1.38	0.84	0.88	1.44	1.07	1.15	0.11	2.22	52	0	122	79	80	95	0	106
13	2023-05-30T06:43:39.944489283Z	32.7	43.3	1.38	0.84	0.88	1.44	1.07	1.15	0.11	2.22	52	0	122	79	80	95	0	106
13	2023-05-30T06:43:43.133505485Z	32.8	43.4	1.38	0.84	0.88	1.44	1.07	1.15	0.11	2.22	52	0	122	79	80	95	0	106
13	2023-05-30T06:43:45.682389245Z	32.7	43.4	1.38	0.84	0.88	1.44	1.07	1.15	0.11	2.22	52	0	122	79	80	95	0	106
13	2023-05-30T06:43:48.24056967Z	32.7	43.4	1.38	0.84	0.88	1.44	1.07	1.15	0.11	2.22	52	0	122	79	80	95	0	106
13	2023-05-30T06:43:51.335403236Z	32.7	43.5	1.38	0.84	0.88	1.44	1.07	1.15	0.11	2.23	52	0	122	79	80	95	0	106
13	2023-05-30T06:43:54.713363309Z	32.7	43.7	1.38	0.84	0.88	1.44	1.07	1.15	0.11	2.23	52	0	122	79	80	95	0	106
13	2023-05-30T06:43:57.360775298Z	32.7	43.8	1.38	0.84	0.88	1.44	1.07	1.15	0.11	2.23	52	0	122	79	80	95	0	106
13	2023-05-30T06:44:00.300811838Z	32.7	44.1	1.38	0.84	0.88	1.44	1.07	1.15	0.11	2.23	52	0	122	79	80	95	0	106
13	2023-05-30T06:44:03.310581203Z	32.7	44.1	1.38	0.84	0.88	1.44	1.07	1.15	0.11	2.23	52	0	122	79	80	95	0	106
13	2023-05-30T06:44:06.567296055Z	32.7	44.1	1.37	0.84	0.88	1.44	1.06	1.15	0.11	2.22	52	0	122	79	80	95	0	106
13	2023-05-30T06:44:09.24871963Z	32.7	44.1	1.37	0.84	0.88	1.43	1.06	1.15	0.11	2.22	52	0	122	79	80	95	0	106
13	2023-05-30T06:44:12.326585248Z	32.7	44	1.37	0.84	0.88	1.43	1.06	1.15	0.11	2.22	52	0	122	79	80	95	0	106
13	2023-05-30T06:44:15.598925638Z	32.7	43.9	1.37	0.84	0.88	1.43	1.06	1.15	0.11	2.22	52	0	122	79	80	95	0	106
13	2023-05-30T06:44:19.015632927Z	32.6	43.8	1.37	0.84	0.88	1.43	1.06	1.15	0.11	2.22	52	0	122	79	80	95	0	106
13	2023-05-30T06:44:22.556948543Z	32.7	43.9	1.37	0.83	0.88	1.44	1.06	1.15	0.11	2.23	52	0	122	79	80	95	0	106
13	2023-05-30T06:44:25.413602954Z	32.7	43.9	1.37	0.83	0.88	1.43	1.06	1.15	0.11	2.23	52	0	122	79	80	95	0	106
13	2023-05-30T06:44:28.283050851Z	32.6	43.9	1.37	0.83	0.88	1.43	1.06	1.15	0.11	2.24	52	0	122	79	80	95	0	106
13	2023-05-30T06:44:30.950440407Z	32.6	44	1.37	0.83	0.88	1.43	1.06	1.15	0.11	2.23	52	0	122	79	80	95	0	106
13	2023-05-30T06:44:34.443330401Z	32.6	43.9	1.35	0.83	0.88	1.44	1.06	1.15	0.11	2.23	52	0	122	79	80	95	0	106
13	2023-05-30T06:44:37.514960271Z	32.6	44	1.37	0.83	0.88	1.44	1.06	1.15	0.11	2.24	52	0	122	79	80	95	0	106
13	2023-05-30T06:44:40.363774978Z	32.6	44.1	1.37	0.83	0.88	1.45	1.06	1.15	0.11	2.23	52	0	122	79	80	95	0	106
13	2023-05-30T06:44:43.645081108Z	32.6	44.1	1.37	0.83	0.88	1.44	1.06	1.15	0.11	2.22	52	0	122	79	80	95	0	106
13	2023-05-30T06:44:46.520131773Z	32.6	43.9	1.37	0.83	0.88	1.44	1.06	1.15	0.11	2.23	52	0	122	79	80	95	0	106
13	2023-05-30T06:44:49.183465151Z	32.6	43.9	1.37	0.83	0.88	1.43	1.06	1.15	0.11	2.23	52	0	122	79	80	95	0	106
13	2023-05-30T06:44:52.244460274Z	32.6	43.8	1.36	0.83	0.88	1.43	1.06	1.15	0.11	2.23	52	0	122	79	80	95	0	106
13	2023-05-30T06:44:55.732494073Z	32.6	43.7	1.37	0.83	0.88	1.43	1.06	1.15	0.11	2.23	52	0	122	79	80	95	0	106
13	2023-05-30T06:44:59.000937465Z	32.6	43.7	1.37	0.83	0.88	1.43	1.06	1.15	0.11	2.24	52	0	122	79	80	95	0	106
13	2023-05-30T06:45:01.665305017Z	32.6	43.8	1.37	0.83	0.88	1.42	1.06	1.15	0.11	2.24	52	0	122	79	80	95	0	106
13	2023-05-30T06:45:06.994646069Z	32.6	43.8	1.37	0.83	0.88	1.43	1.06	1.15	0.11	2.23	52	0	122	79	80	95	0	106
13	2023-05-30T06:45:09.972760867Z	32.7	44	1.37	0.83	0.88	1.43	1.06	1.15	0.11	2.23	52	0	122	79	80	95	0	106
13	2023-05-30T06:45:12.726081205Z	32.7	43.8	1.37	0.83	0.88	1.43	1.06	1.15	0.11	2.22	52	0	122	79	80	95	0	106
13	2023-05-30T06:45:15.997173819Z	32.7	43.8	1.37	0.82	0.88	1.42	1.06	1.15	0.11	2.23	52	0	122	79	80	95	0	106
13	2023-05-30T06:45:19.288578998Z	32.7	43.5	1.37	0.82	0.88	1.42	1.06	1.15	0.11	2.23	52	0	122	79	80	95	0	106
13	2023-05-30T06:45:23.189212229Z	32.7	43.6	1.37	0.82	0.88	1.42	1.06	1.15	0.11	2.23	52	0	122	79	80	95	0	106
13	2023-05-30T06:45:25.628946168Z	32.7	43.6	1.37	0.82	0.88	1.42	1.06	1.15	0.11	2.23	52	0	122	79	80	95	0	106
13	2023-05-30T06:45:28.300295724Z	32.7	43.8	1.37	0.82	0.87	1.42	1.05	1.15	0.11	2.23	52	0	122	79	80	95	0	106
13	2023-05-30T06:45:31.164166769Z	32.7	43.7	1.37	0.82	0.87	1.42	1.05	1.15	0.11	2.23	52	0	122	79	80	95	0	106
13	2023-05-30T06:45:33.6128419Z	32.7	43.6	1.36	0.82	0.87	1.41	1.05	1.15	0.11	2.23	52	0	122	79	80	95	0	106
13	2023-05-30T06:45:37.096010662Z	32.7	43.4	1.37	0.82	0.87	1.42	1.05	1.15	0.11	2.23	52	0	122	79	80	95	0	106
13	2023-05-30T06:45:39.754870805Z	32.7	43.4	1.36	0.82	0.87	1.42	1.05	1.15	0.11	2.23	52	0	122	79	80	95	0	106
13	2023-05-30T06:45:42.839796121Z	32.7	43.3	1.36	0.82	0.87	1.42	1.05	1.15	0.11	2.23	52	0	122	79	80	95	0	106
13	2023-05-30T06:45:45.707264937Z	32.7	43.5	1.36	0.82	0.87	1.42	1.05	1.15	0.11	2.23	52	0	122	79	80	95	0	106
13	2023-05-30T06:45:48.770952386Z	32.8	43.5	1.36	0.82	0.88	1.42	1.05	1.15	0.11	2.23	52	0	122	79	80	95	0	106
13	2023-05-30T06:45:52.46675643Z	32.8	43.5	1.36	0.82	0.88	1.41	1.05	1.15	0.11	2.23	52	0	122	79	80	95	0	106
13	2023-05-30T06:45:56.966694202Z	32.8	43.4	1.36	0.82	0.88	1.41	1.05	1.15	0.11	2.24	52	0	122	79	80	95	0	106
13	2023-05-30T06:46:00.263255196Z	32.8	43.5	1.36	0.82	0.88	1.42	1.05	1.15	0.11	2.24	52	0	122	79	80	95	0	106
13	2023-05-30T06:46:03.522588656Z	32.8	43.7	1.36	0.81	0.88	1.42	1.05	1.15	0.11	2.24	52	0	122	79	80	95	0	106
13	2023-05-30T06:46:06.390294838Z	32.8	43.8	1.36	0.81	0.88	1.42	1.05	1.15	0.1	2.23	52	0	122	79	80	95	0	106
13	2023-05-30T06:46:09.871795422Z	32.8	43.6	1.36	0.81	0.88	1.42	1.05	1.15	0.11	2.23	52	0	122	79	80	95	0	106
13	2023-05-30T06:46:13.464798887Z	32.8	43.5	1.36	0.81	0.88	1.42	1.05	1.15	0.11	2.23	52	0	122	79	80	95	0	106
13	2023-05-30T06:46:16.701819171Z	32.8	43.5	1.36	0.81	0.87	1.42	1.04	1.14	0.11	2.22	52	0	122	79	80	95	0	106
13	2023-05-30T06:46:19.70433294Z	32.8	43.5	1.36	0.81	0.87	1.42	1.04	1.14	0.11	2.23	52	0	122	79	80	95	0	106
13	2023-05-30T06:46:22.77328772Z	32.8	43.2	1.37	0.81	0.88	1.43	1.04	1.15	0.11	2.23	52	0	122	79	80	95	0	106
13	2023-05-30T06:46:26.439298785Z	32.8	43.4	1.36	0.81	0.88	1.43	1.04	1.15	0.11	2.23	52	0	122	79	80	95	0	106
13	2023-05-30T06:46:29.556256759Z	32.8	43.6	1.36	0.81	0.88	1.43	1.05	1.15	0.11	2.24	52	0	122	79	80	95	0	106
13	2023-05-30T06:46:33.364002738Z	32.8	43.6	1.37	0.81	0.88	1.43	1.05	1.15	0.11	2.23	52	0	122	79	80	95	0	106
13	2023-05-30T06:46:36.285018772Z	32.8	43.5	1.36	0.81	0.88	1.42	1.05	1.15	0.11	2.23	52	0	122	79	80	95	0	106
13	2023-05-30T06:46:39.172290926Z	32.8	43.6	1.36	0.81	0.88	1.42	1.04	1.15	0.1	2.24	52	0	122	79	80	95	0	106
13	2023-05-30T06:46:42.019235231Z	32.8	43.9	1.36	0.81	0.88	1.43	1.05	1.15	0.11	2.24	52	0	122	79	80	95	0	106
13	2023-05-30T06:46:44.892949194Z	32.8	44	1.36	0.81	0.88	1.43	1.05	1.15	0.11	2.24	52	0	122	79	80	95	0	106
13	2023-05-30T06:46:48.392014286Z	32.8	44	1.37	0.81	0.88	1.43	1.05	1.15	0.11	2.24	52	0	122	79	80	95	0	106
13	2023-05-30T06:46:51.442621716Z	32.7	43.9	1.36	0.81	0.88	1.43	1.05	1.15	0.11	2.23	52	0	122	79	80	95	0	106
13	2023-05-30T06:46:54.296059374Z	32.7	44.1	1.37	0.81	0.88	1.43	1.04	1.15	0.11	2.23	52	0	122	79	80	95	0	106
13	2023-05-30T06:46:57.171360579Z	32.7	43.9	1.36	0.81	0.88	1.43	1.04	1.15	0.11	2.24	52	0	122	79	80	95	0	106
13	2023-05-30T06:47:01.679687456Z	32.8	43.9	1.36	0.81	0.88	1.43	1.04	1.15	0.11	2.23	52	0	122	79	80	95	0	106
13	2023-05-30T06:47:04.173499362Z	32.8	43.7	1.36	0.81	0.88	1.43	1.04	1.15	0.11	2.23	52	0	122	79	80	95	0	106
13	2023-05-30T06:47:07.49065407Z	32.8	43.6	1.36	0.81	0.88	1.42	1.04	1.15	0.11	2.23	52	0	122	79	80	95	0	106
13	2023-05-30T06:47:10.496147351Z	32.7	43.4	1.36	0.81	0.88	1.42	1.04	1.15	0.11	2.24	52	0	122	79	80	95	0	106
13	2023-05-30T06:47:13.788497035Z	32.8	43.5	1.36	0.8	0.88	1.42	1.04	1.15	0.11	2.24	52	0	122	79	80	95	0	106
14	2023-05-30T06:47:17.053721264Z	32.8	43.6	1.36	0.8	0.88	1.42	1.04	1.15	0.11	2.24	65	0	143	80	62	98	1	156	Burning feet, Pain
14	2023-05-30T06:47:20.135666729Z	32.8	43.6	1.36	0.8	0.88	1.42	1.04	1.15	0.11	2.23	65	0	143	80	62	98	1	156	Burning feet, Pain
14	2023-05-30T06:47:23.006543014Z	32.8	43.5	1.36	0.8	0.88	1.42	1.04	1.15	0.11	2.24	65	0	143	80	62	98	1	156	Burning feet, Pain
14	2023-05-30T06:47:25.898806332Z	32.8	43.6	1.36	0.8	0.88	1.42	1.04	1.15	0.11	2.24	65	0	143	80	62	98	1	156	Burning feet, Pain
14	2023-05-30T06:47:29.382975087Z	32.8	43.8	1.36	0.8	0.88	1.42	1.04	1.15	0.11	2.24	65	0	143	80	62	98	1	156	Burning feet, Pain
14	2023-05-30T06:47:32.620059091Z	32.8	43.9	1.36	0.8	0.88	1.43	1.04	1.15	0.11	2.24	65	0	143	80	62	98	1	156	Burning feet, Pain
14	2023-05-30T06:47:36.981195064Z	32.8	43.9	1.36	0.8	0.88	1.43	1.04	1.15	0.11	2.23	65	0	143	80	62	98	1	156	Burning feet, Pain
14	2023-05-30T06:47:40.613471924Z	32.8	43.8	1.37	0.8	0.88	1.42	1.04	1.15	0.11	2.24	65	0	143	80	62	98	1	156	Burning feet, Pain
14	2023-05-30T06:47:44.68892449Z	32.8	43.8	1.37	0.8	0.88	1.42	1.04	1.15	0.11	2.23	65	0	143	80	62	98	1	156	Burning feet, Pain
14	2023-05-30T06:47:47.96947596Z	32.8	43.7	1.37	0.8	0.88	1.42	1.04	1.15	0.11	2.23	65	0	143	80	62	98	1	156	Burning feet, Pain
14	2023-05-30T06:47:50.618950122Z	32.9	43.6	1.36	0.8	0.88	1.42	1.04	1.15	0.11	2.24	65	0	143	80	62	98	1	156	Burning feet, Pain
14	2023-05-30T06:47:56.40928436Z	32.8	43.4	1.36	0.8	0.88	1.42	1.04	1.15	0.1	2.24	65	0	143	80	62	98	1	156	Burning feet, Pain
14	2023-05-30T06:48:07.466645402Z	32.8	43.7	1.37	0.8	0.88	1.42	1.04	1.15	0.11	2.24	65	0	143	80	62	98	1	156	Burning feet, Pain
14	2023-05-30T06:48:09.897977982Z	32.8	43.7	1.37	0.8	0.88	1.42	1.04	1.15	0.11	2.24	65	0	143	80	62	98	1	156	Burning feet, Pain
14	2023-05-30T06:48:13.401164736Z	32.8	43.4	1.37	0.8	0.88	1.42	1.04	1.15	0.11	2.24	65	0	143	80	62	98	1	156	Burning feet, Pain
14	2023-05-30T06:48:16.888637466Z	32.8	43.5	1.36	0.8	0.88	1.42	1.04	1.15	0.11	2.23	65	0	143	80	62	98	1	156	Burning feet, Pain
14	2023-05-30T06:48:19.291304759Z	32.8	43.5	1.36	0.8	0.88	1.42	1.04	1.15	0.11	2.23	65	0	143	80	62	98	1	156	Burning feet, Pain
14	2023-05-30T06:48:25.854202286Z	32.8	43.6	1.35	0.8	0.88	1.42	1.04	1.15	0.11	2.23	65	0	143	80	62	98	1	156	Burning feet, Pain
14	2023-05-30T06:48:29.33440191Z	32.8	43.4	1.36	0.79	0.88	1.42	1.04	1.15	0.11	2.23	65	0	143	80	62	98	1	156	Burning feet, Pain
14	2023-05-30T06:48:32.627838548Z	32.8	43.5	1.36	0.79	0.88	1.41	1.04	1.15	0.11	2.23	65	0	143	80	62	98	1	156	Burning feet, Pain
14	2023-05-30T06:48:35.689393574Z	32.8	43.4	1.36	0.79	0.88	1.41	1.04	1.15	0.11	2.23	65	0	143	80	62	98	1	156	Burning feet, Pain
14	2023-05-30T06:48:39.160849353Z	32.8	43.5	1.36	0.79	0.88	1.41	1.04	1.15	0.11	2.23	65	0	143	80	62	98	1	156	Burning feet, Pain
14	2023-05-30T06:48:42.454440613Z	32.8	43.5	1.36	0.79	0.88	1.42	1.03	1.15	0.11	2.24	65	0	143	80	62	98	1	156	Burning feet, Pain
14	2023-05-30T06:48:46.336888582Z	32.8	43.6	1.36	0.79	0.88	1.42	1.03	1.15	0.11	2.23	65	0	143	80	62	98	1	156	Burning feet, Pain
14	2023-05-30T06:48:49.812063619Z	32.8	43.6	1.36	0.79	0.88	1.41	1.03	1.15	0.11	2.23	65	0	143	80	62	98	1	156	Burning feet, Pain
14	2023-05-30T06:48:52.911700918Z	32.8	43.8	1.36	0.79	0.88	1.41	1.03	1.15	0.11	2.24	65	0	143	80	62	98	1	156	Burning feet, Pain
14	2023-05-30T06:48:56.160117662Z	32.8	43.6	1.36	0.79	0.88	1.41	1.03	1.15	0.11	2.24	65	0	143	80	62	98	1	156	Burning feet, Pain
14	2023-05-30T06:48:59.045361867Z	32.8	43.8	1.36	0.79	0.88	1.41	1.03	1.15	0.11	2.24	65	0	143	80	62	98	1	156	Burning feet, Pain
14	2023-05-30T06:49:02.095816324Z	32.8	43.6	1.36	0.79	0.88	1.41	1.03	1.15	0.11	2.23	65	0	143	80	62	98	1	156	Burning feet, Pain
14	2023-05-30T06:49:04.551232185Z	32.8	43.6	1.36	0.79	0.88	1.41	1.03	1.15	0.11	2.23	65	0	143	80	62	98	1	156	Burning feet, Pain
14	2023-05-30T06:49:07.636130891Z	32.8	43.6	1.36	0.79	0.88	1.41	1.03	1.15	0.11	2.23	65	0	143	80	62	98	1	156	Burning feet, Pain
14	2023-05-30T06:49:10.497629683Z	32.8	43.5	1.36	0.79	0.88	1.41	1.03	1.15	0.11	2.23	65	0	143	80	62	98	1	156	Burning feet, Pain
14	2023-05-30T06:49:13.320500164Z	32.7	43.5	1.36	0.79	0.88	1.41	1.03	1.15	0.11	2.24	65	0	143	80	62	98	1	156	Burning feet, Pain
14	2023-05-30T06:49:16.429804441Z	32.8	43.7	1.36	0.79	0.88	1.41	1.03	1.15	0.11	2.23	65	0	143	80	62	98	1	156	Burning feet, Pain
14	2023-05-30T06:49:20.112441607Z	32.8	43.6	1.36	0.79	0.88	1.41	1.03	1.15	0.11	2.23	65	0	143	80	62	98	1	156	Burning feet, Pain
14	2023-05-30T06:49:25.512018138Z	32.8	43.5	1.36	0.79	0.88	1.41	1.03	1.15	0.11	2.23	65	0	143	80	62	98	1	156	Burning feet, Pain
14	2023-05-30T06:49:29.955951648Z	32.8	43.5	1.36	0.79	0.88	1.41	1.04	1.15	0.11	2.23	65	0	143	80	62	98	1	156	Burning feet, Pain
14	2023-05-30T06:49:33.021242806Z	32.7	43.6	1.36	0.79	0.88	1.41	1.03	1.15	0.11	2.23	65	0	143	80	62	98	1	156	Burning feet, Pain
14	2023-05-30T06:49:36.501517824Z	32.7	43.7	1.36	0.79	0.88	1.41	1.03	1.15	0.11	2.23	65	0	143	80	62	98	1	156	Burning feet, Pain
14	2023-05-30T06:49:39.397362774Z	32.7	43.6	1.37	0.79	0.88	1.41	1.03	1.15	0.11	2.23	65	0	143	80	62	98	1	156	Burning feet, Pain
14	2023-05-30T06:49:41.863840143Z	32.7	43.7	1.36	0.79	0.88	1.41	1.03	1.15	0.11	2.23	65	0	143	80	62	98	1	156	Burning feet, Pain
14	2023-05-30T06:49:45.369186827Z	32.7	43.7	1.36	0.78	0.88	1.41	1.03	1.15	0.11	2.24	65	0	143	80	62	98	1	156	Burning feet, Pain
14	2023-05-30T06:49:47.974128684Z	32.7	43.8	1.37	0.79	0.88	1.41	1.04	1.15	0.11	2.23	65	0	143	80	62	98	1	156	Burning feet, Pain
14	2023-05-30T06:49:51.270562079Z	32.7	43.7	1.37	0.78	0.87	1.41	1.03	1.15	0.11	2.23	65	0	143	80	62	98	1	156	Burning feet, Pain
14	2023-05-30T06:49:53.734634074Z	32.7	43.6	1.36	0.79	0.87	1.41	1.03	1.15	0.11	2.23	65	0	143	80	62	98	1	156	Burning feet, Pain
14	2023-05-30T06:49:56.180988165Z	32.7	43.7	1.36	0.78	0.87	1.4	1.03	1.15	0.11	2.24	65	0	143	80	62	98	1	156	Burning feet, Pain
14	2023-05-30T06:49:58.626727526Z	32.7	43.8	1.36	0.78	0.88	1.41	1.03	1.15	0.11	2.23	65	0	143	80	62	98	1	156	Burning feet, Pain
14	2023-05-30T06:50:01.569032233Z	32.7	43.7	1.36	0.78	0.88	1.41	1.03	1.15	0.11	2.23	65	0	143	80	62	98	1	156	Burning feet, Pain
14	2023-05-30T06:50:05.804567795Z	32.7	43.8	1.36	0.78	0.88	1.41	1.03	1.15	0.11	2.23	65	0	143	80	62	98	1	156	Burning feet, Pain
14	2023-05-30T06:50:09.499008966Z	32.6	43.6	1.36	0.78	0.88	1.41	1.03	1.15	0.1	2.25	65	0	143	80	62	98	1	156	Burning feet, Pain
14	2023-05-30T06:50:14.776331525Z	32.6	43.8	1.37	0.78	0.88	1.41	1.03	1.15	0.11	2.24	65	0	143	80	62	98	1	156	Burning feet, Pain
14	2023-05-30T06:50:20.344289226Z	32.6	43.8	1.36	0.78	0.88	1.41	1.03	1.15	0.11	2.24	65	0	143	80	62	98	1	156	Burning feet, Pain
14	2023-05-30T06:50:23.822832313Z	32.6	43.5	1.36	0.78	0.88	1.41	1.03	1.15	0.11	2.24	65	0	143	80	62	98	1	156	Burning feet, Pain
14	2023-05-30T06:50:27.093011853Z	32.6	43.7	1.36	0.78	0.88	1.41	1.03	1.15	0.11	2.24	65	0	143	80	62	98	1	156	Burning feet, Pain
14	2023-05-30T06:50:29.969951864Z	32.6	43.9	1.36	0.78	0.88	1.41	1.03	1.15	0.11	2.24	65	0	143	80	62	98	1	156	Burning feet, Pain
14	2023-05-30T06:50:33.867502948Z	32.6	44.2	1.36	0.78	0.88	1.41	1.04	1.15	0.11	2.25	65	0	143	80	62	98	1	156	Burning feet, Pain
14	2023-05-30T06:50:36.92988474Z	32.6	44.5	1.39	0.78	0.89	1.42	1.06	1.17	0.11	2.28	65	0	143	80	62	98	1	156	Burning feet, Pain
14	2023-05-30T06:50:40.820904462Z	32.6	45.8	1.88	0.81	0.94	1.49	1.48	1.59	0.11	2.54	65	0	143	80	62	98	1	156	Burning feet, Pain
14	2023-05-30T06:50:45.543495213Z	32.7	48.4	2.17	0.88	1.17	1.72	1.81	1.85	0.11	2.7	65	0	143	80	62	98	1	156	Burning feet, Pain
14	2023-05-30T06:50:49.457231047Z	32.7	49.9	2.56	1	1.77	2.24	2.31	2.24	0.11	2.99	65	0	143	80	62	98	1	156	Burning feet, Pain
14	2023-05-30T06:50:53.720629055Z	32.7	53	2.72	1.05	2.02	2.44	2.49	2.39	0.11	3.1	65	0	143	80	62	98	1	156	Burning feet, Pain
14	2023-05-30T06:50:57.284554562Z	32.7	54.3	2.85	1.1	2.24	2.61	2.65	2.53	0.11	3.22	65	0	143	80	62	98	1	156	Burning feet, Pain
14	2023-05-30T06:51:00.292708243Z	32.7	56.1	2.95	1.15	2.4	2.75	2.76	2.64	0.11	3.31	65	0	143	80	62	98	1	156	Burning feet, Pain
14	2023-05-30T06:51:04.623808536Z	32.7	57.6	2.98	1.17	2.5	2.84	2.77	2.68	0.11	3.34	65	0	143	80	62	98	1	156	Burning feet, Pain
14	2023-05-30T06:51:07.659098299Z	32.7	57.5	2.97	1.17	2.53	2.88	2.74	2.66	0.11	3.34	65	0	143	80	62	98	1	156	Burning feet, Pain
14	2023-05-30T06:51:10.948894383Z	32.7	57.5	2.98	1.17	2.56	2.93	2.74	2.68	0.11	3.36	65	0	143	80	62	98	1	156	Burning feet, Pain
14	2023-05-30T06:51:14.641753014Z	32.7	57.6	2.98	1.17	2.57	2.95	2.74	2.69	0.11	3.37	65	0	143	80	62	98	1	156	Burning feet, Pain
14	2023-05-30T06:51:18.125323167Z	32.7	57.9	2.98	1.17	2.58	2.97	2.74	2.69	0.11	3.37	65	0	143	80	62	98	1	156	Burning feet, Pain
14	2023-05-30T06:51:20.918027081Z	32.7	58.2	2.98	1.17	2.57	2.98	2.73	2.68	0.11	3.37	65	0	143	80	62	98	1	156	Burning feet, Pain
14	2023-05-30T06:51:24.223642022Z	32.7	58.6	2.97	1.16	2.55	2.98	2.71	2.66	0.11	3.36	65	0	143	80	62	98	1	156	Burning feet, Pain
14	2023-05-30T06:51:26.905912489Z	32.7	58.8	2.97	1.17	2.55	2.99	2.71	2.67	0.11	3.37	65	0	143	80	62	98	1	156	Burning feet, Pain
14	2023-05-30T06:51:29.652056884Z	32.7	59.1	2.96	1.17	2.55	2.99	2.71	2.66	0.11	3.37	65	0	143	80	62	98	1	156	Burning feet, Pain
14	2023-05-30T06:51:32.250236556Z	32.8	59.4	2.95	1.16	2.54	2.99	2.7	2.65	0.11	3.37	65	0	143	80	62	98	1	156	Burning feet, Pain
14	2023-05-30T06:51:35.58707721Z	32.8	59.7	2.94	1.16	2.53	2.99	2.69	2.64	0.11	3.36	65	0	143	80	62	98	1	156	Burning feet, Pain
14	2023-05-30T06:51:38.37861861Z	32.8	59.8	2.93	1.16	2.52	2.99	2.68	2.63	0.11	3.35	65	0	143	80	62	98	1	156	Burning feet, Pain
14	2023-05-30T06:51:41.024248665Z	32.8	60.1	2.92	1.15	2.51	2.99	2.66	2.62	0.11	3.35	65	0	143	80	62	98	1	156	Burning feet, Pain
14	2023-05-30T06:51:44.515713294Z	32.8	60.3	2.92	1.15	2.5	2.99	2.65	2.61	0.11	3.35	65	0	143	80	62	98	1	156	Burning feet, Pain
14	2023-05-30T06:51:47.432949886Z	32.8	60.6	2.9	1.14	2.49	2.99	2.64	2.6	0.11	3.34	65	0	143	80	62	98	1	156	Burning feet, Pain
14	2023-05-30T06:51:53.755693606Z	32.9	60.9	2.89	1.14	2.48	2.98	2.63	2.58	0.11	3.33	65	0	143	80	62	98	1	156	Burning feet, Pain
14	2023-05-30T06:51:57.033768189Z	32.9	61.2	2.88	1.13	2.46	2.98	2.61	2.57	0.11	3.32	65	0	143	80	62	98	1	156	Burning feet, Pain
14	2023-05-30T06:52:01.541150287Z	32.9	61.6	2.86	1.13	2.45	2.97	2.59	2.55	0.11	3.31	65	0	143	80	62	98	1	156	Burning feet, Pain
14	2023-05-30T06:52:05.939937793Z	32.9	61.9	2.85	1.12	2.43	2.97	2.58	2.54	0.11	3.3	65	0	143	80	62	98	1	156	Burning feet, Pain
14	2023-05-30T06:52:08.711951487Z	32.9	62.1	2.84	1.11	2.42	2.97	2.56	2.53	0.11	3.29	65	0	143	80	62	98	1	156	Burning feet, Pain
14	2023-05-30T06:52:12.589084966Z	33	62.5	2.83	1.11	2.41	2.96	2.55	2.52	0.11	3.28	65	0	143	80	62	98	1	156	Burning feet, Pain
14	2023-05-30T06:52:16.249578416Z	33	62.7	2.81	1.1	2.4	2.96	2.53	2.5	0.11	3.27	65	0	143	80	62	98	1	156	Burning feet, Pain
14	2023-05-30T06:52:19.138575006Z	33.1	63.1	2.8	1.09	2.39	2.96	2.52	2.49	0.11	3.27	65	0	143	80	62	98	1	156	Burning feet, Pain
14	2023-05-30T06:52:21.588730873Z	33.1	63.3	2.8	1.09	2.38	2.95	2.51	2.49	0.11	3.26	65	0	143	80	62	98	1	156	Burning feet, Pain
14	2023-05-30T06:52:24.87753019Z	33	63.4	2.79	1.09	2.37	2.95	2.5	2.48	0.11	3.26	65	0	143	80	62	98	1	156	Burning feet, Pain
14	2023-05-30T06:52:27.509063577Z	33	63.6	2.78	1.08	2.36	2.95	2.49	2.47	0.11	3.25	65	0	143	80	62	98	1	156	Burning feet, Pain
14	2023-05-30T06:52:30.386389149Z	33.1	63.9	2.77	1.08	2.35	2.94	2.48	2.46	0.11	3.24	65	0	143	80	62	98	1	156	Burning feet, Pain
14	2023-05-30T06:52:33.235147578Z	33.1	64	2.76	1.07	2.34	2.94	2.47	2.45	0.11	3.24	65	0	143	80	62	98	1	156	Burning feet, Pain
14	2023-05-30T06:52:35.73582346Z	33.1	64.2	2.75	1.07	2.33	2.94	2.46	2.44	0.11	3.23	65	0	143	80	62	98	1	156	Burning feet, Pain
14	2023-05-30T06:52:38.378217563Z	33.1	64.4	2.74	1.07	2.32	2.93	2.45	2.43	0.11	3.23	65	0	143	80	62	98	1	156	Burning feet, Pain
14	2023-05-30T06:52:41.464790887Z	33.1	64.5	2.73	1.06	2.31	2.93	2.42	2.42	0.11	3.19	65	0	143	80	62	98	1	156	Burning feet, Pain
14	2023-05-30T06:52:44.301967247Z	33.2	64.3	2.68	1.01	2.24	2.88	2.33	2.35	0.11	3.08	65	0	143	80	62	98	1	156	Burning feet, Pain
14	2023-05-30T06:52:47.601082511Z	33.2	60.6	2.59	0.99	2.13	2.79	2.19	2.23	0.11	2.94	65	0	143	80	62	98	1	156	Burning feet, Pain
14	2023-05-30T06:52:50.866676951Z	33.2	57.5	2.44	0.96	1.98	2.67	2.06	2.08	0.11	2.78	65	0	143	80	62	98	1	156	Burning feet, Pain
14	2023-05-30T06:52:53.525441595Z	33.2	53.8	2.31	0.93	1.84	2.55	1.94	1.97	0.11	2.72	65	0	143	80	62	98	1	156	Burning feet, Pain
14	2023-05-30T06:52:56.082491456Z	33.2	51.5	2.22	0.91	1.66	2.46	1.82	1.87	0.11	2.66	65	0	143	80	62	98	1	156	Burning feet, Pain
14	2023-05-30T06:52:58.915568016Z	33.2	49.7	2.14	0.9	1.49	2.37	1.73	1.79	0.11	2.61	65	0	143	80	62	98	1	156	Burning feet, Pain
14	2023-05-30T06:53:01.741258768Z	33.2	48.3	2.07	0.89	1.41	2.29	1.67	1.73	0.11	2.57	65	0	143	80	62	98	1	156	Burning feet, Pain
14	2023-05-30T06:53:04.414509939Z	33.2	47.4	2	0.87	1.29	2.22	1.6	1.66	0.11	2.53	65	0	143	80	62	98	1	156	Burning feet, Pain
14	2023-05-30T06:53:07.470289013Z	33.2	46.9	1.94	0.86	1.22	2.15	1.55	1.6	0.11	2.49	65	0	143	80	62	98	1	156	Burning feet, Pain
14	2023-05-30T06:53:10.514574443Z	33.1	46.3	1.87	0.85	1.17	2.08	1.5	1.55	0.11	2.47	65	0	143	80	62	98	1	156	Burning feet, Pain
14	2023-05-30T06:53:14.858404235Z	33.1	46.1	1.82	0.85	1.12	2.03	1.46	1.51	0.11	2.44	65	0	143	80	62	98	1	156	Burning feet, Pain
14	2023-05-30T06:53:18.108554999Z	33.1	45.8	1.76	0.84	1.07	1.94	1.41	1.46	0.11	2.42	65	0	143	80	62	98	1	156	Burning feet, Pain
14	2023-05-30T06:53:20.765363689Z	33.1	45.5	1.72	0.83	1.03	1.89	1.38	1.42	0.11	2.4	65	0	143	80	62	98	1	156	Burning feet, Pain
14	2023-05-30T06:53:23.860301706Z	33.1	45.1	1.69	0.83	1.01	1.85	1.35	1.4	0.11	2.39	65	0	143	80	62	98	1	156	Burning feet, Pain
14	2023-05-30T06:53:26.340248183Z	33.1	44.9	1.67	0.82	0.99	1.81	1.33	1.38	0.11	2.37	65	0	143	80	62	98	1	156	Burning feet, Pain
14	2023-05-30T06:53:29.542237934Z	33.1	44.6	1.64	0.82	0.97	1.86	1.22	1.33	0.11	2.23	65	0	143	80	62	98	1	156	Burning feet, Pain
14	2023-05-30T06:53:33.262267048Z	33.1	44.4	1.63	0.8	0.95	1.89	1.23	1.38	0.11	2.3	65	0	143	80	62	98	1	156	Burning feet, Pain
14	2023-05-30T06:53:35.918768098Z	33.1	44.2	1.61	0.79	0.95	1.82	1.26	1.38	0.11	2.35	65	0	143	80	62	98	1	156	Burning feet, Pain
14	2023-05-30T06:53:38.380630144Z	33	44.1	1.6	0.78	0.94	1.77	1.26	1.37	0.11	2.36	65	0	143	80	62	98	1	156	Burning feet, Pain
14	2023-05-30T06:53:41.241528898Z	33	44	1.58	0.78	0.92	1.79	1.21	1.33	0.11	2.25	65	0	143	80	62	98	1	156	Burning feet, Pain
14	2023-05-30T06:53:44.560163839Z	32.9	43.8	1.58	0.77	0.91	1.84	1.15	1.32	0.11	2.26	65	0	143	80	62	98	1	156	Burning feet, Pain
14	2023-05-30T06:53:47.643159393Z	32.8	44.1	1.57	0.76	0.89	1.88	1.18	1.39	0.11	2.32	65	0	143	80	62	98	1	156	Burning feet, Pain
14	2023-05-30T06:53:50.665072977Z	32.7	44.2	1.57	0.75	0.9	1.8	1.23	1.4	0.11	2.37	65	0	143	80	62	98	1	156	Burning feet, Pain
14	2023-05-30T06:53:53.765563046Z	32.7	44.1	1.56	0.74	0.9	1.75	1.24	1.38	0.11	2.38	65	0	143	80	62	98	1	156	Burning feet, Pain
14	2023-05-30T06:53:57.024321899Z	32.7	44.1	1.55	0.73	0.89	1.71	1.24	1.36	0.11	2.37	65	0	143	80	62	98	1	156	Burning feet, Pain
14	2023-05-30T06:53:59.96800313Z	32.7	44.3	1.55	0.73	0.9	1.76	1.15	1.29	0.11	2.28	65	0	143	80	62	98	1	156	Burning feet, Pain
14	2023-05-30T06:54:02.846475396Z	32.6	44.5	1.55	0.72	0.87	1.82	1.12	1.34	0.11	2.28	65	0	143	80	62	98	1	156	Burning feet, Pain
14	2023-05-30T06:54:05.632330405Z	32.6	44.6	1.55	0.72	0.89	1.81	1.19	1.41	0.11	2.36	65	0	143	80	62	98	1	156	Burning feet, Pain
14	2023-05-30T06:54:08.518926526Z	32.6	44.7	1.55	0.71	0.89	1.75	1.21	1.4	0.11	2.37	65	0	143	80	62	98	1	156	Burning feet, Pain
14	2023-05-30T06:54:11.967275572Z	32.5	44.7	1.54	0.71	0.88	1.69	1.22	1.38	0.11	2.37	65	0	143	80	62	98	1	156	Burning feet, Pain
14	2023-05-30T06:54:15.244787333Z	32.5	44.6	1.53	0.71	0.87	1.65	1.22	1.36	0.11	2.36	65	0	143	80	62	98	1	156	Burning feet, Pain
14	2023-05-30T06:54:18.116055146Z	32.5	44.5	1.53	0.7	0.86	1.62	1.21	1.34	0.11	2.35	65	0	143	80	62	98	1	156	Burning feet, Pain
14	2023-05-30T06:54:22.262401768Z	32.4	44.5	1.52	0.7	0.85	1.6	1.2	1.33	0.11	2.34	65	0	143	80	62	98	1	156	Burning feet, Pain
14	2023-05-30T06:54:25.103285538Z	32.4	44.6	1.51	0.71	0.85	1.58	1.19	1.32	0.11	2.32	65	0	143	80	62	98	1	156	Burning feet, Pain
14	2023-05-30T06:54:27.944137053Z	32.4	44.6	1.51	0.71	0.84	1.57	1.18	1.31	0.11	2.32	65	0	143	80	62	98	1	156	Burning feet, Pain
14	2023-05-30T06:54:31.847694796Z	32.4	44.6	1.51	0.71	0.84	1.55	1.17	1.3	0.11	2.31	65	0	143	80	62	98	1	156	Burning feet, Pain
14	2023-05-30T06:54:35.160763995Z	32.4	44.5	1.5	0.71	0.84	1.54	1.16	1.29	0.11	2.3	65	0	143	80	62	98	1	156	Burning feet, Pain
14	2023-05-30T06:54:38.182956002Z	32.4	44.5	1.49	0.71	0.84	1.53	1.15	1.28	0.11	2.29	65	0	143	80	62	98	1	156	Burning feet, Pain
14	2023-05-30T06:54:40.850027576Z	32.4	44.4	1.49	0.71	0.84	1.52	1.14	1.28	0.11	2.29	65	0	143	80	62	98	1	156	Burning feet, Pain
14	2023-05-30T06:54:43.503096905Z	32.4	44.3	1.49	0.71	0.84	1.51	1.14	1.27	0.11	2.28	65	0	143	80	62	98	1	156	Burning feet, Pain
14	2023-05-30T06:54:45.97120835Z	32.3	44.4	1.48	0.72	0.84	1.5	1.13	1.27	0.11	2.28	65	0	143	80	62	98	1	156	Burning feet, Pain
14	2023-05-30T06:54:49.519972459Z	32.3	44.5	1.48	0.72	0.84	1.5	1.13	1.26	0.11	2.28	65	0	143	80	62	98	1	156	Burning feet, Pain
14	2023-05-30T06:54:52.518385424Z	32.4	44.7	1.48	0.72	0.84	1.5	1.13	1.26	0.11	2.27	65	0	143	80	62	98	1	156	Burning feet, Pain
14	2023-05-30T06:54:54.970490602Z	32.3	44.3	1.48	0.72	0.84	1.5	1.12	1.26	0.11	2.27	65	0	143	80	62	98	1	156	Burning feet, Pain
14	2023-05-30T06:54:57.844372321Z	32.3	44.4	1.48	0.72	0.84	1.49	1.12	1.25	0.11	2.27	65	0	143	80	62	98	1	156	Burning feet, Pain
14	2023-05-30T06:55:00.747186147Z	32.3	44.5	1.48	0.72	0.84	1.49	1.12	1.25	0.11	2.27	65	0	143	80	62	98	1	156	Burning feet, Pain
14	2023-05-30T06:55:04.400246448Z	32.4	44.6	1.47	0.72	0.84	1.48	1.11	1.25	0.11	2.27	65	0	143	80	62	98	1	156	Burning feet, Pain
14	2023-05-30T06:55:07.259069252Z	32.3	44.7	1.47	0.73	0.84	1.48	1.11	1.25	0.11	2.27	65	0	143	80	62	98	1	156	Burning feet, Pain
14	2023-05-30T06:55:10.574957482Z	32.3	44.5	1.47	0.73	0.85	1.48	1.11	1.25	0.11	2.26	65	0	143	80	62	98	1	156	Burning feet, Pain
14	2023-05-30T06:55:14.220985596Z	32.3	44.6	1.47	0.73	0.85	1.48	1.11	1.24	0.11	2.26	65	0	143	80	62	98	1	156	Burning feet, Pain
14	2023-05-30T06:55:17.105603994Z	32.3	44.4	1.46	0.73	0.85	1.47	1.1	1.24	0.11	2.26	65	0	143	80	62	98	1	156	Burning feet, Pain
14	2023-05-30T06:55:20.161792906Z	32.3	44.5	1.46	0.73	0.88	1.51	1.07	1.24	0.11	2.16	65	0	143	80	62	98	1	156	Burning feet, Pain
14	2023-05-30T06:55:23.037096502Z	32	44.1	1.47	0.73	0.88	1.53	1.1	1.27	0.11	2.24	65	0	143	80	62	98	1	156	Burning feet, Pain
14	2023-05-30T06:55:25.991192498Z	32	44.1	1.46	0.73	0.87	1.51	1.1	1.26	0.11	2.26	65	0	143	80	62	98	1	156	Burning feet, Pain
14	2023-05-30T06:55:28.773480435Z	32	44.2	1.45	0.72	0.85	1.49	1.1	1.24	0.11	2.26	65	0	143	80	62	98	1	156	Burning feet, Pain
14	2023-05-30T06:55:32.254064093Z	32	44.3	1.44	0.71	0.84	1.48	1.09	1.23	0.11	2.26	65	0	143	80	62	98	1	156	Burning feet, Pain
15	2023-05-30T06:55:34.909743765Z	32.1	44.4	1.44	0.71	0.83	1.47	1.09	1.23	0.11	2.26	55	1	140	77	62	97	1	93	Weakness, Pain
15	2023-05-30T06:55:37.363019315Z	32.1	44.8	1.44	0.71	0.83	1.47	1.09	1.23	0.11	2.27	55	1	140	77	62	97	1	93	Weakness, Pain
15	2023-05-30T06:55:41.059156187Z	32	45.1	1.44	0.71	0.83	1.47	1.09	1.23	0.11	2.27	55	1	140	77	62	97	1	93	Weakness, Pain
15	2023-05-30T06:55:43.943946799Z	32.1	45.4	1.44	0.71	0.83	1.47	1.09	1.23	0.11	2.27	55	1	140	77	62	97	1	93	Weakness, Pain
15	2023-05-30T06:55:46.818109322Z	32.1	46	1.45	0.71	0.84	1.47	1.09	1.23	0.11	2.28	55	1	140	77	62	97	1	93	Weakness, Pain
15	2023-05-30T06:55:50.545987832Z	32.1	46.3	1.45	0.72	0.84	1.48	1.09	1.23	0.11	2.28	55	1	140	77	62	97	1	93	Weakness, Pain
15	2023-05-30T06:55:54.166428476Z	32.2	46.7	1.45	0.72	0.85	1.48	1.1	1.23	0.11	2.29	55	1	140	77	62	97	1	93	Weakness, Pain
15	2023-05-30T06:55:57.24240733Z	32.2	47.3	1.45	0.72	0.85	1.49	1.1	1.23	0.11	2.29	55	1	140	77	62	97	1	93	Weakness, Pain
15	2023-05-30T06:56:00.504378519Z	32.2	47.7	1.46	0.72	0.86	1.49	1.1	1.23	0.11	2.29	55	1	140	77	62	97	1	93	Weakness, Pain
15	2023-05-30T06:56:03.372909872Z	32.2	48.2	1.46	0.72	0.86	1.5	1.1	1.24	0.11	2.3	55	1	140	77	62	97	1	93	Weakness, Pain
15	2023-05-30T06:56:06.261722128Z	32.3	48.7	1.46	0.72	0.87	1.5	1.1	1.24	0.11	2.3	55	1	140	77	62	97	1	93	Weakness, Pain
15	2023-05-30T06:56:09.961661134Z	32.3	48.9	1.46	0.72	0.87	1.51	1.1	1.24	0.11	2.31	55	1	140	77	62	97	1	93	Weakness, Pain
15	2023-05-30T06:56:12.613819428Z	32.3	49.4	1.46	0.72	0.88	1.52	1.1	1.24	0.11	2.31	55	1	140	77	62	97	1	93	Weakness, Pain
15	2023-05-30T06:56:15.476678053Z	32.3	49.8	1.47	0.72	0.88	1.52	1.11	1.24	0.11	2.32	55	1	140	77	62	97	1	93	Weakness, Pain
15	2023-05-30T06:56:18.334336347Z	32.4	50.2	1.47	0.72	0.89	1.53	1.11	1.25	0.11	2.32	55	1	140	77	62	97	1	93	Weakness, Pain
15	2023-05-30T06:56:22.109701498Z	32.4	50.5	1.45	0.72	0.89	1.53	1.11	1.25	0.11	2.33	55	1	140	77	62	97	1	93	Weakness, Pain
15	2023-05-30T06:56:25.093544857Z	32.4	50.8	1.46	0.72	0.89	1.54	1.11	1.24	0.11	2.32	55	1	140	77	62	97	1	93	Weakness, Pain
15	2023-05-30T06:56:34.00064728Z	32.4	51.2	1.47	0.72	0.9	1.55	1.11	1.25	0.11	2.33	55	1	140	77	62	97	1	93	Weakness, Pain
15	2023-05-30T06:56:36.367952559Z	32.5	51.6	1.48	0.73	0.91	1.57	1.12	1.26	0.11	2.34	55	1	140	77	62	97	1	93	Weakness, Pain
15	2023-05-30T06:56:39.451555415Z	32.6	52.1	1.48	0.73	0.92	1.58	1.11	1.26	0.11	2.35	55	1	140	77	62	97	1	93	Weakness, Pain
15	2023-05-30T06:56:42.288924907Z	32.6	52.8	1.48	0.73	0.92	1.58	1.11	1.26	0.11	2.35	55	1	140	77	62	97	1	93	Weakness, Pain
15	2023-05-30T06:56:45.147891729Z	32.6	53.1	1.48	0.73	0.92	1.59	1.12	1.26	0.11	2.35	55	1	140	77	62	97	1	93	Weakness, Pain
15	2023-05-30T06:56:47.821858802Z	32.6	53.4	1.49	0.73	0.93	1.59	1.12	1.26	0.11	2.36	55	1	140	77	62	97	1	93	Weakness, Pain
15	2023-05-30T06:56:51.111656029Z	32.6	53.7	1.49	0.73	0.93	1.6	1.11	1.27	0.11	2.35	55	1	140	77	62	97	1	93	Weakness, Pain
15	2023-05-30T06:56:53.962449244Z	32.7	54.1	1.5	0.73	0.94	1.6	1.13	1.28	0.11	2.37	55	1	140	77	62	97	1	93	Weakness, Pain
15	2023-05-30T06:56:56.415275755Z	32.7	54.9	1.67	0.76	1.06	1.69	1.28	1.41	0.11	2.45	55	1	140	77	62	97	1	93	Weakness, Pain
15	2023-05-30T06:56:59.510269495Z	32.7	56.2	1.88	0.79	1.4	1.96	1.47	1.59	0.11	2.56	55	1	140	77	62	97	1	93	Weakness, Pain
15	2023-05-30T06:57:02.212678936Z	32.7	56.8	2.06	0.81	1.73	2.24	1.65	1.74	0.11	2.65	55	1	140	77	62	97	1	93	Weakness, Pain
15	2023-05-30T06:57:05.444349435Z	32.8	57.4	2.14	0.81	1.91	2.41	1.71	1.8	0.11	2.67	55	1	140	77	62	97	1	93	Weakness, Pain
15	2023-05-30T06:57:08.505140266Z	32.8	57.3	2.16	0.82	2.03	2.51	1.74	1.84	0.11	2.71	55	1	140	77	62	97	1	93	Weakness, Pain
15	2023-05-30T06:57:10.993208154Z	32.8	57.5	2.17	0.82	2.05	2.56	1.76	1.85	0.11	2.72	55	1	140	77	62	97	1	93	Weakness, Pain
15	2023-05-30T06:57:13.865782444Z	32.8	57.7	2.18	0.82	2.05	2.59	1.78	1.86	0.11	2.73	55	1	140	77	62	97	1	93	Weakness, Pain
15	2023-05-30T06:57:16.699247916Z	32.8	57.9	2.18	0.82	2.05	2.61	1.79	1.87	0.11	2.74	55	1	140	77	62	97	1	93	Weakness, Pain
15	2023-05-30T06:57:19.576492558Z	32.8	58.1	2.18	0.83	2.04	2.63	1.8	1.87	0.11	2.75	55	1	140	77	62	97	1	93	Weakness, Pain
15	2023-05-30T06:57:22.442806455Z	32.8	58.3	2.18	0.83	2.03	2.64	1.8	1.87	0.11	2.76	55	1	140	77	62	97	1	93	Weakness, Pain
15	2023-05-30T06:57:25.533031596Z	32.9	58.5	2.18	0.83	2.02	2.65	1.8	1.87	0.11	2.76	55	1	140	77	62	97	1	93	Weakness, Pain
15	2023-05-30T06:57:28.379762827Z	32.9	58.8	2.17	0.83	2.01	2.65	1.81	1.87	0.11	2.76	55	1	140	77	62	97	1	93	Weakness, Pain
15	2023-05-30T06:57:31.690706279Z	32.9	58.9	2.17	0.83	2	2.66	1.81	1.87	0.11	2.76	55	1	140	77	62	97	1	93	Weakness, Pain
15	2023-05-30T06:57:34.324617383Z	32.9	59.2	2.17	0.83	1.99	2.66	1.81	1.87	0.11	2.77	55	1	140	77	62	97	1	93	Weakness, Pain
15	2023-05-30T06:57:37.174982771Z	33	59.5	2.17	0.83	1.98	2.66	1.81	1.87	0.11	2.77	55	1	140	77	62	97	1	93	Weakness, Pain
15	2023-05-30T06:57:40.248798724Z	33	59.7	2.16	0.83	1.97	2.67	1.81	1.87	0.11	2.76	55	1	140	77	62	97	1	93	Weakness, Pain
15	2023-05-30T06:57:43.115977328Z	33	59.8	2.16	0.83	1.95	2.67	1.81	1.86	0.11	2.76	55	1	140	77	62	97	1	93	Weakness, Pain
15	2023-05-30T06:57:46.587881617Z	33	60.1	2.16	0.82	1.94	2.66	1.8	1.86	0.11	2.76	55	1	140	77	62	97	1	93	Weakness, Pain
15	2023-05-30T06:57:49.256612711Z	33	60.3	2.15	0.82	1.93	2.66	1.8	1.86	0.11	2.76	55	1	140	77	62	97	1	93	Weakness, Pain
15	2023-05-30T06:57:52.123514816Z	33.1	60.7	2.15	0.82	1.92	2.66	1.8	1.85	0.11	2.76	55	1	140	77	62	97	1	93	Weakness, Pain
15	2023-05-30T06:57:55.462068257Z	33.1	60.9	2.14	0.82	1.92	2.66	1.79	1.85	0.11	2.76	55	1	140	77	62	97	1	93	Weakness, Pain
15	2023-05-30T06:57:58.28544744Z	33.1	61.1	2.14	0.82	1.91	2.66	1.79	1.84	0.11	2.76	55	1	140	77	62	97	1	93	Weakness, Pain
15	2023-05-30T06:58:01.755812369Z	33	61.3	2.14	0.82	1.9	2.65	1.78	1.84	0.11	2.76	55	1	140	77	62	97	1	93	Weakness, Pain
15	2023-05-30T06:58:05.239164136Z	33.1	61.6	2.13	0.82	1.89	2.65	1.78	1.84	0.11	2.76	55	1	140	77	62	97	1	93	Weakness, Pain
15	2023-05-30T06:58:08.106678845Z	33.1	61.8	2.13	0.82	1.89	2.65	1.77	1.83	0.11	2.75	55	1	140	77	62	97	1	93	Weakness, Pain
15	2023-05-30T06:58:11.800270799Z	33.1	62.1	2.12	0.82	1.88	2.65	1.77	1.83	0.11	2.75	55	1	140	77	62	97	1	93	Weakness, Pain
15	2023-05-30T06:58:15.445783927Z	33.1	62.4	2.12	0.82	1.87	2.64	1.76	1.82	0.11	2.75	55	1	140	77	62	97	1	93	Weakness, Pain
15	2023-05-30T06:58:18.551590735Z	33.1	62.7	2.11	0.82	1.86	2.64	1.75	1.81	0.11	2.74	55	1	140	77	62	97	1	93	Weakness, Pain
15	2023-05-30T06:58:21.210976355Z	33.1	63	2.11	0.81	1.86	2.64	1.75	1.81	0.11	2.74	55	1	140	77	62	97	1	93	Weakness, Pain
15	2023-05-30T06:58:24.527640309Z	33.2	63.2	2.1	0.81	1.85	2.63	1.74	1.81	0.11	2.74	55	1	140	77	62	97	1	93	Weakness, Pain
15	2023-05-30T06:58:27.159364601Z	33.2	63.3	2.09	0.81	1.84	2.63	1.74	1.8	0.11	2.74	55	1	140	77	62	97	1	93	Weakness, Pain
15	2023-05-30T06:58:30.220156599Z	33.2	63.6	2.09	0.81	1.84	2.63	1.74	1.8	0.11	2.74	55	1	140	77	62	97	1	93	Weakness, Pain
15	2023-05-30T06:58:33.298037854Z	33.2	63.8	2.09	0.81	1.83	2.62	1.73	1.79	0.11	2.73	55	1	140	77	62	97	1	93	Weakness, Pain
15	2023-05-30T06:58:35.961032543Z	33.2	63.9	2.08	0.81	1.82	2.62	1.73	1.79	0.11	2.73	55	1	140	77	62	97	1	93	Weakness, Pain
15	2023-05-30T06:58:39.222254399Z	33.2	64.2	2.08	0.81	1.81	2.62	1.72	1.78	0.11	2.73	55	1	140	77	62	97	1	93	Weakness, Pain
15	2023-05-30T06:58:42.104359257Z	33.2	64.3	2.07	0.81	1.81	2.62	1.71	1.77	0.11	2.71	55	1	140	77	62	97	1	93	Weakness, Pain
15	2023-05-30T06:58:44.964235917Z	33.3	63.8	2.04	0.8	1.72	2.56	1.65	1.74	0.11	2.63	55	1	140	77	62	97	1	93	Weakness, Pain
15	2023-05-30T06:58:47.422246908Z	33.3	60.1	1.99	0.79	1.65	2.49	1.61	1.68	0.11	2.54	55	1	140	77	62	97	1	93	Weakness, Pain
15	2023-05-30T06:58:50.088868753Z	33.3	56.4	1.95	0.79	1.57	2.42	1.55	1.63	0.11	2.5	55	1	140	77	62	97	1	93	Weakness, Pain
15	2023-05-30T06:58:53.002492043Z	33.2	53.9	1.89	0.78	1.47	2.33	1.49	1.58	0.11	2.44	55	1	140	77	62	97	1	93	Weakness, Pain
15	2023-05-30T06:58:55.83661705Z	33.2	51.6	1.82	0.78	1.36	2.22	1.45	1.52	0.11	2.41	55	1	140	77	62	97	1	93	Weakness, Pain
15	2023-05-30T06:58:58.488683223Z	33.2	49.7	1.76	0.77	1.26	2.12	1.41	1.48	0.11	2.39	55	1	140	77	62	97	1	93	Weakness, Pain
15	2023-05-30T06:59:01.983843145Z	33.2	48.1	1.71	0.77	1.15	2.02	1.37	1.44	0.11	2.36	55	1	140	77	62	97	1	93	Weakness, Pain
15	2023-05-30T06:59:04.416469438Z	33.1	46.8	1.68	0.77	1.09	1.96	1.33	1.41	0.11	2.34	55	1	140	77	62	97	1	93	Weakness, Pain
15	2023-05-30T06:59:07.780754279Z	33.1	46.3	1.65	0.77	1.05	1.92	1.31	1.39	0.11	2.32	55	1	140	77	62	97	1	93	Weakness, Pain
15	2023-05-30T06:59:11.233173968Z	33.1	45.9	1.62	0.76	1	1.86	1.28	1.36	0.11	2.3	55	1	140	77	62	97	1	93	Weakness, Pain
15	2023-05-30T06:59:14.876852855Z	33.1	45.4	1.6	0.76	0.97	1.81	1.26	1.34	0.11	2.29	55	1	140	77	62	97	1	93	Weakness, Pain
15	2023-05-30T06:59:17.347296351Z	33	45.1	1.57	0.76	0.95	1.76	1.24	1.32	0.11	2.28	55	1	140	77	62	97	1	93	Weakness, Pain
15	2023-05-30T06:59:20.38922653Z	33	44.8	1.56	0.76	0.94	1.73	1.22	1.3	0.11	2.27	55	1	140	77	62	97	1	93	Weakness, Pain
15	2023-05-30T06:59:23.717896225Z	33	44.6	1.54	0.76	0.92	1.7	1.21	1.29	0.11	2.26	55	1	140	77	62	97	1	93	Weakness, Pain
15	2023-05-30T06:59:26.549092839Z	32.9	44.3	1.53	0.75	0.91	1.67	1.19	1.28	0.11	2.26	55	1	140	77	62	97	1	93	Weakness, Pain
15	2023-05-30T06:59:30.081648377Z	32.9	44.2	1.52	0.75	0.91	1.65	1.18	1.27	0.11	2.25	55	1	140	77	62	97	1	93	Weakness, Pain
15	2023-05-30T06:59:32.878292053Z	32.8	44	1.52	0.75	0.9	1.63	1.17	1.26	0.11	2.25	55	1	140	77	62	97	1	93	Weakness, Pain
15	2023-05-30T06:59:35.952889934Z	32.8	44.1	1.51	0.75	0.89	1.61	1.17	1.26	0.11	2.24	55	1	140	77	62	97	1	93	Weakness, Pain
15	2023-05-30T06:59:38.824936285Z	32.8	44.1	1.51	0.76	0.9	1.61	1.17	1.25	0.13	2.25	55	1	140	77	62	97	1	93	Weakness, Pain
15	2023-05-30T06:59:41.913423458Z	32.7	44.2	1.48	0.74	0.88	1.58	1.14	1.23	0.11	2.24	55	1	140	77	62	97	1	93	Weakness, Pain
15	2023-05-30T06:59:45.19765011Z	32.7	44.2	1.51	0.76	0.9	1.59	1.15	1.26	0.11	2.26	55	1	140	77	62	97	1	93	Weakness, Pain
15	2023-05-30T06:59:48.060575306Z	32.7	44.1	1.53	0.77	0.92	1.58	1.16	1.27	0.11	2.27	55	1	140	77	62	97	1	93	Weakness, Pain
15	2023-05-30T06:59:51.712185065Z	32.7	44.1	1.52	0.77	0.92	1.57	1.16	1.26	0.11	2.27	55	1	140	77	62	97	1	93	Weakness, Pain
15	2023-05-30T06:59:54.40294397Z	32.7	44.2	1.51	0.77	0.92	1.56	1.16	1.26	0.11	2.26	55	1	140	77	62	97	1	93	Weakness, Pain
15	2023-05-30T06:59:57.263780425Z	32.7	44.2	1.5	0.77	0.93	1.55	1.15	1.25	0.11	2.26	55	1	140	77	62	97	1	93	Weakness, Pain
15	2023-05-30T07:00:00.729450882Z	32.7	44.1	1.5	0.77	0.93	1.54	1.14	1.24	0.11	2.26	55	1	140	77	62	97	1	93	Weakness, Pain
15	2023-05-30T07:00:03.409886168Z	32.7	44.1	1.49	0.77	0.92	1.54	1.14	1.24	0.11	2.25	55	1	140	77	62	97	1	93	Weakness, Pain
15	2023-05-30T07:00:06.471116842Z	32.7	44.1	1.48	0.77	0.92	1.53	1.14	1.23	0.11	2.25	55	1	140	77	62	97	1	93	Weakness, Pain
15	2023-05-30T07:00:09.134846745Z	32.6	43.9	1.48	0.77	0.92	1.52	1.13	1.23	0.11	2.25	55	1	140	77	62	97	1	93	Weakness, Pain
15	2023-05-30T07:00:12.209282883Z	32.6	43.9	1.47	0.77	0.92	1.51	1.12	1.22	0.11	2.24	55	1	140	77	62	97	1	93	Weakness, Pain
15	2023-05-30T07:00:15.298851889Z	32.6	44	1.47	0.77	0.92	1.5	1.12	1.22	0.11	2.24	55	1	140	77	62	97	1	93	Weakness, Pain
15	2023-05-30T07:00:18.155733103Z	32.6	43.8	1.46	0.76	0.91	1.49	1.11	1.21	0.11	2.24	55	1	140	77	62	97	1	93	Weakness, Pain
15	2023-05-30T07:00:21.418330804Z	32.5	43.7	1.46	0.76	0.91	1.49	1.11	1.21	0.11	2.24	55	1	140	77	62	97	1	93	Weakness, Pain
15	2023-05-30T07:00:24.481213166Z	32.5	43.7	1.45	0.76	0.91	1.49	1.11	1.21	0.11	2.24	55	1	140	77	62	97	1	93	Weakness, Pain
15	2023-05-30T07:00:27.385396126Z	32.5	44	1.45	0.76	0.91	1.48	1.1	1.21	0.11	2.24	55	1	140	77	62	97	1	93	Weakness, Pain
15	2023-05-30T07:00:30.666374749Z	32.5	44.1	1.45	0.76	0.91	1.48	1.1	1.2	0.11	2.25	55	1	140	77	62	97	1	93	Weakness, Pain
15	2023-05-30T07:00:33.716443195Z	32.5	44	1.45	0.76	0.91	1.47	1.1	1.2	0.11	2.25	55	1	140	77	62	97	1	93	Weakness, Pain
15	2023-05-30T07:00:36.578186984Z	32.5	44.1	1.45	0.76	0.91	1.47	1.1	1.2	0.11	2.24	55	1	140	77	62	97	1	93	Weakness, Pain
15	2023-05-30T07:00:40.887941419Z	32.4	44	1.45	0.76	0.91	1.48	1.1	1.2	0.11	2.25	55	1	140	77	62	97	1	93	Weakness, Pain
15	2023-05-30T07:00:44.560334443Z	32.4	44.1	1.45	0.77	0.91	1.48	1.1	1.2	0.11	2.25	55	1	140	77	62	97	1	93	Weakness, Pain
15	2023-05-30T07:00:47.450393196Z	32.4	44.3	1.44	0.76	0.91	1.47	1.1	1.2	0.11	2.26	55	1	140	77	62	97	1	93	Weakness, Pain
15	2023-05-30T07:00:50.30097493Z	32.5	44.5	1.45	0.76	0.91	1.47	1.1	1.21	0.11	2.27	55	1	140	77	62	97	1	93	Weakness, Pain
15	2023-05-30T07:00:53.569598452Z	32.5	44.6	1.46	0.77	0.91	1.47	1.11	1.22	0.11	2.27	55	1	140	77	62	97	1	93	Weakness, Pain
15	2023-05-30T07:00:56.880444148Z	32.5	44.7	1.47	0.77	0.91	1.47	1.12	1.22	0.11	2.27	55	1	140	77	62	97	1	93	Weakness, Pain
15	2023-05-30T07:00:59.928262877Z	32.4	44.4	1.46	0.76	0.91	1.46	1.11	1.22	0.11	2.26	55	1	140	77	62	97	1	93	Weakness, Pain
15	2023-05-30T07:01:02.627113536Z	32.5	44.2	1.46	0.76	0.91	1.46	1.1	1.21	0.11	2.26	55	1	140	77	62	97	1	93	Weakness, Pain
15	2023-05-30T07:01:05.665339476Z	32.4	44.1	1.45	0.76	0.91	1.45	1.1	1.21	0.11	2.25	55	1	140	77	62	97	1	93	Weakness, Pain
15	2023-05-30T07:01:09.143654403Z	32.5	44.1	1.45	0.76	0.9	1.45	1.1	1.2	0.11	2.25	55	1	140	77	62	97	1	93	Weakness, Pain
15	2023-05-30T07:01:11.812256017Z	32.4	44	1.44	0.75	0.9	1.45	1.09	1.2	0.11	2.25	55	1	140	77	62	97	1	93	Weakness, Pain
15	2023-05-30T07:01:14.671404097Z	32.5	44.1	1.46	0.76	0.9	1.47	1.09	1.2	0.11	2.26	55	1	140	77	62	97	1	93	Weakness, Pain
15	2023-05-30T07:01:17.757261512Z	32.4	44.1	1.44	0.75	0.88	1.45	1.09	1.19	0.11	2.24	55	1	140	77	62	97	1	93	Weakness, Pain
15	2023-05-30T07:01:20.214569653Z	32.5	44.1	1.46	0.76	0.9	1.46	1.1	1.21	0.11	2.26	55	1	140	77	62	97	1	93	Weakness, Pain
15	2023-05-30T09:23:01.239336751Z	30.6	47.9	1.39	0.74	0.67	1.36	1.08	1.19	0.09	2.1	55	1	140	77	62	97	1	93	Weakness, Pain
15	2023-05-30T09:23:04.512249405Z	30.6	47.8	1.39	0.74	0.67	1.36	1.08	1.19	0.09	2.1	55	1	140	77	62	97	1	93	Weakness, Pain
15	2023-05-30T09:23:07.400249005Z	30.6	47.8	1.39	0.74	0.67	1.36	1.08	1.19	0.09	2.1	55	1	140	77	62	97	1	93	Weakness, Pain
15	2023-05-30T09:23:09.874532699Z	30.6	47.9	1.39	0.74	0.67	1.36	1.08	1.19	0.09	2.1	55	1	140	77	62	97	1	93	Weakness, Pain
15	2023-05-30T09:23:12.515372674Z	30.6	47.9	1.39	0.74	0.67	1.36	1.08	1.19	0.09	2.1	55	1	140	77	62	97	1	93	Weakness, Pain
15	2023-05-30T09:23:15.98403504Z	30.6	47.8	1.39	0.73	0.67	1.36	1.08	1.19	0.09	2.1	55	1	140	77	62	97	1	93	Weakness, Pain
15	2023-05-30T09:23:18.853817433Z	30.6	47.9	1.39	0.73	0.68	1.36	1.08	1.19	0.09	2.1	55	1	140	77	62	97	1	93	Weakness, Pain
15	2023-05-30T09:23:23.029506406Z	30.6	48	1.39	0.73	0.68	1.36	1.08	1.19	0.09	2.1	55	1	140	77	62	97	1	93	Weakness, Pain
15	2023-05-30T09:23:26.22042831Z	30.6	48	1.4	0.74	0.68	1.36	1.08	1.19	0.09	2.1	55	1	140	77	62	97	1	93	Weakness, Pain
15	2023-05-30T09:23:30.117388447Z	30.6	47.9	1.4	0.74	0.68	1.36	1.08	1.2	0.09	2.1	55	1	140	77	62	97	1	93	Weakness, Pain
15	2023-05-30T09:23:33.599212918Z	30.6	47.9	1.4	0.74	0.68	1.36	1.08	1.2	0.09	2.11	55	1	140	77	62	97	1	93	Weakness, Pain
15	2023-05-30T09:23:43.835015422Z	30.6	47.9	1.4	0.74	0.68	1.36	1.08	1.2	0.09	2.11	55	1	140	77	62	97	1	93	Weakness, Pain
15	2023-05-30T09:23:46.69598272Z	30.6	48	1.39	0.74	0.68	1.35	1.08	1.19	0.09	2.11	55	1	140	77	62	97	1	93	Weakness, Pain
15	2023-05-30T09:23:50.087390728Z	30.6	48	1.39	0.74	0.69	1.36	1.08	1.19	0.09	2.11	55	1	140	77	62	97	1	93	Weakness, Pain
15	2023-05-30T09:23:53.290914276Z	30.6	48.2	1.39	0.74	0.69	1.36	1.08	1.19	0.09	2.11	55	1	140	77	62	97	1	93	Weakness, Pain
15	2023-05-30T09:24:00.478557052Z	30.6	48.2	1.39	0.74	0.69	1.36	1.08	1.19	0.09	2.1	55	1	140	77	62	97	1	93	Weakness, Pain
15	2023-05-30T09:24:12.719489122Z	30.6	48.3	1.38	0.73	0.69	1.36	1.07	1.18	0.09	2.1	55	1	140	77	62	97	1	93	Weakness, Pain
15	2023-05-30T09:24:16.050895105Z	30.6	48.1	1.38	0.73	0.69	1.36	1.07	1.18	0.09	2.1	55	1	140	77	62	97	1	93	Weakness, Pain
15	2023-05-30T09:24:19.303075855Z	30.7	47.8	1.38	0.73	0.69	1.35	1.07	1.18	0.09	2.11	55	1	140	77	62	97	1	93	Weakness, Pain
15	2023-05-30T09:24:25.477162731Z	30.7	48	1.33	0.7	0.65	1.34	1.04	1.14	0.09	2.07	55	1	140	77	62	97	1	93	Weakness, Pain
16	2023-05-30T09:24:29.753990992Z	30.8	48.2	1.35	0.71	0.65	1.35	1.04	1.16	0.09	2.09	27	1	116	74	80	99	0	98
16	2023-05-30T09:24:33.410698468Z	30.8	48.2	1.36	0.71	0.66	1.35	1.05	1.17	0.09	2.09	27	1	116	74	80	99	0	98
16	2023-05-30T09:24:46.367422449Z	30.8	48.1	1.37	0.71	0.66	1.36	1.05	1.17	0.09	2.09	27	1	116	74	80	99	0	98
16	2023-05-30T09:24:49.385222719Z	30.8	48	1.38	0.71	0.66	1.36	1.06	1.19	0.09	2.1	27	1	116	74	80	99	0	98
16	2023-05-30T09:24:53.924183981Z	30.9	48.2	1.38	0.72	0.67	1.36	1.06	1.19	0.09	2.1	27	1	116	74	80	99	0	98
16	2023-05-30T09:24:57.249746064Z	30.9	47.9	1.38	0.72	0.66	1.36	1.06	1.19	0.09	2.1	27	1	116	74	80	99	0	98
16	2023-05-30T09:25:03.314961547Z	30.9	47.8	1.39	0.72	0.66	1.35	1.06	1.19	0.09	2.11	27	1	116	74	80	99	0	98
16	2023-05-30T09:25:06.97905348Z	31	47.7	1.39	0.72	0.67	1.35	1.07	1.19	0.09	2.11	27	1	116	74	80	99	0	98
16	2023-05-30T09:25:17.716671692Z	31	47.6	1.39	0.72	0.67	1.36	1.07	1.2	0.09	2.11	27	1	116	74	80	99	0	98
16	2023-05-30T09:25:20.151668955Z	31	47.6	1.39	0.72	0.67	1.36	1.07	1.2	0.09	2.11	27	1	116	74	80	99	0	98
16	2023-05-30T09:25:23.979666969Z	31	47.6	1.39	0.72	0.67	1.35	1.07	1.19	0.09	2.11	27	1	116	74	80	99	0	98
16	2023-05-30T09:25:27.472753036Z	31	47.5	1.39	0.72	0.67	1.35	1.07	1.19	0.09	2.11	27	1	116	74	80	99	0	98
16	2023-05-30T09:25:31.595841434Z	31	47.9	1.39	0.72	0.67	1.35	1.07	1.19	0.09	2.11	27	1	116	74	80	99	0	98
16	2023-05-30T09:25:36.951941835Z	30.9	47.7	1.39	0.72	0.68	1.35	1.07	1.2	0.09	2.11	27	1	116	74	80	99	0	98
16	2023-05-30T09:25:40.934087006Z	30.9	47.6	1.39	0.72	0.68	1.35	1.07	1.2	0.09	2.11	27	1	116	74	80	99	0	98
16	2023-05-30T09:25:44.062232857Z	31	47.5	1.39	0.72	0.68	1.35	1.07	1.19	0.09	2.11	27	1	116	74	80	99	0	98
16	2023-05-30T09:25:46.925405657Z	31	47.5	1.39	0.72	0.68	1.35	1.07	1.19	0.09	2.11	27	1	116	74	80	99	0	98
16	2023-05-30T09:25:55.146851309Z	30.9	47.5	1.39	0.72	0.68	1.35	1.07	1.19	0.09	2.11	27	1	116	74	80	99	0	98
16	2023-05-30T09:25:57.823815817Z	30.9	47.4	1.39	0.72	0.68	1.35	1.06	1.19	0.09	2.1	27	1	116	74	80	99	0	98
16	2023-05-30T09:26:00.450363651Z	31	47.6	1.39	0.72	0.68	1.35	1.06	1.19	0.09	2.1	27	1	116	74	80	99	0	98
16	2023-05-30T09:26:03.305990082Z	31	47.6	1.39	0.72	0.68	1.35	1.06	1.19	0.09	2.1	27	1	116	74	80	99	0	98
16	2023-05-30T09:26:06.799401303Z	31	47.6	1.39	0.72	0.68	1.35	1.06	1.19	0.09	2.11	27	1	116	74	80	99	0	98
16	2023-05-30T09:26:10.724715332Z	31	47.6	1.38	0.72	0.68	1.35	1.06	1.19	0.09	2.11	27	1	116	74	80	99	0	98
16	2023-05-30T09:26:14.36769442Z	31	47.6	1.38	0.72	0.68	1.35	1.06	1.19	0.09	2.1	27	1	116	74	80	99	0	98
16	2023-05-30T09:26:17.239287518Z	31	47.5	1.39	0.72	0.68	1.34	1.06	1.19	0.09	2.11	27	1	116	74	80	99	0	98
16	2023-05-30T09:26:20.126796389Z	31	47.5	1.38	0.72	0.68	1.35	1.06	1.19	0.09	2.11	27	1	116	74	80	99	0	98
16	2023-05-30T09:26:23.574883087Z	31	47.6	1.38	0.72	0.69	1.35	1.06	1.19	0.09	2.11	27	1	116	74	80	99	0	98
16	2023-05-30T09:26:28.109085569Z	31	47.5	1.38	0.72	0.69	1.35	1.06	1.19	0.09	2.11	27	1	116	74	80	99	0	98
16	2023-05-30T09:26:31.768871424Z	31	47.4	1.38	0.72	0.69	1.34	1.06	1.19	0.09	2.11	27	1	116	74	80	99	0	98
16	2023-05-30T09:26:34.674260312Z	31	47.5	1.38	0.72	0.69	1.34	1.06	1.19	0.09	2.1	27	1	116	74	80	99	0	98
16	2023-05-30T09:26:38.957322435Z	31.1	47.4	1.38	0.72	0.69	1.34	1.06	1.19	0.09	2.11	27	1	116	74	80	99	0	98
16	2023-05-30T09:26:42.62437009Z	31.1	47.4	1.38	0.72	0.69	1.34	1.06	1.18	0.09	2.1	27	1	116	74	80	99	0	98
16	2023-05-30T09:26:45.299412324Z	31.1	47.2	1.38	0.72	0.69	1.34	1.06	1.18	0.09	2.1	27	1	116	74	80	99	0	98
16	2023-05-30T09:26:48.999892695Z	31.1	47.2	1.38	0.72	0.69	1.34	1.06	1.18	0.09	2.11	27	1	116	74	80	99	0	98
16	2023-05-30T09:26:51.839495558Z	31.1	47.3	1.37	0.71	0.68	1.34	1.05	1.17	0.09	2.09	27	1	116	74	80	99	0	98
16	2023-05-30T09:28:15.837132902Z	31.5	51.5	1.93	0.89	1.9	2.51	1.62	1.68	0.09	2.6	27	1	116	74	80	99	0	98
16	2023-05-30T09:28:19.080841097Z	31.6	53.1	1.92	0.89	1.9	2.52	1.62	1.68	0.09	2.6	27	1	116	74	80	99	0	98
16	2023-05-30T09:28:21.952330997Z	31.6	54.7	1.91	0.9	1.9	2.53	1.62	1.68	0.09	2.6	27	1	116	74	80	99	0	98
16	2023-05-30T09:28:24.948147576Z	31.6	55	1.91	0.89	1.89	2.54	1.61	1.67	0.09	2.6	27	1	116	74	80	99	0	98
16	2023-05-30T09:28:28.17004387Z	31.7	55.3	1.95	0.91	1.92	2.58	1.68	1.71	0.09	2.63	27	1	116	74	80	99	0	98
16	2023-05-30T09:28:31.57477867Z	31.7	55.9	2.02	0.92	2.01	2.68	1.75	1.77	0.09	2.66	27	1	116	74	80	99	0	98
16	2023-05-30T09:28:34.733108803Z	31.8	57	2.08	0.94	2.11	2.76	1.82	1.83	0.09	2.72	27	1	116	74	80	99	0	98
16	2023-05-30T09:28:37.93483705Z	31.8	58	2.14	0.96	2.26	2.83	1.88	1.88	0.09	2.77	27	1	116	74	80	99	0	98
16	2023-05-30T09:28:42.875067104Z	31.8	58.8	2.18	0.99	2.35	2.88	1.93	1.93	0.09	2.81	27	1	116	74	80	99	0	98
16	2023-05-30T09:28:47.168579979Z	31.8	59.5	2.24	1.02	2.5	2.95	2.01	2	0.09	2.89	27	1	116	74	80	99	0	98
16	2023-05-30T09:28:50.097791943Z	31.9	61.1	2.28	1.05	2.55	2.99	2.04	2.03	0.09	2.93	27	1	116	74	80	99	0	98
16	2023-05-30T09:28:53.373607374Z	31.9	61.8	2.3	1.07	2.58	3.01	2.05	2.05	0.09	2.95	27	1	116	74	80	99	0	98
16	2023-05-30T09:28:57.496562295Z	31.9	62	2.31	1.08	2.6	3.02	2.06	2.06	0.09	2.97	27	1	116	74	80	99	0	98
16	2023-05-30T09:29:02.72349363Z	32	62.2	2.31	1.1	2.61	3.03	2.05	2.06	0.09	2.98	27	1	116	74	80	99	0	98
16	2023-05-30T09:29:06.135927116Z	31.9	62.4	2.3	1.11	2.61	3.03	2.05	2.06	0.09	2.99	27	1	116	74	80	99	0	98
16	2023-05-30T09:29:11.517328119Z	32	62.8	2.29	1.12	2.6	3.03	2.04	2.06	0.09	2.99	27	1	116	74	80	99	0	98
16	2023-05-30T09:29:14.214852243Z	32	63.1	2.28	1.12	2.58	3.02	2.03	2.05	0.09	3	27	1	116	74	80	99	0	98
16	2023-05-30T09:29:16.838598874Z	32	63.3	2.28	1.12	2.56	3.01	2.02	2.04	0.09	2.99	27	1	116	74	80	99	0	98
16	2023-05-30T09:29:19.996724152Z	32	63.4	2.26	1.11	2.55	3.01	2.02	2.03	0.09	2.99	27	1	116	74	80	99	0	98
16	2023-05-30T09:29:23.743017321Z	32	63.5	2.27	1.13	2.55	3.02	2.02	2.03	0.09	3	27	1	116	74	80	99	0	98
16	2023-05-30T09:29:26.878124787Z	32.1	63.8	2.27	1.13	2.54	3.02	2.02	2.03	0.09	3	27	1	116	74	80	99	0	98
16	2023-05-30T09:29:31.207449216Z	32.1	64	2.26	1.13	2.53	3.01	2.01	2.02	0.09	3	27	1	116	74	80	99	0	98
16	2023-05-30T09:29:34.239522625Z	32.2	64.2	2.25	1.13	2.52	3.01	2	2.02	0.09	2.99	27	1	116	74	80	99	0	98
16	2023-05-30T09:29:37.53521866Z	32.2	64.4	2.24	1.12	2.5	3	1.99	2	0.09	2.98	27	1	116	74	80	99	0	98
16	2023-05-30T09:29:41.210931523Z	32.2	64.5	2.23	1.12	2.49	3	1.98	2	0.09	2.99	27	1	116	74	80	99	0	98
16	2023-05-30T09:29:44.488495054Z	32.3	64.8	2.23	1.12	2.48	3	1.98	2	0.09	2.98	27	1	116	74	80	99	0	98
16	2023-05-30T09:29:47.361027832Z	32.3	64.9	2.22	1.12	2.47	2.99	1.97	1.99	0.09	2.98	27	1	116	74	80	99	0	98
16	2023-05-30T09:29:50.636742693Z	32.3	65	2.22	1.12	2.46	2.99	1.97	1.99	0.09	2.98	27	1	116	74	80	99	0	98
16	2023-05-30T09:29:53.564918733Z	32.4	65.2	2.22	1.13	2.46	2.99	1.97	1.99	0.09	2.99	27	1	116	74	80	99	0	98
16	2023-05-30T09:29:56.981407624Z	32.4	65.3	2.22	1.13	2.45	2.99	1.97	1.99	0.09	2.99	27	1	116	74	80	99	0	98
16	2023-05-30T09:30:00.516080383Z	32.4	65.4	2.21	1.13	2.44	2.98	1.96	1.97	0.09	2.98	27	1	116	74	80	99	0	98
16	2023-05-30T09:30:03.34822905Z	32.4	65.5	2.2	1.12	2.42	2.97	1.95	1.96	0.09	2.97	27	1	116	74	80	99	0	98
16	2023-05-30T09:30:06.820300188Z	32.4	65.7	2.19	1.12	2.41	2.96	1.94	1.95	0.09	2.97	27	1	116	74	80	99	0	98
16	2023-05-30T09:30:10.084666702Z	32.4	65.8	2.17	1.11	2.39	2.96	1.93	1.95	0.09	2.96	27	1	116	74	80	99	0	98
16	2023-05-30T09:30:13.622254402Z	32.5	66	2.17	1.11	2.39	2.96	1.93	1.94	0.09	2.96	27	1	116	74	80	99	0	98
16	2023-05-30T09:30:16.442862997Z	32.5	66.2	2.16	1.11	2.37	2.95	1.92	1.93	0.09	2.96	27	1	116	74	80	99	0	98
16	2023-05-30T09:30:19.307762463Z	32.5	66.3	2.15	1.1	2.36	2.94	1.91	1.92	0.09	2.95	27	1	116	74	80	99	0	98
16	2023-05-30T09:30:22.374680322Z	32.5	66.5	2.16	1.1	2.35	2.95	1.91	1.93	0.09	2.96	27	1	116	74	80	99	0	98
16	2023-05-30T09:30:25.072766874Z	32.5	66.6	2.15	1.11	2.34	2.94	1.91	1.93	0.09	2.96	27	1	116	74	80	99	0	98
16	2023-05-30T09:30:27.912761294Z	32.6	66.9	2.14	1.11	2.32	2.94	1.9	1.92	0.09	2.95	27	1	116	74	80	99	0	98
16	2023-05-30T09:30:30.571359624Z	32.5	66.9	2.14	1.1	2.32	2.94	1.89	1.92	0.09	2.95	27	1	116	74	80	99	0	98
16	2023-05-30T09:30:34.046920669Z	32.6	67.1	2.14	1.1	2.32	2.93	1.89	1.91	0.09	2.95	27	1	116	74	80	99	0	98
16	2023-05-30T09:30:38.190371625Z	32.6	67.3	2.14	1.11	2.31	2.93	1.89	1.91	0.09	2.95	27	1	116	74	80	99	0	98
16	2023-05-30T09:30:41.481468191Z	32.6	67.5	2.13	1.1	2.3	2.92	1.88	1.9	0.09	2.95	27	1	116	74	80	99	0	98
16	2023-05-30T09:30:44.756349382Z	32.6	67.6	2.13	1.1	2.29	2.92	1.88	1.9	0.09	2.94	27	1	116	74	80	99	0	98
16	2023-05-30T09:30:48.434810416Z	32.6	67.8	2.12	1.1	2.28	2.91	1.87	1.89	0.09	2.94	27	1	116	74	80	99	0	98
16	2023-05-30T09:30:52.085942391Z	32.6	67.9	2.07	1.09	2.23	2.89	1.83	1.87	0.09	2.89	27	1	116	74	80	99	0	98
16	2023-05-30T09:30:55.967652188Z	32.6	66.1	2.06	1.05	1.93	2.77	1.71	1.78	0.09	2.7	27	1	116	74	80	99	0	98
16	2023-05-30T09:30:58.838431703Z	32.7	58.8	1.99	1.06	1.82	2.72	1.65	1.74	0.09	2.63	27	1	116	74	80	99	0	98
16	2023-05-30T09:31:01.921888769Z	32.6	55.2	1.91	1.04	1.68	2.62	1.6	1.68	0.09	2.56	27	1	116	74	80	99	0	98
16	2023-05-30T09:31:04.792361624Z	32.6	52.7	1.84	1.02	1.53	2.51	1.54	1.61	0.09	2.49	27	1	116	74	80	99	0	98
16	2023-05-30T09:31:08.062233567Z	32.6	51.1	1.77	0.98	1.4	2.39	1.48	1.53	0.09	2.44	27	1	116	74	80	99	0	98
16	2023-05-30T09:31:11.745443679Z	32.6	50.3	1.72	0.96	1.29	2.31	1.43	1.48	0.09	2.39	27	1	116	74	80	99	0	98
16	2023-05-30T09:31:14.816010919Z	32.6	49.6	1.68	0.95	1.19	2.22	1.39	1.45	0.09	2.36	27	1	116	74	80	99	0	98
16	2023-05-30T09:31:17.907475744Z	32.6	49	1.65	0.94	1.1	2.13	1.36	1.42	0.09	2.33	27	1	116	74	80	99	0	98
16	2023-05-30T09:31:20.555618721Z	32.6	48.6	1.62	0.92	1.05	2.07	1.34	1.4	0.09	2.32	27	1	116	74	80	99	0	98
16	2023-05-30T09:31:24.444848167Z	32.6	48	1.59	0.91	1.01	2.01	1.32	1.37	0.09	2.29	27	1	116	74	80	99	0	98
16	2023-05-30T09:31:28.114453243Z	32.5	47.4	1.56	0.9	0.95	1.94	1.29	1.34	0.09	2.27	27	1	116	74	80	99	0	98
16	2023-05-30T09:31:31.181374587Z	32.5	47.2	1.54	0.88	0.92	1.88	1.27	1.32	0.09	2.26	27	1	116	74	80	99	0	98
16	2023-05-30T09:31:34.404828571Z	32.5	47	1.53	0.88	0.89	1.84	1.26	1.31	0.09	2.25	27	1	116	74	80	99	0	98
16	2023-05-30T09:31:37.762138679Z	32.5	46.7	1.51	0.87	0.88	1.8	1.24	1.3	0.09	2.24	27	1	116	74	80	99	0	98
16	2023-05-30T09:31:40.767493854Z	32.5	46.6	1.51	0.87	0.87	1.77	1.23	1.29	0.09	2.24	27	1	116	74	80	99	0	98
16	2023-05-30T09:31:43.918405639Z	32.4	46.5	1.5	0.86	0.86	1.74	1.22	1.28	0.09	2.23	27	1	116	74	80	99	0	98
16	2023-05-30T09:31:47.051356911Z	32.4	46.3	1.49	0.86	0.85	1.71	1.21	1.27	0.09	2.23	27	1	116	74	80	99	0	98
16	2023-05-30T09:31:49.653764391Z	32.4	46.1	1.48	0.85	0.84	1.68	1.2	1.26	0.09	2.22	27	1	116	74	80	99	0	98
16	2023-05-30T09:31:53.310160527Z	32.4	46.2	1.47	0.84	0.84	1.65	1.19	1.25	0.09	2.21	27	1	116	74	80	99	0	98
16	2023-05-30T09:31:55.765426317Z	32.4	46	1.46	0.84	0.83	1.63	1.18	1.24	0.09	2.21	27	1	116	74	80	99	0	98
16	2023-05-30T09:31:59.499132375Z	32.4	46.1	1.46	0.84	0.83	1.62	1.18	1.24	0.09	2.2	27	1	116	74	80	99	0	98
16	2023-05-30T09:32:02.80712527Z	32.4	46	1.45	0.83	0.83	1.6	1.17	1.23	0.09	2.2	27	1	116	74	80	99	0	98
16	2023-05-30T09:32:05.604722419Z	32.4	45.9	1.44	0.83	0.83	1.58	1.16	1.22	0.09	2.19	27	1	116	74	80	99	0	98
16	2023-05-30T09:32:08.888373781Z	32.4	46	1.44	0.82	0.83	1.57	1.16	1.22	0.09	2.19	27	1	116	74	80	99	0	98
16	2023-05-30T09:32:11.753371629Z	32.4	46	1.44	0.82	0.83	1.55	1.15	1.22	0.09	2.2	27	1	116	74	80	99	0	98
16	2023-05-30T09:32:15.231670473Z	32.4	45.8	1.44	0.82	0.83	1.53	1.15	1.22	0.09	2.19	27	1	116	74	80	99	0	98
16	2023-05-30T09:32:26.138269741Z	32.4	45.8	1.44	0.82	0.83	1.53	1.15	1.22	0.09	2.19	27	1	116	74	80	99	0	98
16	2023-05-30T09:32:32.502573045Z	32.4	46	1.42	0.81	0.82	1.49	1.14	1.21	0.09	2.18	27	1	116	74	80	99	0	98
16	2023-05-30T09:32:39.370596612Z	32.3	45.5	1.42	0.81	0.83	1.47	1.13	1.2	0.09	2.18	27	1	116	74	80	99	0	98
16	2023-05-30T09:32:42.674406161Z	32.3	45.9	1.41	0.8	0.83	1.46	1.13	1.2	0.09	2.18	27	1	116	74	80	99	0	98
16	2023-05-30T09:32:46.589848041Z	32.3	45.9	1.41	0.8	0.83	1.45	1.12	1.2	0.09	2.18	27	1	116	74	80	99	0	98
16	2023-05-30T09:32:49.511561956Z	32.3	45.8	1.41	0.8	0.83	1.45	1.12	1.2	0.09	2.18	27	1	116	74	80	99	0	98
16	2023-05-30T09:32:53.401065309Z	32.2	45.6	1.4	0.8	0.83	1.44	1.12	1.19	0.09	2.18	27	1	116	74	80	99	0	98
16	2023-05-30T09:32:58.978104272Z	32.2	45.8	1.4	0.8	0.83	1.44	1.11	1.19	0.09	2.18	27	1	116	74	80	99	0	98
16	2023-05-30T09:33:01.925434182Z	32.2	45.8	1.38	0.79	0.83	1.42	1.1	1.19	0.09	2.18	27	1	116	74	80	99	0	98
16	2023-05-30T09:33:06.02969708Z	32.2	45.9	1.39	0.79	0.83	1.42	1.1	1.18	0.09	2.17	27	1	116	74	80	99	0	98
16	2023-05-30T09:33:08.876829462Z	32.2	46	1.39	0.79	0.83	1.41	1.1	1.18	0.09	2.17	27	1	116	74	80	99	0	98
16	2023-05-30T09:33:12.173758395Z	32.2	45.9	1.39	0.79	0.83	1.41	1.1	1.18	0.09	2.18	27	1	116	74	80	99	0	98
16	2023-05-30T09:33:14.848534497Z	32.2	45.9	1.39	0.79	0.83	1.42	1.09	1.18	0.09	2.18	27	1	116	74	80	99	0	98
16	2023-05-30T09:33:17.692064331Z	32.2	45.8	1.39	0.79	0.83	1.42	1.09	1.18	0.09	2.17	27	1	116	74	80	99	0	98
17	2023-05-30T09:33:21.02325205Z	32.2	45.8	1.39	0.79	0.83	1.41	1.09	1.18	0.09	2.18	38	1	127	81	100	99	0	94
17	2023-05-30T09:33:23.836276545Z	32.2	45.9	1.37	0.79	0.83	1.41	1.09	1.18	0.09	2.18	38	1	127	81	100	99	0	94
17	2023-05-30T09:33:27.513162689Z	32.2	46	1.39	0.79	0.83	1.4	1.09	1.18	0.09	2.17	38	1	127	81	100	99	0	94
17	2023-05-30T09:33:30.389684823Z	32.2	45.8	1.39	0.78	0.83	1.4	1.09	1.18	0.09	2.17	38	1	127	81	100	99	0	94
17	2023-05-30T09:33:33.322237562Z	32.1	45.5	1.38	0.78	0.83	1.4	1.09	1.18	0.09	2.17	38	1	127	81	100	99	0	94
17	2023-05-30T09:33:37.150556255Z	32.1	45.6	1.38	0.78	0.83	1.4	1.08	1.17	0.09	2.17	38	1	127	81	100	99	0	94
17	2023-05-30T09:33:40.078417956Z	32.2	45.5	1.38	0.78	0.83	1.39	1.08	1.17	0.09	2.17	38	1	127	81	100	99	0	94
17	2023-05-30T09:33:43.507373317Z	32.2	45.7	1.38	0.78	0.83	1.39	1.08	1.17	0.09	2.16	38	1	127	81	100	99	0	94
17	2023-05-30T09:33:49.223213535Z	32.2	45.5	1.37	0.78	0.83	1.38	1.07	1.17	0.09	2.16	38	1	127	81	100	99	0	94
17	2023-05-30T09:33:52.107071701Z	32.1	45.6	1.34	0.75	0.8	1.37	1.05	1.14	0.09	2.14	38	1	127	81	100	99	0	94
17	2023-05-30T09:33:55.166964853Z	32.2	45.8	1.34	0.75	0.8	1.37	1.05	1.14	0.09	2.15	38	1	127	81	100	99	0	94
17	2023-05-30T09:33:57.830907438Z	32.1	45.9	1.35	0.75	0.8	1.38	1.05	1.15	0.09	2.15	38	1	127	81	100	99	0	94
17	2023-05-30T09:34:00.904148555Z	32.1	46.2	1.34	0.74	0.79	1.37	1.04	1.14	0.09	2.11	38	1	127	81	100	99	0	94
17	2023-05-30T09:34:03.969330301Z	32.1	46.6	1.33	0.73	0.78	1.38	1.04	1.13	0.09	2.14	38	1	127	81	100	99	0	94
17	2023-05-30T09:34:06.841814742Z	32.1	46.9	1.33	0.72	0.78	1.38	1.03	1.13	0.09	2.13	38	1	127	81	100	99	0	94
17	2023-05-30T09:34:10.199486891Z	32.1	47.2	1.32	0.72	0.77	1.39	1.03	1.13	0.09	2.13	38	1	127	81	100	99	0	94
17	2023-05-30T09:34:13.003247252Z	32.2	47.6	1.45	0.72	0.94	1.57	1.1	1.22	0.09	2.16	38	1	127	81	100	99	0	94
17	2023-05-30T09:34:15.841563908Z	32.2	48.7	1.61	0.75	1.25	1.86	1.19	1.35	0.09	2.26	38	1	127	81	100	99	0	94
17	2023-05-30T09:34:19.129143789Z	32.2	50	1.76	0.77	1.53	2.11	1.33	1.48	0.09	2.35	38	1	127	81	100	99	0	94
17	2023-05-30T09:34:22.8264667Z	32.3	51.3	1.9	0.8	1.78	2.31	1.47	1.6	0.09	2.45	38	1	127	81	100	99	0	94
17	2023-05-30T09:34:25.472190533Z	32.2	52.7	2.05	0.82	2.02	2.5	1.65	1.75	0.09	2.56	38	1	127	81	100	99	0	94
17	2023-05-30T09:34:28.379471317Z	32.3	54.4	2.14	0.84	2.17	2.61	1.78	1.86	0.09	2.63	38	1	127	81	100	99	0	94
17	2023-05-30T09:34:31.207674689Z	32.4	55.6	2.21	0.86	2.26	2.69	1.87	1.93	0.09	2.68	38	1	127	81	100	99	0	94
17	2023-05-30T09:34:34.697487173Z	32.4	56.2	2.24	0.86	2.31	2.74	1.93	1.98	0.09	2.72	38	1	127	81	100	99	0	94
17	2023-05-30T09:34:37.354984272Z	32.4	56.6	2.26	0.86	2.33	2.77	1.96	2	0.09	2.74	38	1	127	81	100	99	0	94
17	2023-05-30T09:34:40.889580035Z	32.5	56.9	2.27	0.86	2.35	2.8	1.97	2.01	0.09	2.75	38	1	127	81	100	99	0	94
17	2023-05-30T09:34:44.308625844Z	32.5	57.2	2.27	0.86	2.35	2.82	1.98	2.02	0.09	2.76	38	1	127	81	100	99	0	94
17	2023-05-30T09:34:47.187949004Z	32.6	57.4	2.28	0.86	2.34	2.84	1.99	2.03	0.09	2.77	38	1	127	81	100	99	0	94
17	2023-05-30T09:34:49.843655034Z	32.6	57.6	2.3	0.87	2.35	2.85	2	2.05	0.09	2.79	38	1	127	81	100	99	0	94
17	2023-05-30T09:34:53.337904442Z	32.6	57.8	2.31	0.87	2.35	2.86	2.01	2.06	0.09	2.8	38	1	127	81	100	99	0	94
17	2023-05-30T09:34:56.389962361Z	32.6	58	2.3	0.87	2.34	2.86	2.02	2.05	0.09	2.8	38	1	127	81	100	99	0	94
17	2023-05-30T09:34:59.279175133Z	32.7	58.3	2.3	0.87	2.33	2.86	2.01	2.05	0.09	2.79	38	1	127	81	100	99	0	94
17	2023-05-30T09:35:01.960494085Z	32.7	58.5	2.3	0.87	2.32	2.87	2.01	2.05	0.09	2.8	38	1	127	81	100	99	0	94
17	2023-05-30T09:35:05.863504692Z	32.7	58.6	2.3	0.87	2.32	2.87	2.02	2.05	0.09	2.8	38	1	127	81	100	99	0	94
17	2023-05-30T09:35:08.589756734Z	32.7	58.8	2.3	0.87	2.31	2.87	2	2.04	0.09	2.8	38	1	127	81	100	99	0	94
17	2023-05-30T09:35:13.423458744Z	32.8	59.1	2.29	0.87	2.3	2.87	1.99	2.04	0.09	2.8	38	1	127	81	100	99	0	94
17	2023-05-30T09:35:16.537883475Z	32.8	59.2	2.29	0.87	2.29	2.87	1.99	2.03	0.09	2.79	38	1	127	81	100	99	0	94
17	2023-05-30T09:35:19.620812084Z	32.8	59.4	2.28	0.87	2.29	2.87	1.99	2.03	0.09	2.79	38	1	127	81	100	99	0	94
17	2023-05-30T09:35:22.832760083Z	32.8	59.6	2.28	0.87	2.27	2.87	1.99	2.02	0.09	2.79	38	1	127	81	100	99	0	94
17	2023-05-30T09:35:26.506460823Z	32.9	59.8	2.27	0.87	2.26	2.87	1.98	2.02	0.09	2.79	38	1	127	81	100	99	0	94
17	2023-05-30T09:35:30.04038881Z	32.9	59.9	2.27	0.87	2.26	2.87	1.98	2.01	0.09	2.79	38	1	127	81	100	99	0	94
17	2023-05-30T09:35:32.45734442Z	32.9	60.2	2.26	0.87	2.25	2.87	1.98	2.01	0.09	2.79	38	1	127	81	100	99	0	94
17	2023-05-30T09:35:35.718884014Z	33	60.4	2.26	0.87	2.24	2.86	1.98	2	0.09	2.78	38	1	127	81	100	99	0	94
17	2023-05-30T09:35:39.608377343Z	33	60.6	2.25	0.86	2.23	2.86	1.97	1.99	0.09	2.78	38	1	127	81	100	99	0	94
17	2023-05-30T09:35:42.277661289Z	33	60.7	2.24	0.86	2.22	2.86	1.97	1.98	0.09	2.77	38	1	127	81	100	99	0	94
17	2023-05-30T09:35:46.191060701Z	33.1	61	2.23	0.86	2.22	2.85	1.96	1.98	0.09	2.77	38	1	127	81	100	99	0	94
17	2023-05-30T09:35:50.267640499Z	33.1	61.1	2.23	0.86	2.21	2.85	1.95	1.97	0.09	2.76	38	1	127	81	100	99	0	94
17	2023-05-30T09:35:53.529460163Z	33.1	61.3	2.22	0.86	2.2	2.85	1.94	1.96	0.09	2.76	38	1	127	81	100	99	0	94
17	2023-05-30T09:35:56.409189818Z	33.1	61.6	2.22	0.86	2.19	2.84	1.94	1.96	0.09	2.76	38	1	127	81	100	99	0	94
17	2023-05-30T09:35:59.40744405Z	33.1	61.7	2.21	0.86	2.19	2.84	1.93	1.95	0.09	2.75	38	1	127	81	100	99	0	94
17	2023-05-30T09:36:02.34772561Z	33.1	61.9	2.21	0.86	2.18	2.84	1.92	1.95	0.09	2.75	38	1	127	81	100	99	0	94
17	2023-05-30T09:36:05.009355195Z	33.2	62	2.2	0.86	2.17	2.84	1.92	1.94	0.09	2.75	38	1	127	81	100	99	0	94
17	2023-05-30T09:36:08.50588279Z	33.2	62.2	2.19	0.85	2.16	2.83	1.91	1.93	0.09	2.74	38	1	127	81	100	99	0	94
17	2023-05-30T09:36:12.376772399Z	33.2	62.3	2.1	0.82	2.12	2.8	1.86	1.87	0.09	2.69	38	1	127	81	100	99	0	94
17	2023-05-30T09:36:20.543716048Z	33.2	62.6	2.17	0.84	2.13	2.82	1.86	1.9	0.09	2.71	38	1	127	81	100	99	0	94
17	2023-05-30T09:36:26.104097233Z	33.2	61.5	2.05	0.82	1.77	2.61	1.67	1.77	0.09	2.48	38	1	127	81	100	99	0	94
17	2023-05-30T09:36:29.191682889Z	33.2	53.2	1.96	0.81	1.53	2.49	1.55	1.67	0.09	2.38	38	1	127	81	100	99	0	94
17	2023-05-30T09:36:32.670603653Z	33.3	50.3	1.87	0.8	1.4	2.41	1.49	1.6	0.09	2.36	38	1	127	81	100	99	0	94
17	2023-05-30T09:36:35.942924337Z	33.3	49.3	1.79	0.79	1.26	2.31	1.45	1.55	0.09	2.32	38	1	127	81	100	99	0	94
17	2023-05-30T09:36:39.257818541Z	33.2	48.3	1.72	0.79	1.15	2.21	1.4	1.5	0.09	2.3	38	1	127	81	100	99	0	94
17	2023-05-30T09:36:42.219564208Z	33.2	47.4	1.68	0.78	1.07	2.14	1.37	1.46	0.09	2.27	38	1	127	81	100	99	0	94
17	2023-05-30T09:36:45.799795503Z	33.2	46.9	1.64	0.78	1.01	2.06	1.34	1.42	0.09	2.25	38	1	127	81	100	99	0	94
17	2023-05-30T09:36:48.437766524Z	33.1	46.5	1.61	0.77	0.96	2	1.31	1.39	0.09	2.24	38	1	127	81	100	99	0	94
17	2023-05-30T09:36:52.307044705Z	33.1	46.4	1.59	0.77	0.93	1.95	1.29	1.37	0.09	2.22	38	1	127	81	100	99	0	94
17	2023-05-30T09:36:55.021460393Z	33.1	46.1	1.56	0.77	0.91	1.9	1.27	1.34	0.09	2.22	38	1	127	81	100	99	0	94
17	2023-05-30T09:36:57.839532072Z	33.1	45.8	1.55	0.76	0.89	1.86	1.25	1.33	0.09	2.21	38	1	127	81	100	99	0	94
17	2023-05-30T09:37:01.158559225Z	33.1	45.6	1.53	0.76	0.87	1.83	1.23	1.31	0.09	2.2	38	1	127	81	100	99	0	94
17	2023-05-30T09:37:03.971078075Z	33	45.4	1.52	0.76	0.86	1.79	1.22	1.3	0.09	2.19	38	1	127	81	100	99	0	94
17	2023-05-30T09:37:07.268898536Z	33.1	45.4	1.51	0.76	0.85	1.76	1.21	1.29	0.09	2.19	38	1	127	81	100	99	0	94
17	2023-05-30T09:37:10.364052629Z	33.1	45.3	1.5	0.76	0.85	1.73	1.2	1.28	0.09	2.19	38	1	127	81	100	99	0	94
17	2023-05-30T09:37:13.151006193Z	33	45.3	1.49	0.76	0.84	1.7	1.19	1.27	0.09	2.18	38	1	127	81	100	99	0	94
17	2023-05-30T09:37:16.504481822Z	33	45.1	1.48	0.75	0.83	1.68	1.18	1.26	0.09	2.18	38	1	127	81	100	99	0	94
17	2023-05-30T09:37:19.708017508Z	33	45	1.47	0.75	0.82	1.66	1.17	1.25	0.09	2.17	38	1	127	81	100	99	0	94
17	2023-05-30T09:37:23.194251431Z	32.9	45	1.47	0.75	0.82	1.63	1.17	1.25	0.09	2.17	38	1	127	81	100	99	0	94
17	2023-05-30T09:37:26.635873558Z	32.9	44.8	1.46	0.75	0.82	1.62	1.16	1.24	0.09	2.17	38	1	127	81	100	99	0	94
17	2023-05-30T09:37:29.620963415Z	32.9	44.9	1.45	0.75	0.81	1.6	1.15	1.23	0.09	2.17	38	1	127	81	100	99	0	94
17	2023-05-30T09:37:32.863323494Z	32.9	44.8	1.45	0.75	0.81	1.59	1.15	1.23	0.09	2.17	38	1	127	81	100	99	0	94
17	2023-05-30T09:37:36.175865485Z	32.9	44.8	1.45	0.74	0.81	1.58	1.14	1.23	0.09	2.16	38	1	127	81	100	99	0	94
17	2023-05-30T09:37:39.427054343Z	32.9	44.9	1.44	0.74	0.81	1.56	1.13	1.22	0.09	2.15	38	1	127	81	100	99	0	94
17	2023-05-30T09:37:43.123774364Z	32.9	45	1.44	0.74	0.81	1.55	1.13	1.22	0.09	2.16	38	1	127	81	100	99	0	94
17	2023-05-30T09:37:45.971781536Z	32.8	44.8	1.43	0.74	0.81	1.54	1.12	1.22	0.09	2.15	38	1	127	81	100	99	0	94
17	2023-05-30T09:37:48.947308222Z	32.8	44.7	1.43	0.74	0.81	1.53	1.12	1.22	0.09	2.15	38	1	127	81	100	99	0	94
17	2023-05-30T09:37:51.710929598Z	32.8	44.7	1.43	0.74	0.8	1.53	1.12	1.21	0.09	2.16	38	1	127	81	100	99	0	94
17	2023-05-30T09:37:55.214841981Z	32.8	44.7	1.42	0.74	0.8	1.52	1.12	1.21	0.09	2.15	38	1	127	81	100	99	0	94
17	2023-05-30T09:37:58.094976452Z	32.8	44.8	1.41	0.74	0.8	1.51	1.11	1.21	0.09	2.15	38	1	127	81	100	99	0	94
17	2023-05-30T09:38:01.374615356Z	32.8	44.8	1.42	0.74	0.81	1.51	1.11	1.21	0.09	2.14	38	1	127	81	100	99	0	94
17	2023-05-30T09:38:05.459475097Z	32.7	44.7	1.42	0.73	0.79	1.5	1.11	1.2	0.09	2.15	38	1	127	81	100	99	0	94
17	2023-05-30T09:38:08.496359341Z	32.8	44.7	1.41	0.73	0.8	1.49	1.1	1.2	0.09	2.15	38	1	127	81	100	99	0	94
17	2023-05-30T09:38:11.730049846Z	32.8	44.6	1.42	0.74	0.8	1.49	1.1	1.21	0.09	2.15	38	1	127	81	100	99	0	94
17	2023-05-30T09:38:14.474212458Z	32.8	44.6	1.42	0.74	0.8	1.49	1.1	1.2	0.09	2.15	38	1	127	81	100	99	0	94
17	2023-05-30T09:38:17.324318459Z	32.8	44.6	1.41	0.73	0.8	1.48	1.09	1.2	0.09	2.15	38	1	127	81	100	99	0	94
17	2023-05-30T09:38:19.973326831Z	32.7	44.6	1.41	0.73	0.8	1.48	1.09	1.2	0.09	2.15	38	1	127	81	100	99	0	94
17	2023-05-30T09:38:23.697807379Z	32.7	44.6	1.41	0.73	0.8	1.48	1.09	1.2	0.09	2.16	38	1	127	81	100	99	0	94
17	2023-05-30T09:38:26.74972729Z	32.8	44.8	1.4	0.73	0.8	1.48	1.09	1.2	0.09	2.15	38	1	127	81	100	99	0	94
17	2023-05-30T09:38:29.402669681Z	32.7	44.8	1.41	0.73	0.8	1.48	1.09	1.2	0.09	2.15	38	1	127	81	100	99	0	94
17	2023-05-30T09:38:31.868004083Z	32.7	44.8	1.41	0.73	0.8	1.47	1.09	1.2	0.09	2.15	38	1	127	81	100	99	0	94
17	2023-05-30T09:38:34.525502404Z	32.7	44.7	1.41	0.73	0.8	1.47	1.09	1.2	0.09	2.15	38	1	127	81	100	99	0	94
17	2023-05-30T09:38:38.242855736Z	32.8	45	1.4	0.73	0.8	1.47	1.09	1.19	0.09	2.14	38	1	127	81	100	99	0	94
17	2023-05-30T09:38:41.49784405Z	32.7	44.8	1.41	0.73	0.8	1.46	1.09	1.2	0.09	2.14	38	1	127	81	100	99	0	94
17	2023-05-30T09:38:45.56987672Z	32.7	45	1.4	0.73	0.8	1.46	1.08	1.19	0.09	2.14	38	1	127	81	100	99	0	94
17	2023-05-30T09:38:49.048624859Z	32.7	45	1.4	0.73	0.8	1.45	1.08	1.19	0.09	2.14	38	1	127	81	100	99	0	94
17	2023-05-30T09:38:52.388755441Z	32.7	44.8	1.4	0.73	0.8	1.45	1.08	1.19	0.09	2.14	38	1	127	81	100	99	0	94
17	2023-05-30T09:38:56.026953161Z	32.7	44.8	1.4	0.73	0.8	1.45	1.08	1.19	0.09	2.14	38	1	127	81	100	99	0	94
17	2023-05-30T09:38:59.315034967Z	32.7	44.9	1.4	0.73	0.8	1.45	1.08	1.19	0.09	2.14	38	1	127	81	100	99	0	94
17	2023-05-30T09:39:03.006032941Z	32.7	44.8	1.4	0.73	0.8	1.45	1.08	1.19	0.09	2.14	38	1	127	81	100	99	0	94
17	2023-05-30T09:39:05.925781945Z	32.7	44.9	1.39	0.73	0.8	1.44	1.08	1.19	0.09	2.14	38	1	127	81	100	99	0	94
17	2023-05-30T09:39:09.561185073Z	32.7	44.8	1.39	0.73	0.8	1.44	1.07	1.19	0.09	2.14	38	1	127	81	100	99	0	94
17	2023-05-30T09:39:13.441781998Z	32.7	44.8	1.39	0.73	0.8	1.43	1.07	1.19	0.09	2.14	38	1	127	81	100	99	0	94
17	2023-05-30T09:39:16.298971594Z	32.6	44.7	1.39	0.73	0.8	1.43	1.07	1.19	0.09	2.14	38	1	127	81	100	99	0	94
17	2023-05-30T09:39:19.591838321Z	32.6	44.8	1.39	0.72	0.8	1.43	1.07	1.18	0.09	2.14	38	1	127	81	100	99	0	94
17	2023-05-30T09:39:22.438080997Z	32.6	44.8	1.39	0.72	0.8	1.43	1.07	1.19	0.09	2.14	38	1	127	81	100	99	0	94
17	2023-05-30T09:39:24.912491274Z	32.6	44.9	1.39	0.72	0.8	1.43	1.07	1.19	0.09	2.15	38	1	127	81	100	99	0	94
17	2023-05-30T09:39:27.807426827Z	32.6	45	1.39	0.72	0.8	1.43	1.07	1.19	0.09	2.16	38	1	127	81	100	99	0	94
17	2023-05-30T09:39:31.058038742Z	32.6	45.1	1.4	0.72	0.8	1.43	1.07	1.19	0.09	2.15	38	1	127	81	100	99	0	94
17	2023-05-30T09:39:34.406523485Z	32.6	45.2	1.4	0.72	0.8	1.43	1.08	1.19	0.09	2.15	38	1	127	81	100	99	0	94
17	2023-05-30T09:39:37.422585728Z	32.6	45.2	1.4	0.72	0.8	1.43	1.07	1.19	0.09	2.15	38	1	127	81	100	99	0	94
17	2023-05-30T09:39:40.680114345Z	32.6	45.2	1.4	0.72	0.8	1.43	1.08	1.19	0.09	2.15	38	1	127	81	100	99	0	94
17	2023-05-30T09:39:44.164325295Z	32.6	45	1.4	0.72	0.8	1.43	1.07	1.19	0.09	2.14	38	1	127	81	100	99	0	94
17	2023-05-30T09:39:47.626625281Z	32.6	44.9	1.4	0.72	0.8	1.43	1.07	1.19	0.09	2.15	38	1	127	81	100	99	0	94
17	2023-05-30T09:39:50.903470521Z	32.6	44.8	1.4	0.72	0.8	1.43	1.07	1.19	0.09	2.14	38	1	127	81	100	99	0	94
17	2023-05-30T09:39:53.565617705Z	32.6	45	1.39	0.72	0.8	1.43	1.07	1.19	0.09	2.15	38	1	127	81	100	99	0	94
17	2023-05-30T09:39:57.040554229Z	32.6	44.9	1.39	0.72	0.8	1.43	1.07	1.19	0.09	2.15	38	1	127	81	100	99	0	94
17	2023-05-30T09:39:59.502639583Z	32.6	44.8	1.39	0.72	0.8	1.43	1.07	1.18	0.09	2.15	38	1	127	81	100	99	0	94
17	2023-05-30T09:40:02.414518784Z	32.6	44.9	1.39	0.72	0.8	1.42	1.07	1.18	0.09	2.15	38	1	127	81	100	99	0	94
18	2023-05-30T09:40:05.071582705Z	32.6	44.9	1.39	0.72	0.79	1.42	1.07	1.18	0.09	2.14	65	0	109	64	65	99	1	181	pain
18	2023-05-30T09:40:08.305594276Z	32.6	44.8	1.38	0.72	0.79	1.42	1.06	1.18	0.09	2.13	65	0	109	64	65	99	1	181	pain
18	2023-05-30T09:40:11.452521137Z	32.6	44.8	1.39	0.72	0.79	1.41	1.06	1.18	0.09	2.15	65	0	109	64	65	99	1	181	pain
18	2023-05-30T09:40:14.887859459Z	32.6	44.7	1.39	0.72	0.79	1.41	1.06	1.18	0.09	2.14	65	0	109	64	65	99	1	181	pain
18	2023-05-30T09:40:17.742805837Z	32.6	44.7	1.38	0.72	0.79	1.41	1.06	1.18	0.09	2.14	65	0	109	64	65	99	1	181	pain
18	2023-05-30T09:40:20.6549824Z	32.6	44.8	1.38	0.72	0.79	1.41	1.06	1.18	0.09	2.14	65	0	109	64	65	99	1	181	pain
18	2023-05-30T09:40:24.310467095Z	32.6	44.8	1.38	0.72	0.79	1.41	1.06	1.18	0.09	2.14	65	0	109	64	65	99	1	181	pain
18	2023-05-30T09:40:27.359659738Z	32.5	44.8	1.38	0.72	0.79	1.41	1.06	1.18	0.09	2.14	65	0	109	64	65	99	1	181	pain
18	2023-05-30T09:40:30.636506804Z	32.5	44.9	1.38	0.72	0.79	1.41	1.06	1.18	0.09	2.14	65	0	109	64	65	99	1	181	pain
18	2023-05-30T09:40:33.496209433Z	32.5	45	1.38	0.72	0.79	1.41	1.06	1.18	0.09	2.14	65	0	109	64	65	99	1	181	pain
18	2023-05-30T09:40:36.989702713Z	32.5	45	1.38	0.72	0.8	1.41	1.06	1.18	0.09	2.14	65	0	109	64	65	99	1	181	pain
18	2023-05-30T09:40:40.481193388Z	32.5	45.1	1.38	0.72	0.8	1.41	1.05	1.18	0.09	2.14	65	0	109	64	65	99	1	181	pain
18	2023-05-30T09:40:43.327446249Z	32.5	45.1	1.38	0.72	0.79	1.41	1.06	1.18	0.09	2.14	65	0	109	64	65	99	1	181	pain
18	2023-05-30T09:40:45.994980386Z	32.5	45.1	1.38	0.72	0.8	1.41	1.06	1.18	0.09	2.14	65	0	109	64	65	99	1	181	pain
18	2023-05-30T09:40:49.339123549Z	32.5	45.1	1.38	0.72	0.8	1.41	1.06	1.18	0.09	2.14	65	0	109	64	65	99	1	181	pain
18	2023-05-30T09:40:52.144996318Z	32.5	45	1.38	0.72	0.8	1.41	1.06	1.18	0.09	2.15	65	0	109	64	65	99	1	181	pain
18	2023-05-30T09:40:54.610726015Z	32.5	45.2	1.38	0.72	0.8	1.41	1.06	1.18	0.09	2.15	65	0	109	64	65	99	1	181	pain
18	2023-05-30T09:40:58.074385818Z	32.5	45.4	1.38	0.72	0.8	1.41	1.06	1.18	0.09	2.16	65	0	109	64	65	99	1	181	pain
18	2023-05-30T09:41:01.350432945Z	32.5	45.8	1.38	0.72	0.81	1.42	1.06	1.18	0.09	2.16	65	0	109	64	65	99	1	181	pain
18	2023-05-30T09:41:04.427411903Z	32.6	46.2	1.38	0.72	0.81	1.42	1.06	1.18	0.09	2.16	65	0	109	64	65	99	1	181	pain
18	2023-05-30T09:41:07.298981017Z	32.5	46.5	1.39	0.72	0.82	1.43	1.06	1.18	0.09	2.17	65	0	109	64	65	99	1	181	pain
18	2023-05-30T09:41:11.17106064Z	32.6	46.9	1.39	0.72	0.82	1.43	1.06	1.18	0.09	2.18	65	0	109	64	65	99	1	181	pain
18	2023-05-30T09:41:14.460807618Z	32.6	47.3	1.39	0.72	0.83	1.44	1.07	1.18	0.09	2.18	65	0	109	64	65	99	1	181	pain
18	2023-05-30T09:41:17.942760244Z	32.7	47.9	1.39	0.72	0.83	1.45	1.07	1.19	0.09	2.19	65	0	109	64	65	99	1	181	pain
18	2023-05-30T09:41:21.419788115Z	32.7	48.1	1.4	0.71	0.84	1.46	1.07	1.19	0.09	2.19	65	0	109	64	65	99	1	181	pain
18	2023-05-30T09:41:24.298909746Z	32.7	48.5	1.4	0.71	0.84	1.46	1.07	1.19	0.09	2.19	65	0	109	64	65	99	1	181	pain
18	2023-05-30T09:41:27.563585413Z	32.7	48.8	1.4	0.71	0.85	1.47	1.07	1.19	0.09	2.2	65	0	109	64	65	99	1	181	pain
18	2023-05-30T09:41:31.048810269Z	32.8	49.2	1.41	0.71	0.85	1.48	1.08	1.19	0.09	2.21	65	0	109	64	65	99	1	181	pain
18	2023-05-30T09:41:34.336952846Z	32.8	49.6	1.58	0.72	0.89	1.57	1.24	1.34	0.09	2.32	65	0	109	64	65	99	1	181	pain
18	2023-05-30T09:41:37.101896265Z	32.9	50.4	1.79	0.74	1	1.74	1.4	1.54	0.09	2.43	65	0	109	64	65	99	1	181	pain
18	2023-05-30T09:41:40.474915332Z	32.9	51.2	1.94	0.77	1.22	1.94	1.51	1.66	0.09	2.49	65	0	109	64	65	99	1	181	pain
18	2023-05-30T09:41:43.972629495Z	32.9	51.7	2	0.79	1.47	2.13	1.59	1.72	0.09	2.53	65	0	109	64	65	99	1	181	pain
18	2023-05-30T09:41:47.840879192Z	32.9	52.1	2.03	0.8	1.59	2.24	1.65	1.75	0.09	2.56	65	0	109	64	65	99	1	181	pain
18	2023-05-30T09:41:50.303502372Z	33	52.6	2.05	0.81	1.65	2.3	1.68	1.77	0.09	2.58	65	0	109	64	65	99	1	181	pain
18	2023-05-30T09:41:53.210917532Z	33	53	2.05	0.81	1.67	2.32	1.7	1.78	0.09	2.59	65	0	109	64	65	99	1	181	pain
18	2023-05-30T09:41:56.23069658Z	33.1	53.3	2.05	0.81	1.68	2.34	1.71	1.79	0.09	2.6	65	0	109	64	65	99	1	181	pain
18	2023-05-30T09:41:59.969973003Z	33.1	53.6	2.06	0.81	1.68	2.36	1.72	1.79	0.09	2.6	65	0	109	64	65	99	1	181	pain
18	2023-05-30T09:42:03.217361976Z	33.1	53.8	2.06	0.81	1.68	2.37	1.73	1.8	0.09	2.61	65	0	109	64	65	99	1	181	pain
18	2023-05-30T09:42:05.871260802Z	33.1	54.1	2.06	0.81	1.68	2.38	1.73	1.8	0.09	2.61	65	0	109	64	65	99	1	181	pain
18	2023-05-30T09:42:09.573282178Z	33.1	54.4	2.06	0.81	1.68	2.38	1.73	1.8	0.09	2.61	65	0	109	64	65	99	1	181	pain
18	2023-05-30T09:42:15.274688791Z	33.1	54.6	2.05	0.81	1.67	2.39	1.73	1.8	0.09	2.61	65	0	109	64	65	99	1	181	pain
18	2023-05-30T09:42:18.37697787Z	33.1	55	2.05	0.81	1.66	2.39	1.73	1.79	0.09	2.61	65	0	109	64	65	99	1	181	pain
18	2023-05-30T09:42:21.237129906Z	33.2	55.5	2.04	0.81	1.66	2.39	1.73	1.79	0.09	2.61	65	0	109	64	65	99	1	181	pain
18	2023-05-30T09:42:25.193179654Z	33.2	55.8	2.04	0.81	1.65	2.39	1.72	1.79	0.09	2.61	65	0	109	64	65	99	1	181	pain
18	2023-05-30T09:42:28.597548045Z	33.2	56	2.04	0.81	1.64	2.39	1.72	1.78	0.09	2.61	65	0	109	64	65	99	1	181	pain
18	2023-05-30T09:42:31.464398797Z	33.2	56.3	2.03	0.81	1.64	2.39	1.72	1.78	0.09	2.61	65	0	109	64	65	99	1	181	pain
18	2023-05-30T09:42:34.541619623Z	33.2	56.6	2.03	0.81	1.63	2.39	1.71	1.77	0.09	2.61	65	0	109	64	65	99	1	181	pain
18	2023-05-30T09:42:38.097429719Z	33.2	56.8	2.02	0.8	1.63	2.39	1.71	1.77	0.09	2.61	65	0	109	64	65	99	1	181	pain
18	2023-05-30T09:42:40.735703315Z	33.3	57.2	2.02	0.8	1.62	2.39	1.7	1.76	0.09	2.6	65	0	109	64	65	99	1	181	pain
18	2023-05-30T09:42:43.743221814Z	33.3	57.4	2.01	0.8	1.62	2.39	1.7	1.76	0.09	2.6	65	0	109	64	65	99	1	181	pain
18	2023-05-30T09:42:46.63230958Z	33.3	57.6	2.01	0.8	1.61	2.39	1.69	1.76	0.09	2.6	65	0	109	64	65	99	1	181	pain
18	2023-05-30T09:42:50.108272357Z	33.4	57.9	2	0.8	1.61	2.39	1.68	1.75	0.09	2.6	65	0	109	64	65	99	1	181	pain
18	2023-05-30T09:42:53.788568971Z	33.3	58	2	0.8	1.61	2.39	1.68	1.74	0.09	2.6	65	0	109	64	65	99	1	181	pain
18	2023-05-30T09:42:56.438744669Z	33.4	58.3	1.99	0.8	1.6	2.39	1.67	1.74	0.09	2.59	65	0	109	64	65	99	1	181	pain
18	2023-05-30T09:42:59.315004254Z	33.4	58.5	1.99	0.79	1.6	2.38	1.67	1.74	0.09	2.59	65	0	109	64	65	99	1	181	pain
18	2023-05-30T09:43:01.999708825Z	33.3	58.7	1.99	0.79	1.59	2.38	1.66	1.73	0.09	2.59	65	0	109	64	65	99	1	181	pain
18	2023-05-30T09:43:06.708930832Z	33.4	58.9	1.98	0.79	1.58	2.38	1.65	1.72	0.09	2.58	65	0	109	64	65	99	1	181	pain
18	2023-05-30T09:43:09.359794229Z	33.4	59.1	1.97	0.79	1.58	2.38	1.65	1.72	0.09	2.58	65	0	109	64	65	99	1	181	pain
18	2023-05-30T09:43:12.849253124Z	33.4	59.3	1.97	0.79	1.58	2.38	1.64	1.72	0.09	2.58	65	0	109	64	65	99	1	181	pain
18	2023-05-30T09:43:16.13108935Z	33.4	59.5	1.97	0.79	1.57	2.38	1.63	1.71	0.09	2.58	65	0	109	64	65	99	1	181	pain
18	2023-05-30T09:43:19.427802182Z	33.4	59.7	1.96	0.79	1.57	2.38	1.63	1.71	0.09	2.58	65	0	109	64	65	99	1	181	pain
18	2023-05-30T09:43:22.097466637Z	33.5	60	1.95	0.78	1.57	2.37	1.62	1.7	0.09	2.58	65	0	109	64	65	99	1	181	pain
18	2023-05-30T09:43:25.522486608Z	33.5	60.1	1.95	0.78	1.56	2.37	1.62	1.7	0.09	2.58	65	0	109	64	65	99	1	181	pain
18	2023-05-30T09:43:28.419009565Z	33.5	60.4	1.95	0.78	1.56	2.37	1.61	1.69	0.09	2.57	65	0	109	64	65	99	1	181	pain
18	2023-05-30T09:43:31.682291541Z	33.5	60.6	1.94	0.78	1.56	2.37	1.61	1.69	0.09	2.57	65	0	109	64	65	99	1	181	pain
18	2023-05-30T09:43:35.598765094Z	33.5	60.7	1.94	0.78	1.55	2.36	1.6	1.68	0.09	2.57	65	0	109	64	65	99	1	181	pain
18	2023-05-30T09:43:40.092333196Z	33.5	60.9	1.93	0.78	1.54	2.36	1.6	1.68	0.09	2.57	65	0	109	64	65	99	1	181	pain
18	2023-05-30T09:43:42.939160239Z	33.6	61.2	1.89	0.78	1.53	2.36	1.59	1.67	0.09	2.56	65	0	109	64	65	99	1	181	pain
18	2023-05-30T09:43:46.428394513Z	33.5	61.4	1.92	0.77	1.54	2.35	1.59	1.67	0.09	2.56	65	0	109	64	65	99	1	181	pain
18	2023-05-30T09:43:48.880237142Z	33.6	61.7	1.91	0.77	1.53	2.35	1.58	1.66	0.09	2.56	65	0	109	64	65	99	1	181	pain
18	2023-05-30T09:43:51.547790014Z	33.6	61.9	1.91	0.77	1.53	2.35	1.58	1.66	0.09	2.56	65	0	109	64	65	99	1	181	pain
18	2023-05-30T09:43:54.424786239Z	33.6	62	1.9	0.77	1.53	2.35	1.57	1.66	0.09	2.55	65	0	109	64	65	99	1	181	pain
18	2023-05-30T09:43:56.869264187Z	33.6	62	1.88	0.77	1.47	2.32	1.54	1.65	0.09	2.47	65	0	109	64	65	99	1	181	pain
18	2023-05-30T09:44:01.371767421Z	33.6	58.2	1.82	0.76	1.38	2.26	1.49	1.62	0.09	2.42	65	0	109	64	65	99	1	181	pain
18	2023-05-30T09:44:04.85310218Z	33.6	55.6	1.74	0.76	1.23	2.12	1.42	1.55	0.09	2.37	65	0	109	64	65	99	1	181	pain
18	2023-05-30T09:44:07.94934421Z	33.6	51.9	1.7	0.75	1.14	2.03	1.37	1.49	0.09	2.33	65	0	109	64	65	99	1	181	pain
18	2023-05-30T09:44:11.012752152Z	33.6	50	1.67	0.75	1.07	1.96	1.33	1.45	0.09	2.28	65	0	109	64	65	99	1	181	pain
18	2023-05-30T09:44:14.314009867Z	33.6	48.5	1.63	0.75	1.04	1.89	1.29	1.41	0.09	2.26	65	0	109	64	65	99	1	181	pain
18	2023-05-30T09:44:18.194130555Z	33.6	47.5	1.59	0.74	0.98	1.83	1.27	1.37	0.09	2.23	65	0	109	64	65	99	1	181	pain
18	2023-05-30T09:44:22.643352182Z	33.5	46.7	1.56	0.74	0.94	1.76	1.24	1.34	0.09	2.22	65	0	109	64	65	99	1	181	pain
18	2023-05-30T09:44:25.330093171Z	33.5	46	1.52	0.74	0.91	1.7	1.21	1.31	0.09	2.21	65	0	109	64	65	99	1	181	pain
18	2023-05-30T09:44:28.608659477Z	33.5	45.4	1.52	0.74	0.9	1.67	1.2	1.3	0.09	2.2	65	0	109	64	65	99	1	181	pain
18	2023-05-30T09:44:31.88836015Z	33.4	45.1	1.5	0.74	0.89	1.64	1.18	1.28	0.09	2.2	65	0	109	64	65	99	1	181	pain
18	2023-05-30T09:44:35.387105779Z	33.4	45.1	1.49	0.74	0.87	1.62	1.17	1.27	0.09	2.19	65	0	109	64	65	99	1	181	pain
18	2023-05-30T09:44:37.819551982Z	33.4	45	1.48	0.73	0.86	1.6	1.16	1.26	0.09	2.18	65	0	109	64	65	99	1	181	pain
18	2023-05-30T09:44:41.100705774Z	33.4	44.8	1.48	0.73	0.86	1.58	1.15	1.25	0.09	2.18	65	0	109	64	65	99	1	181	pain
18	2023-05-30T09:44:45.244874562Z	33.4	44.8	1.47	0.73	0.86	1.56	1.15	1.25	0.09	2.18	65	0	109	64	65	99	1	181	pain
18	2023-05-30T09:44:47.873440279Z	33.4	44.8	1.46	0.73	0.85	1.55	1.14	1.24	0.09	2.18	65	0	109	64	65	99	1	181	pain
18	2023-05-30T09:44:51.757105828Z	33.4	44.8	1.46	0.73	0.85	1.54	1.13	1.23	0.09	2.17	65	0	109	64	65	99	1	181	pain
18	2023-05-30T09:44:55.242810704Z	33.4	44.8	1.45	0.73	0.85	1.52	1.13	1.23	0.09	2.17	65	0	109	64	65	99	1	181	pain
18	2023-05-30T09:44:57.711866699Z	33.4	44.9	1.45	0.73	0.84	1.51	1.12	1.22	0.09	2.16	65	0	109	64	65	99	1	181	pain
18	2023-05-30T09:45:02.191017591Z	33.3	44.7	1.44	0.73	0.84	1.5	1.11	1.22	0.09	2.15	65	0	109	64	65	99	1	181	pain
18	2023-05-30T09:45:04.859000356Z	33.3	44.5	1.44	0.73	0.84	1.49	1.11	1.22	0.09	2.16	65	0	109	64	65	99	1	181	pain
18	2023-05-30T09:45:08.957311819Z	33.3	44.4	1.43	0.73	0.84	1.48	1.11	1.21	0.09	2.16	65	0	109	64	65	99	1	181	pain
18	2023-05-30T09:45:11.831498372Z	33.3	44	1.43	0.73	0.84	1.47	1.1	1.21	0.09	2.16	65	0	109	64	65	99	1	181	pain
18	2023-05-30T09:45:16.32423204Z	33.3	44.1	1.43	0.73	0.83	1.46	1.1	1.21	0.09	2.16	65	0	109	64	65	99	1	181	pain
18	2023-05-30T09:45:20.267001707Z	33.2	44.1	1.42	0.72	0.83	1.46	1.1	1.2	0.09	2.16	65	0	109	64	65	99	1	181	pain
18	2023-05-30T09:45:22.891177101Z	33.2	44.1	1.42	0.72	0.83	1.45	1.09	1.2	0.09	2.16	65	0	109	64	65	99	1	181	pain
[truncated: 9,044 more rows]
